# Supplementary material for: c-Myc plays a key role in IFN-γ-induced persistence of Chlamydia trachomatis
Source: eLife journal article supplement (doi:10.7554/elife.76721), 2022-09-13

**Figure 1 B**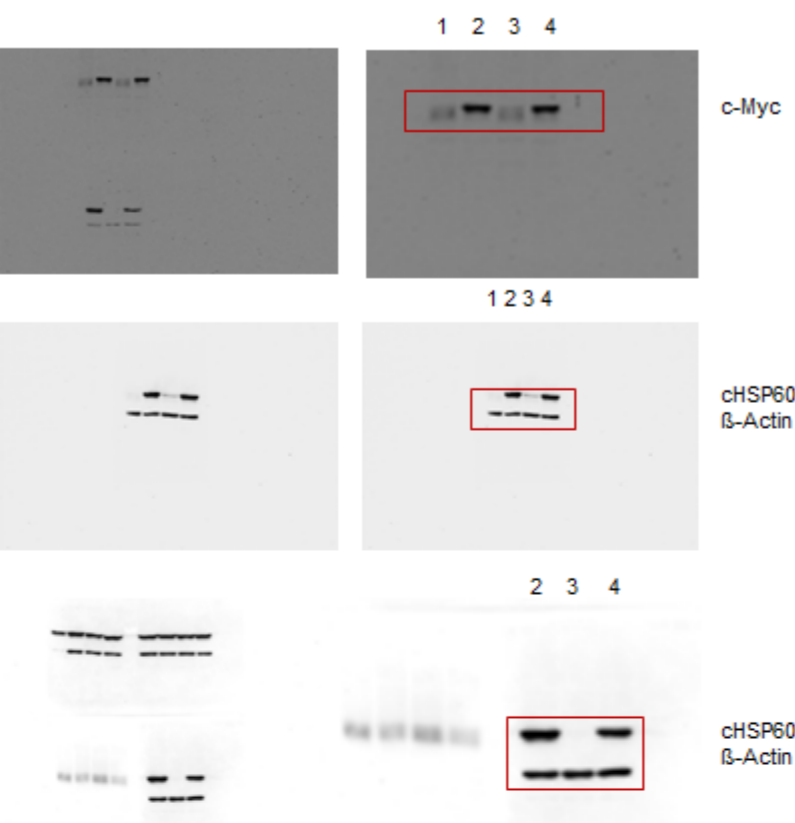**Figure 1 E**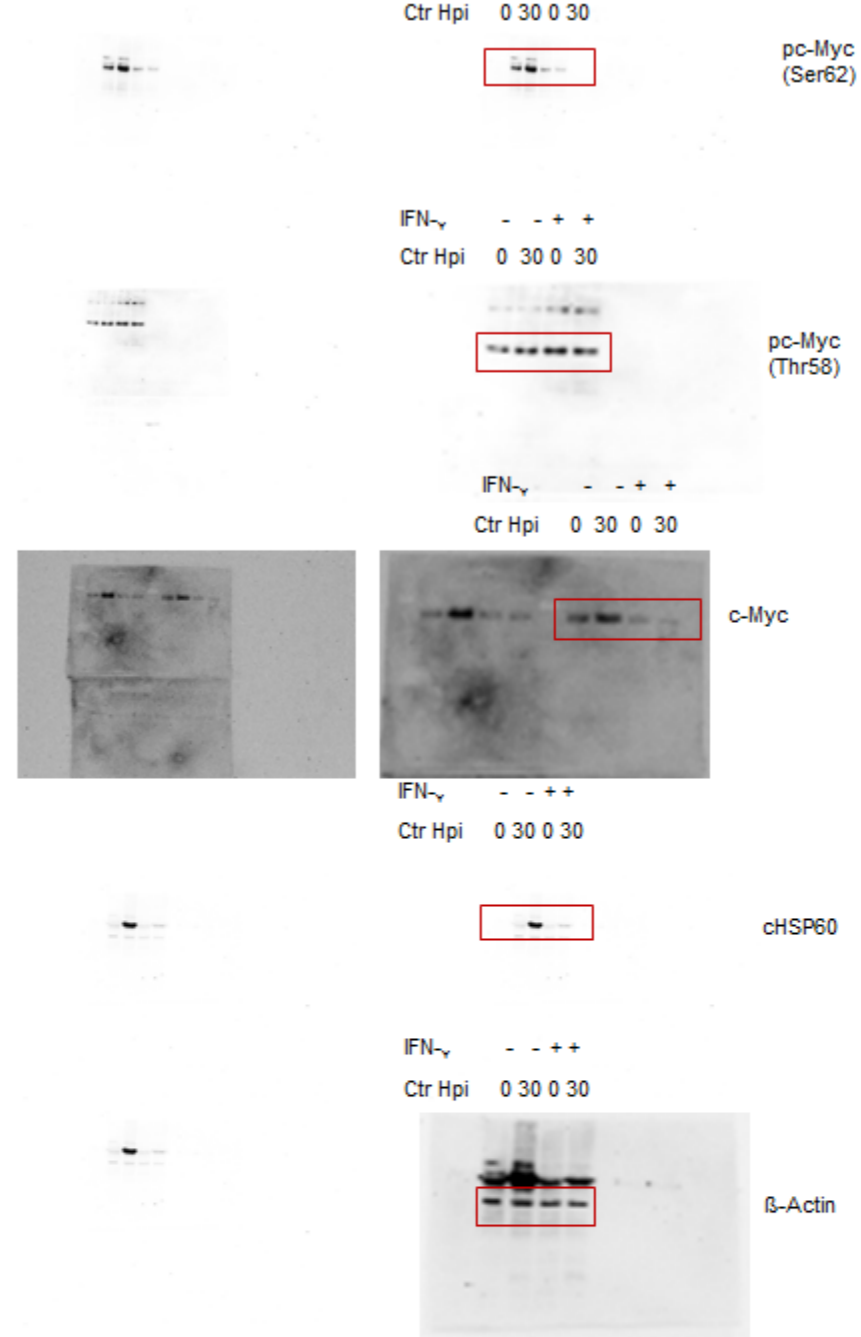**Figure 1 H**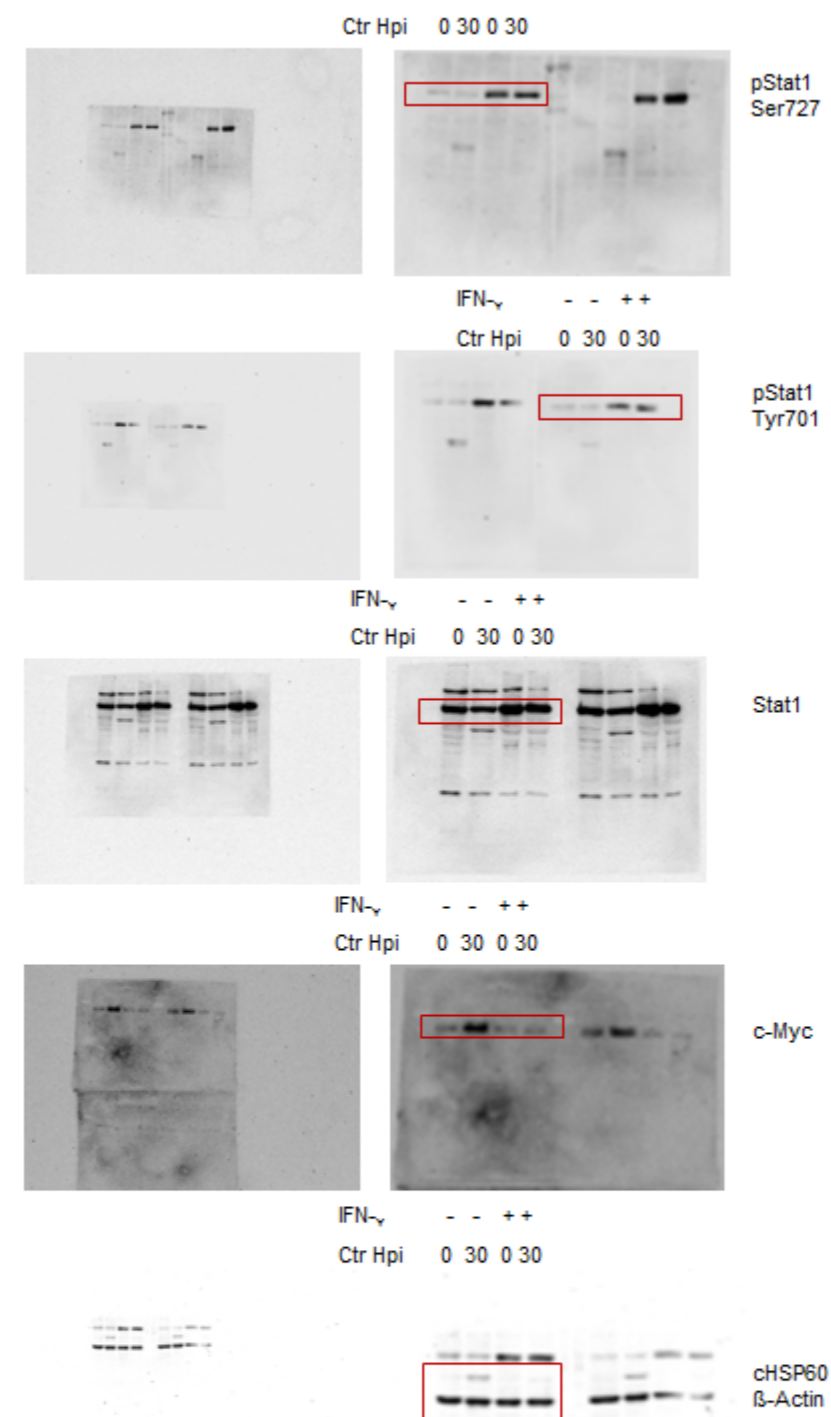**Figure 1 I**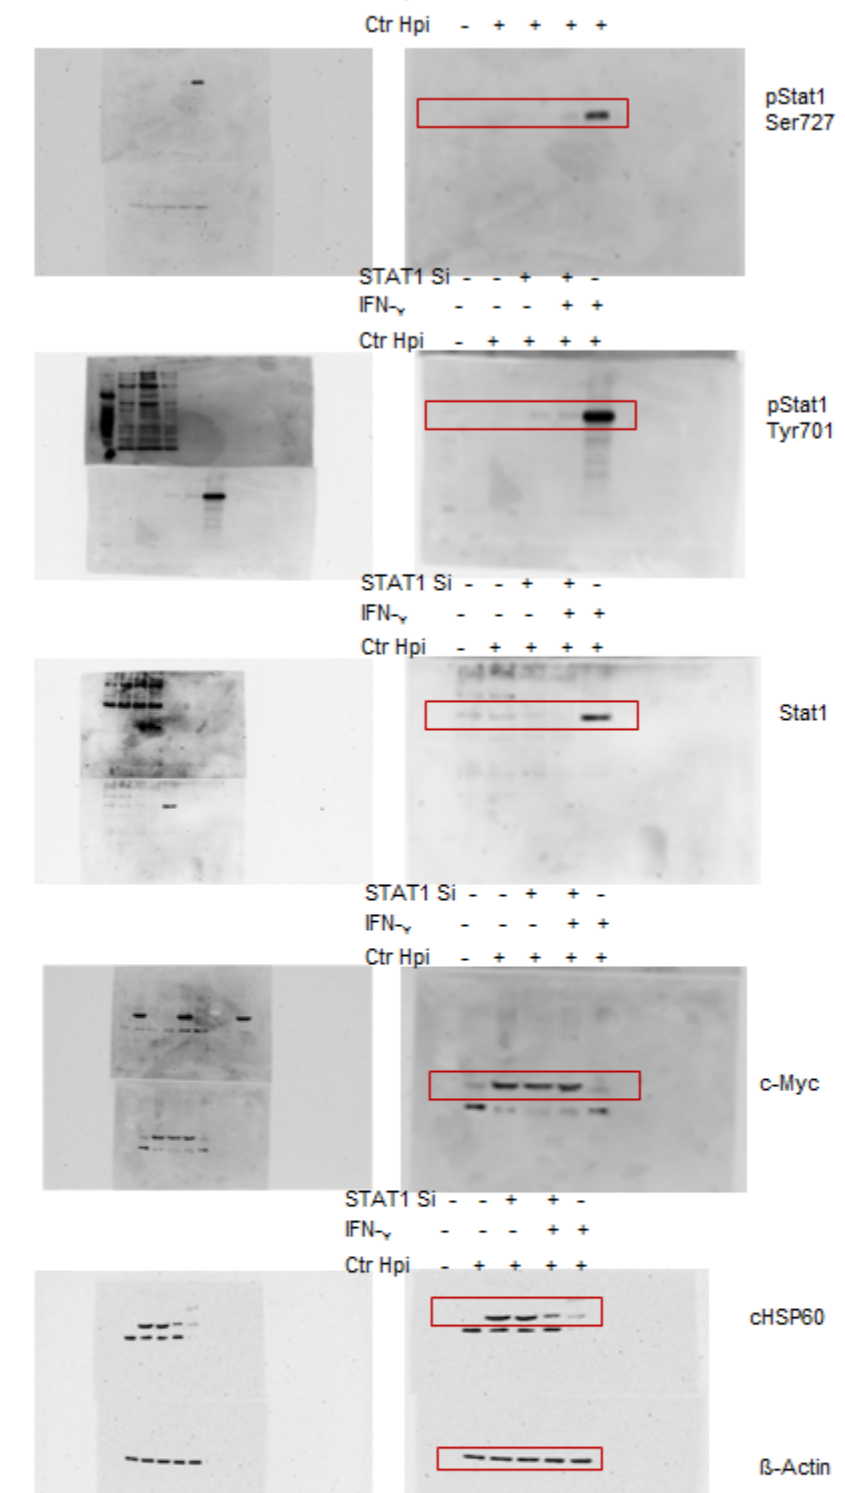**Figure 1 D**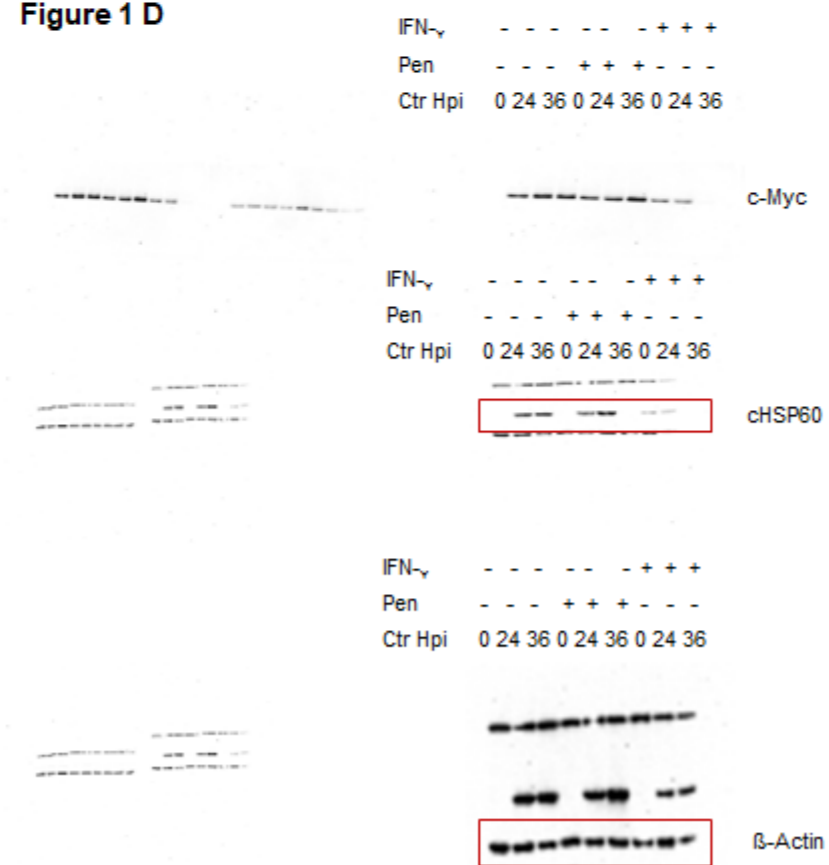**Figure 1 J**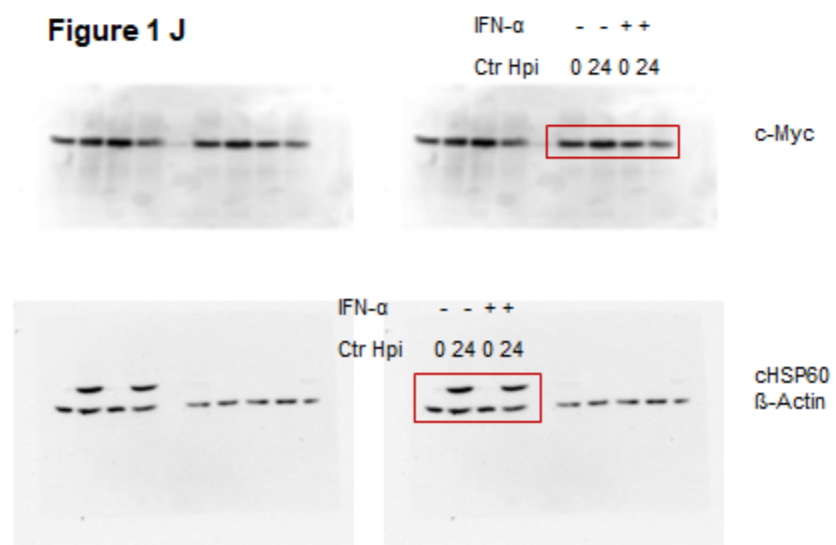

Supplement: fig1-data1 [file elife-76721-fig1-data1-v1.pdf]
