# Supplementary material for: c-Myc plays a key role in IFN-γ-induced persistence of Chlamydia trachomatis
Source: eLife journal article supplement (doi:10.7554/elife.76721), 2022-09-13

Figure 1 – figure supplement 1 C

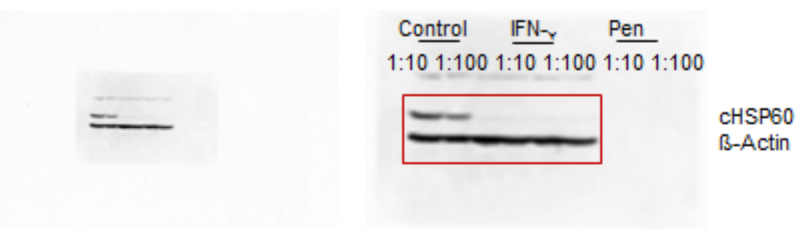

Figure 1 – figure supplement 1 E

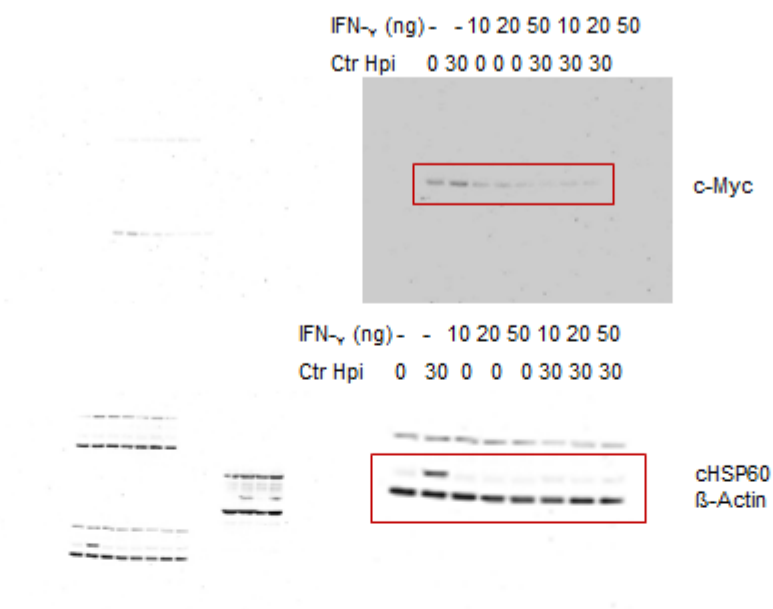

Figure 1 – figure supplement 1 F

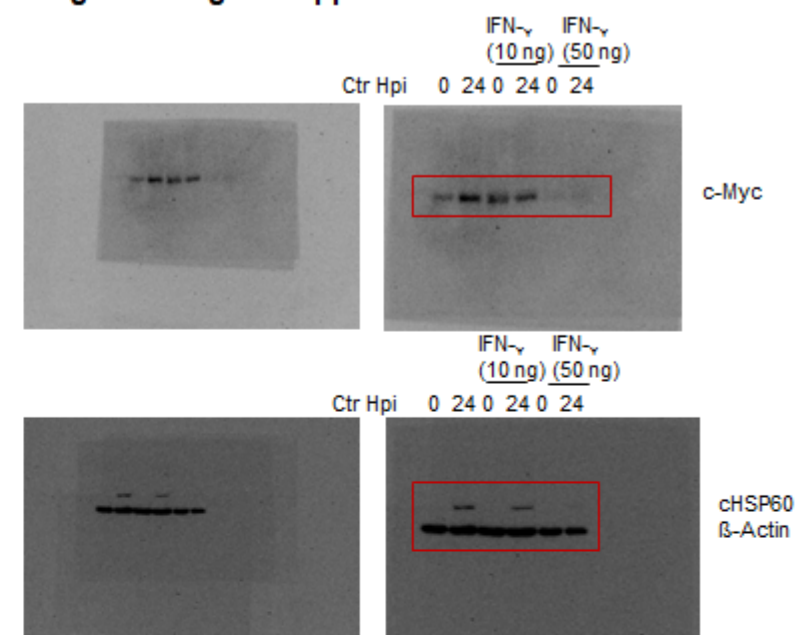

Figure 1 – figure supplement 1 G

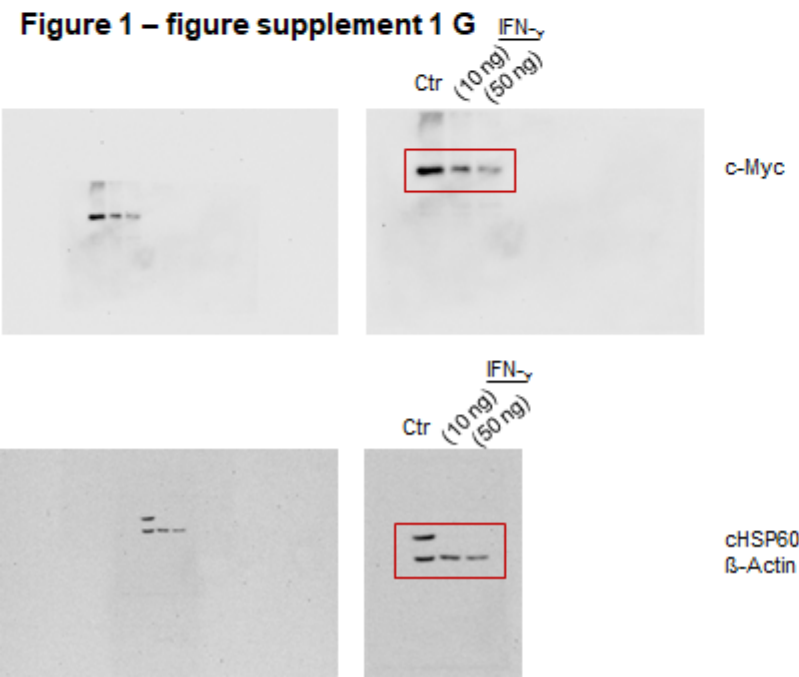

Figure 1 – figure supplement 1 I

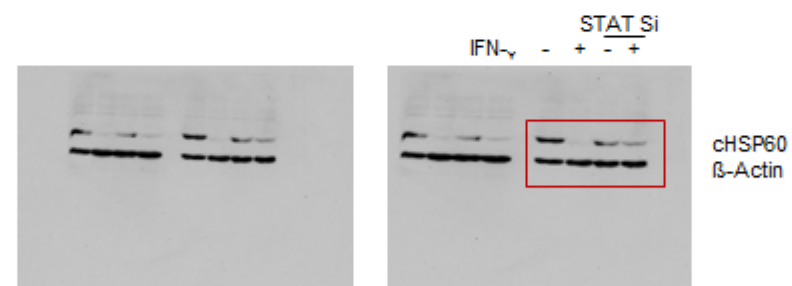

Supplement: fig1-figsupp1-data1 [file elife-76721-fig1-figsupp1-data1-v1.pdf]
