# Supplementary material for: c-Myc plays a key role in IFN-γ-induced persistence of Chlamydia trachomatis
Source: eLife journal article supplement (doi:10.7554/elife.76721), 2022-09-13
Supplement: fig3-data1 [file elife-76721-fig3-data1-v1.pdf]

**Figure 3 A**

|               |   |    |    |    |    |    |    |    |
|---------------|---|----|----|----|----|----|----|----|
| IFN- $\gamma$ | - | -  | -  | -  | ++ | ++ |    |    |
| AHT           | - | -  | ++ | ++ | -  | -  | ++ | ++ |
| Ctrl Hpi      | 0 | 30 | 0  | 30 | 0  | 30 | 0  | 30 |

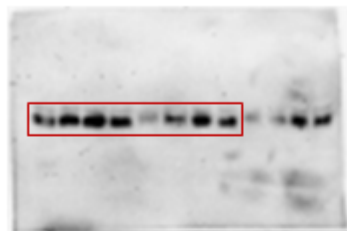

c-Myc

|               |   |    |    |    |    |    |    |    |
|---------------|---|----|----|----|----|----|----|----|
| IFN- $\gamma$ | - | -  | -  | -  | ++ | ++ |    |    |
| AHT           | - | -  | ++ | ++ | -  | -  | ++ | ++ |
| Ctrl Hpi      | 0 | 30 | 0  | 30 | 0  | 30 | 0  | 30 |

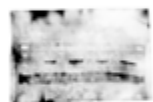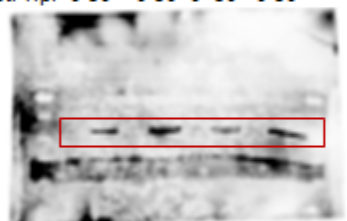

OmpA

|               |   |    |    |    |    |    |    |    |
|---------------|---|----|----|----|----|----|----|----|
| IFN- $\gamma$ | - | -  | -  | -  | ++ | ++ |    |    |
| AHT           | - | -  | ++ | ++ | -  | -  | ++ | ++ |
| Ctrl Hpi      | 0 | 30 | 0  | 30 | 0  | 30 | 0  | 30 |

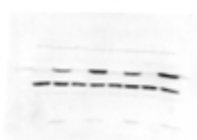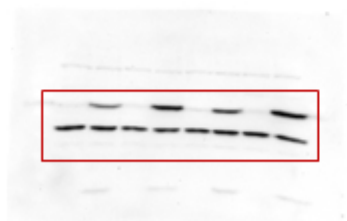

cHSP60  
 $\beta$ -Actin
