# Supplementary material for: c-Myc plays a key role in IFN-γ-induced persistence of Chlamydia trachomatis
Source: eLife journal article supplement (doi:10.7554/elife.76721), 2022-09-13

**Figure 3 – figure supplement 1 A**

|               |   |    |    |    |    |
|---------------|---|----|----|----|----|
| IFN- $\gamma$ | - | -  | -  | +  | +  |
| AHT           | - | -  | +  | -  | +  |
| Ctrl Hpi      | 0 | 30 | 30 | 30 | 30 |

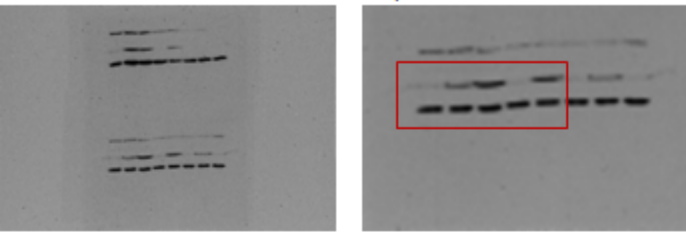

**Figure 3 – figure supplement 1 C**

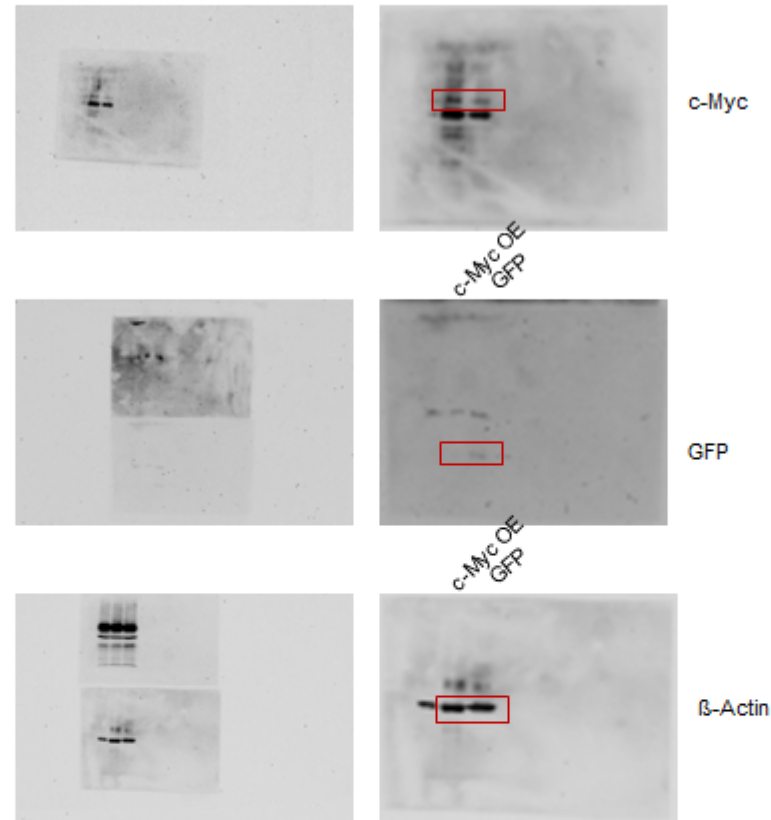

**Figure 3 – figure supplement 1 D**

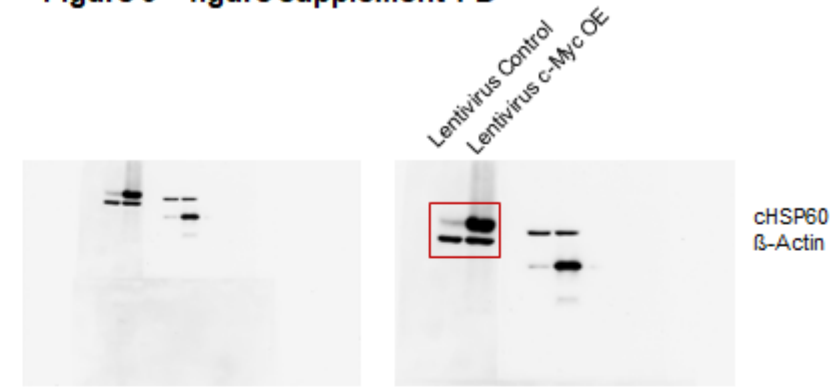

**Figure 3 – figure supplement 1 E**

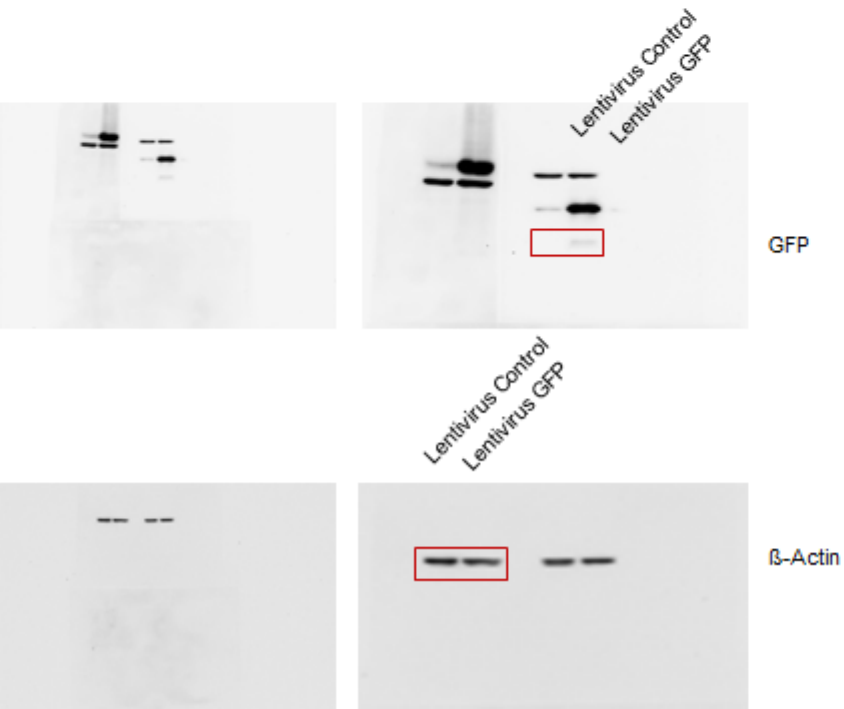

Supplement: fig3-figsupp1-data1 [file elife-76721-fig3-figsupp1-data1-v1.pdf]
