# Supplementary material for: c-Myc plays a key role in IFN-γ-induced persistence of Chlamydia trachomatis
Source: eLife journal article supplement (doi:10.7554/elife.76721), 2022-09-13

**Figure 5 A**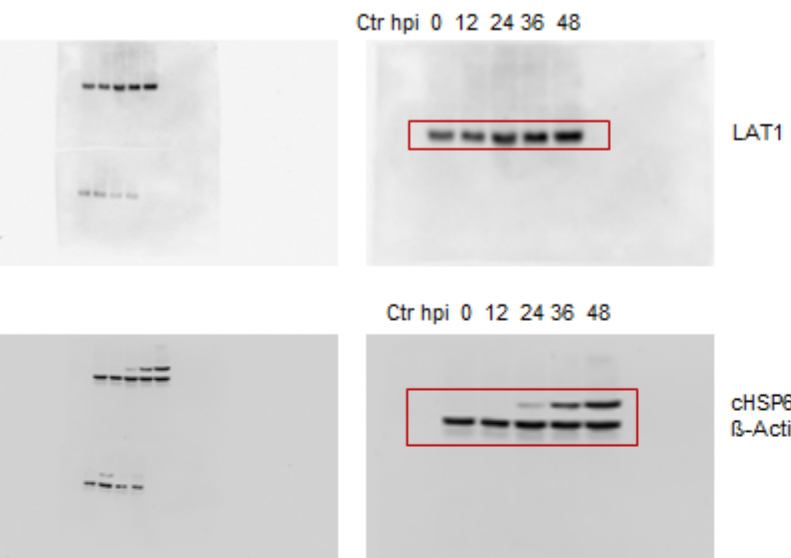**Figure 5 B**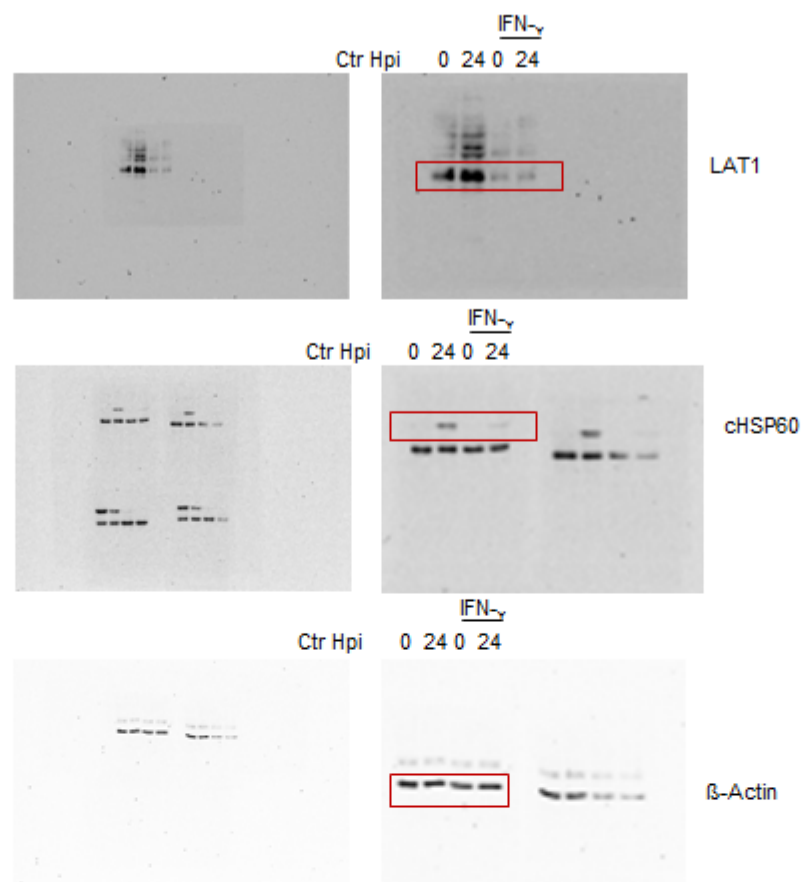**Figure 5 C**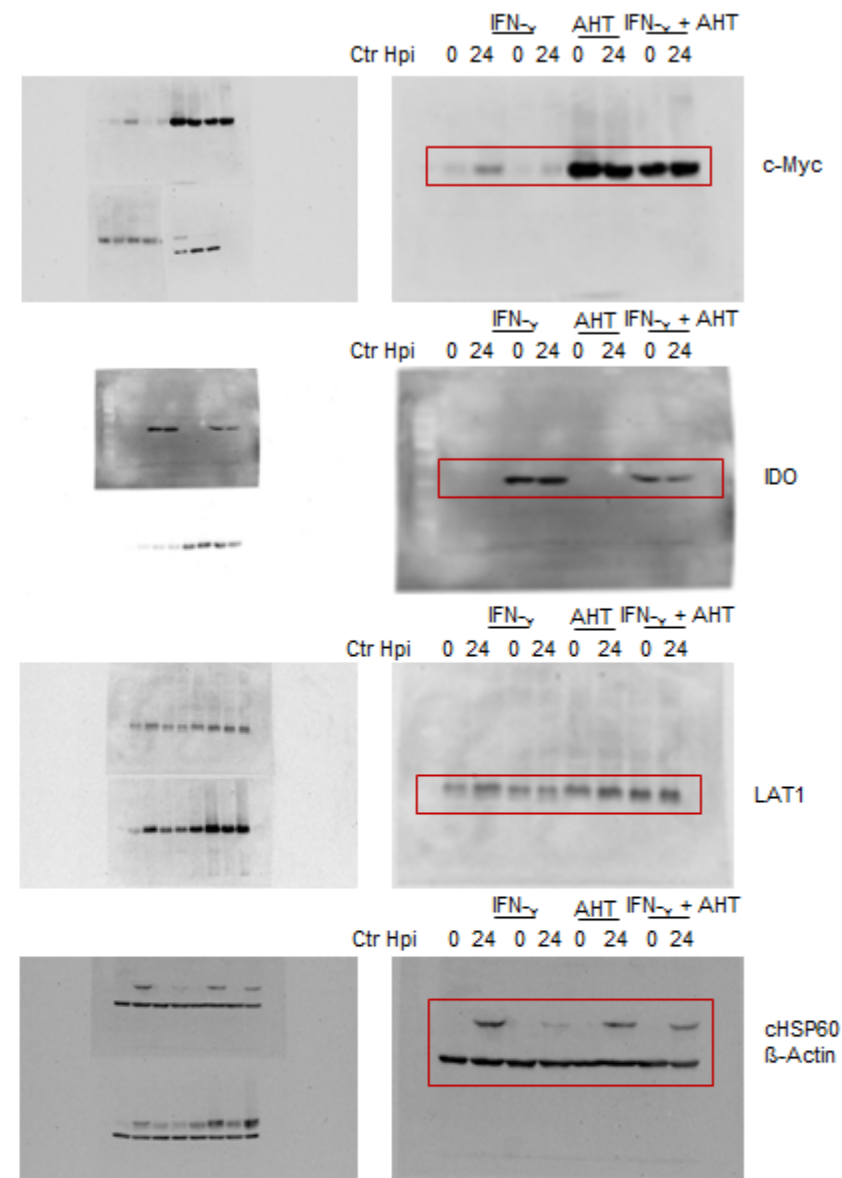**Figure 5 D**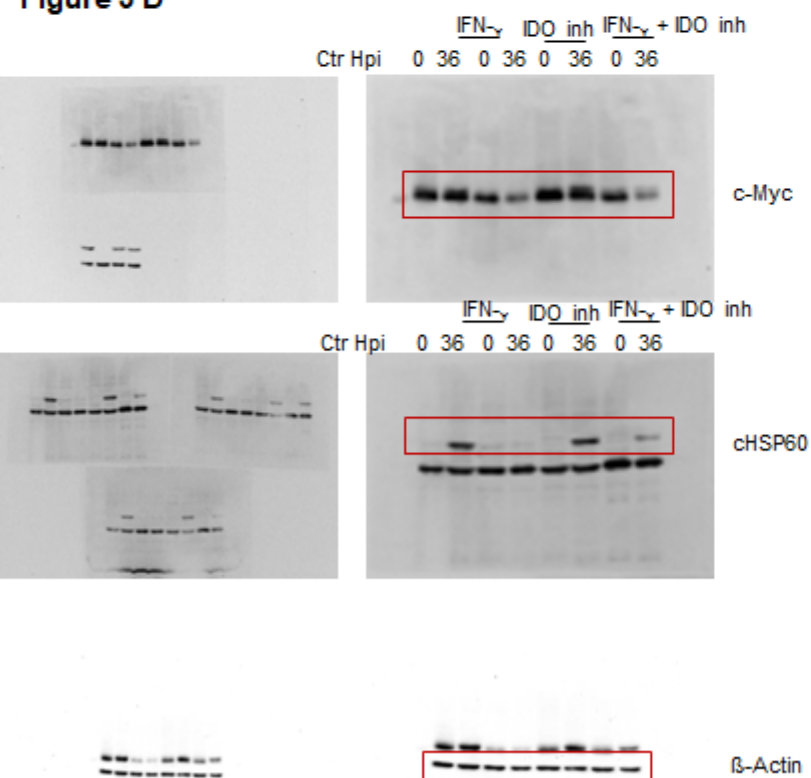**Figure 5 E**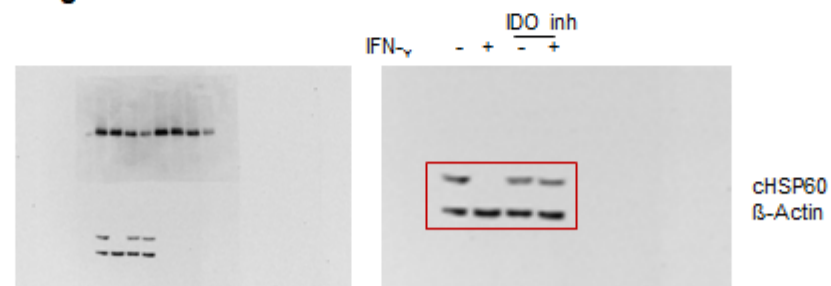

Supplement: fig5-data1 [file elife-76721-fig5-data1-v1.pdf]
