# Supplementary material for: c-Myc plays a key role in IFN-γ-induced persistence of Chlamydia trachomatis
Source: eLife journal article supplement (doi:10.7554/elife.76721), 2022-09-13

**Figure 6 D**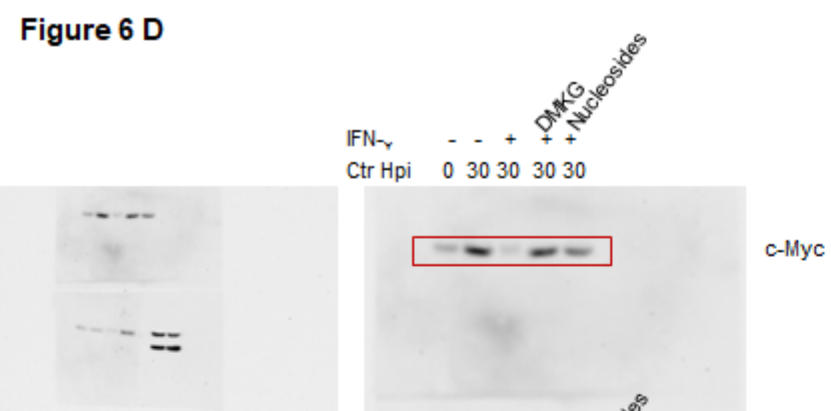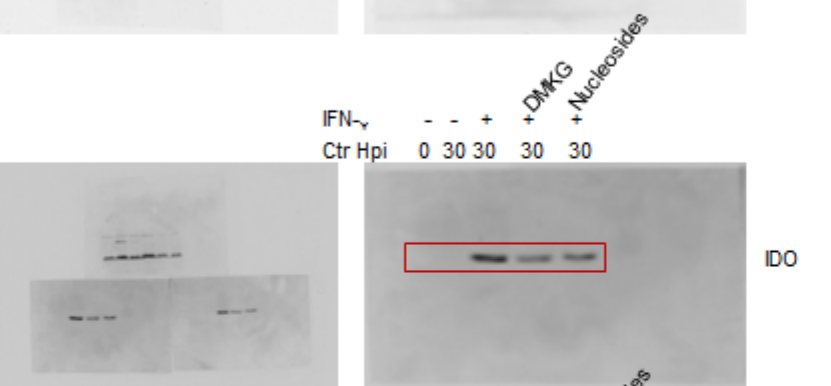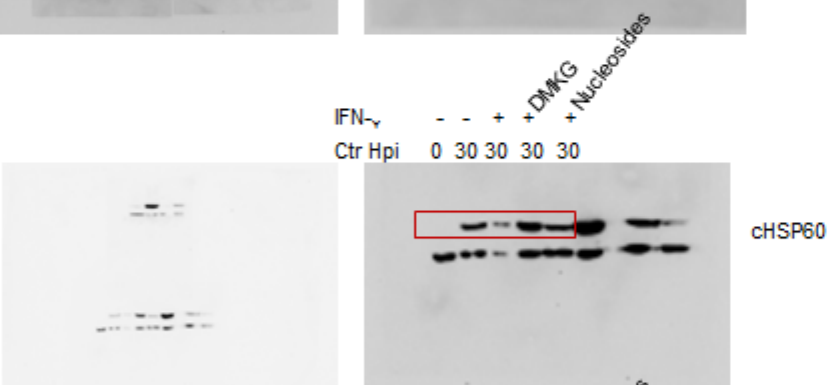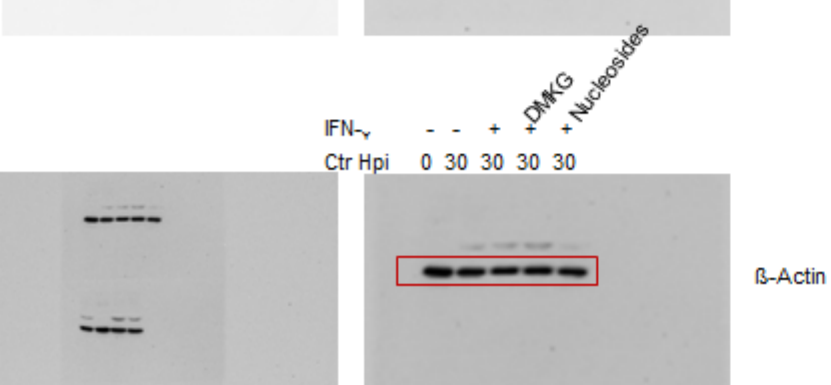**Figure 6 E**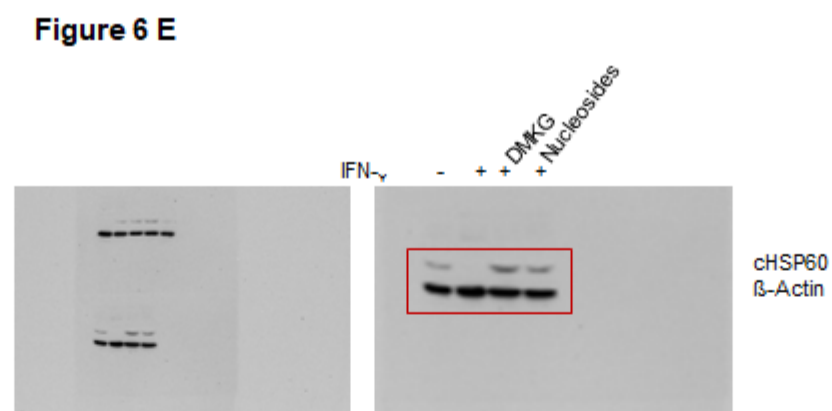**Figure 6 G**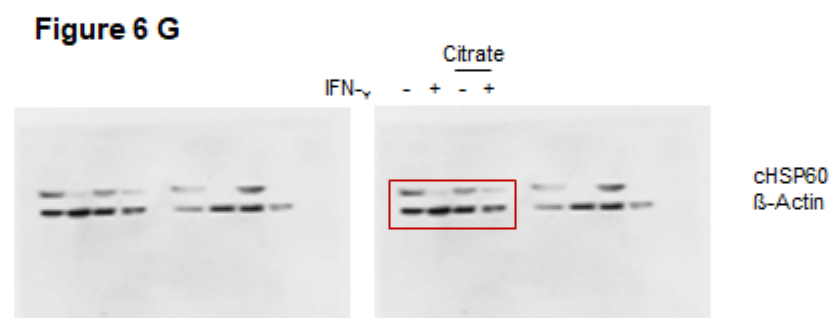**Figure 6 F**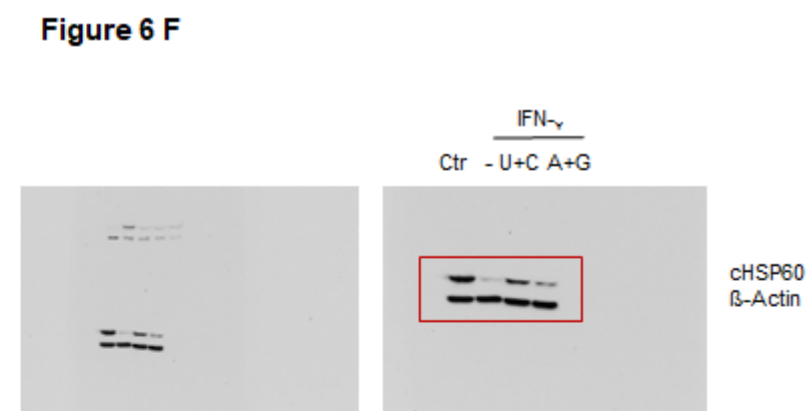**Figure 6 H**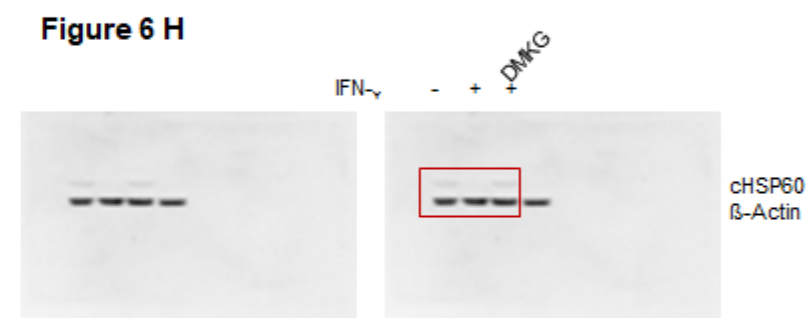

Supplement: fig6-data1 [file elife-76721-fig6-data1-v1.pdf]
