# Supplementary material for: c-Myc plays a key role in IFN-γ-induced persistence of Chlamydia trachomatis
Source: eLife. 2022 Sep 26;11:e76721. doi: 10.7554/eLife.76721 (PMC9512400; doi:10.7554/eLife.76721)
Supplement: Source data 1. [file elife-76721-data1.xlsx]

## Sheet: siSTAT1 Experiment
												Average cells	Average inclusions		Inclusions/cells
	1. Experiment siSTAT1		2° inf 1:100
	12 well-plate HeLa229			Cells			Inclusions
			CtrL2	70	63	65	64	54	57			66	58.3333		0.883838
			IFN-γ	65	72	75	9	16	14			70.6667	13		0.183962
			siSTAT1	53	60	65	42	48	57			59.3333	49		0.825843
			IFN-γ siSTAT1	55	62	57	27	30	28			58	28.3333		0.488506
	2. Experiment siSTAT1		2° inf 1:100
	12 well-plate HeLa229			Cells			Inclusions
			CtrL2	78	75	79	60	65	72			77.3333	65.6667		0.849138
			IFN-γ	72	80	76	11	10	8			76	9.66667		0.127193
			siSTAT1	65	68	70	40	43	54			67.6667	45.6667		0.674877
			IFN-γ siSTAT1	67	64	68	25	20	35			66.3333	26.6667		0.40201
	3. Experiment siSTAT1		2° inf 1:100
	12 well-plate HeLa229			Cells			Inclusions
			CtrL2	88	109	97	18	34	26			98	26		0.265306
			IFN-γ	76	66	43	2	1	0			61.6667	1		0.0162162
			siSTAT1	99	84	106	13	12	48			96.3333	24.3333		0.252595
			IFN-γ siSTAT1	60	63	71	12	14	5			64.6667	10.3333		0.159794

## Sheet: IFN Nucleosides
												Average cells	Average inclusions		Inclusions/cells
	1. Experiment IFN Nucleosides		2° inf 1:100
	12 well-plate HeLa229			Cells			Inclusions
			CtrL2	45	40	33	37	35	28			39.3333	33.3333		0.847458
			IFN-γ	59	55	50	0	1	2			54.6667	1		0.0182927
			IFN-γ Nucleosides	42	55	54	7	15	12			50.3333	11.3333		0.225166
			IFN-γ A,G	52	45	48	5	8	9			48.3333	7.33333		0.151724
			IFN-γ C,U	33	53	48	1	7	2			44.6667	3.33333		0.0746269
	2. Experiment IFN Nucleosides		2° inf 1:100
	12 well-plate HeLa229			Cells			Inclusions
			CtrL2	50	43	53	48	37	46			48.6667	43.6667		0.89726
			IFN-γ	61	54	52	0	2	1			55.6667	1		0.0179641
			IFN-γ Nucleosides	41	51	67	13	17	25			53	18.3333		0.345912
			IFN-γ A,G	45	47	56	4	5	4			49.3333	4.33333		0.0878378
			IFN-γ C,U	47	65	54	5	2	1			55.3333	2.66667		0.0481928
	3. Experiment IFN Nucleosides		2° inf 1:100
	12 well-plate HeLa229			Cells			Inclusions
			CtrL2	45	52	50	42	46	37			45.3333	41.6667		0.919118
			IFN-γ	43	45	33	0	1	0			40.3333	0.333333		0.00826446
			IFN-γ Nucleosides	67	46	55	6	4	10			31.3333	6.66667		0.212766
			IFN-γ A,G	58	34	60	18	0	1			28.5	6.33333		0.222222
			IFN-γ C,U	51	42	45	2	1	4			24.1667	2.33333		0.0965517

## Sheet: IFN Nucleosides WII
												Average cells	Average inclusions		Inclusions/cells
	1. Experiment IFN Nucleosides		2° inf 1:100
	12 well-plate WII			Cells			Inclusions
			CtrL2	40	40	37	26	22	24			39	24		0.615385
			IFN-γ	53	54	56	2	3	4			54.3333	3		0.0552147
			IFN-γ DMKG	27	31	24	19	21	15			27.3333	18.3333		0.670732
			IFN-γ Nucleosides	45	32	37	15	14	13			38	14		0.368421
	2. Experiment IFN Nucleosides		2° inf 1:100
	12 well-plate WII			Cells			Inclusions
			CtrL2	38	46	41	21	24	24			41.6667	23		0.552
			IFN-γ	63	49	65	8	7	6			59	7		0.118644
			IFN-γ DMKG	42	25	34	30	15	20			33.6667	21.6667		0.643564
			IFN-γ Nucleosides	47	44	41	5	10	10			44	8.33333		0.189394
	3. Experiment IFN Nucleosides		2° inf 1:100
	12 well-plate WII			Cells			Inclusions
			CtrL2	36	38	33	23	20	15			27.5	19.3333		0.70303
			IFN-γ	55	59	51	2	4	4			55	3.33333		0.0606061
			IFN-γ DMKG	24	34	32	17	16	20			30	17.6667		0.588889
			IFN-γ Nucleosides	41	32	42	17	11	6			24.8333	11.3333		0.456376

## Sheet: IDO inh IFN
												Average cells	Average inclusions		Inclusions/cells
	1. Experiment IDO inh IFN		2° inf 1:1000
	12 well-plate HeLa229			Cells			Inclusions
			CtrL2	50	70	68	36	57	35			62.6667	42.6667		0.680851
			IFN-γ	74	76	50	1	0	0			66.6667	0.333333		0.005
			IDO inh	77	79	81	30	68	35			79	44.3333		0.561181
			IFN-γ IDO inh	92	73	65	20	50	18			76.6667	29.3333		0.382609
	2. Experiment IDO inh IFN		2° inf 1:1000
	12 well-plate HeLa229			Cells			Inclusions
			CtrL2	73	82	76	24	32	44			77	33.3333		0.4329
			IFN-γ	80	66	81	0	0	1			75.6667	0.333333		0.00440529
			IDO inh	68	57	58	22	19	23			61	21.3333		0.349727
			IFN-γ IDO inh	57	85	55	18	16	16			65.6667	16.6667		0.253807
	3. Experiment IDO inh IFN		2° inf 1:100
	12 well-plate HeLa229			Cells			Inclusions
			CtrL2	58	71	74	47	47	48			67.6667	47.3333		0.699507
			IFN-γ	38	63	59	0	1	0			53.3333	0.333333		0.00625
			IDO inh	50	61	59	29	37	35			56.6667	33.6667		0.594118
			IFN-γ IDO inh	76	61	74	29	30	26			70.3333	28.3333		0.402844

## Sheet: IFN Indole TrpBA
												Average cells	Average inclusions		Inclusions/cells
	1. Experiment IFN Indole TrpBA		2° inf 1:1000
	12 well-plate HeLa229			Cells			Inclusions
			CtrL2	80	73	68	44	32	37			73.6667	37.6667		0.511312
			IFN-γ	58	77	83	11	13	15			72.6667	13		0.178899
			IFN-γ Indole	66	63	67	46	20	18			65.3333	28		0.428571
			TrpBA mut	74	59	73	4	12	15			68.6667	10.3333		0.150485
			IFN-γ	86	70	50	1	1	0			68.6667	0.666667		0.00970874
			IFN-γ Indole	79	49	80	0	1	1			69.3333	0.666667		0.00961538
	2. Experiment IFN Indole TrpBA		2° inf 1:1000
	12 well-plate HeLa229
			CtrL2												0.490244
			IFN-γ												0.139108
			IFN-γ Indole												0.34
			TrpBA mut												0.451902
			IFN-γ												0.0160428
			IFN-γ Indole												0.0120482
	3. Experiment IFN Indole TrpBA		2° inf 1:1000
	12 well-plate HeLa229
			CtrL2												0.471491
			IFN-γ												0.153488
			IFN-γ Indole												0.242268
			TrpBA mut												0.430622
			IFN-γ												0.0193906
			IFN-γ Indole												0.0104167

## Sheet: IFN DMKG TrpBA
											Average cells	Average inclusions		Inclusions/cells
1. Experiment IFN DMKG TrpA mutante		2° inf 1:1000
12 well-plate HeLa229
		CtrL2												0.586207
		IFN-γ												0.00369004
		IFN-γ DMKG												0.240506
		TrpBA mut												0.531
		IFN-γ												0.008
		IFN-γ DMKG												0.209
2. Experiment IFN DMKG TrpA mutante		2° inf 1:1000
12 well-plate HeLa229
		CtrL2												0.773585
		IFN-γ												0.00576369
		IFN-γ DMKG												0.270677
		TrpBA mut												0.755396
		IFN-γ												0.00819672
		IFN-γ DMKG												0.278287
3. Experiment IFN DMKG TrpA mutante		2° inf 1:1000
12 well-plate HeLa229
		CtrL2												0.579096
		IFN-γ												0.00369004
		IFN-γ DMKG												0.200855
		TrpBA mut												0.56746
		IFN-γ												0.00621118
		IFN-γ DMKG												0.193548

## Sheet: TrpBA IFN c-Myc OE
															Inclusions/cells
	1. Experiment IFN c-Myc OE TrpBA		2° inf 1:1000
	12 well-plate WII
			CtrL2												0.141667
			IFN-γ												0.049861
			c-Myc OE												0.148551
			IFN-γ c-Myc OE												0.155629
			TrpBA mut												0.155405
			IFN-γ												0.023952
			c-Myc OE												0.153333
			IFN-γ c-Myc OE												0.120833
	2. Experiment IFN c-Myc OE TrpBA		2° inf 1:1000
	12 well-plate WII
			CtrL2												0.12069
			IFN-γ												0.0518732
			c-Myc OE												0.106061
			IFN-γ c-Myc OE												0.102113
			TrpBA mut												0.113208
			IFN-γ												0.0328358
			c-Myc OE												0.109023
			IFN-γ c-Myc OE												0.108333
	3. Experiment IFN c-Myc OE TrpBA		2° inf 1:1000
	12 well-plate WII
			CtrL2												0.158249
			IFN-γ												0.0553936
			c-Myc OE												0.135048
			IFN-γ c-Myc OE												0.101961
			TrpBA mut												0.130031
			IFN-γ												0.0306905
			c-Myc OE												0.119403
			IFN-γ c-Myc OE												0.078176

## Sheet: Organoids recovery Experiment
												Average cells	Average inclusions		Inclusions/cells
	1. Experiment Organoids IFN recovery		2° inf 1:100
	12 well-plate HeLa229			Cells			Inclusions
			CtrL2	90	98	96	11	15	20			94.6667	15.3333		0.161972
			IFN-γ	67	81	84	0	4	3			77.3333	2.33333		0.0301724
			IFN-γ +/-	99	79	81	5	3	7			86.3333	5		0.0579151
	2. Experiment Organoids IFN recovery		2° inf 1:100
	12 well-plate HeLa229
			CtrL2												0.0437758
			IFN-γ												0.0115145
			IFN-γ +/-												0.0151965
	3. Experiment Organoids IFN recovery		2° inf 1:100
	12 well-plate HeLa229
			CtrL2												0.195537
			IFN-γ												0.04158
			IFN-γ +/-												0.086784
	4. Experiment Organoids IFN recovery		2° inf 1:100
	12 well-plate HeLa229
			CtrL2												0.39
			IFN-γ												0.18
			IFN-γ +/-												0.22
	5. Experiment Organoids IFN recovery		2° inf 1:100
	12 well-plate HeLa229
			CtrL2												0.52
			IFN-γ												0.23
			IFN-γ +/-												0.26

## Sheet: CtrD IFN
												Average cells	Average inclusions		Inclusions/cells
	1. Experiment CtrD IFN		2° inf 1:100
	12 well-plate HeLa229			Cells			Inclusions
			CtrD	110	107	115	20	19	15			110.667	18		0.162651
			IFN-γ 10ng/ml	120	110	119	1	2	2			116.333	1.66667		0.0143266
			IFN-γ 50ng/ml	112	82	97	0	0	1			97	0.333333		0.00343643
	2. Experiment CtrD IFN		2° inf 1:100
	12 well-plate HeLa229			Cells			Inclusions
			CtrL2	36	77	73	8	13	23			62	14.6667		0.236559
			IFN-γ 10ng/ml	141	150	138	0	3	2			143	1.66667		0.011655
			IFN-γ 50ng/ml	95	84	86	0	0	3			88.3333	1		0.0113208
	3. Experiment CtrD IFN		2° inf 1:100
	12 well-plate HeLa229			Cells			Inclusions
			CtrL2	115	100	105	25	16	19			106.667	20		0.1875
			IFN-γ 10ng/ml	107	96	120	0	2	0			107.667	0.666667		0.00619195
			IFN-γ 50ng/ml	143	140	149	1	0	2			144	1		0.00694444

## Sheet: Pen IFN
												Average cells	Average inclusions		Inclusions/cells
	1. Experiment Pen IFN		2° inf 1:100
	12 well-plate HeLa229			Cells			Inclusions
			CtrL2	78	53	75	48	40	49			68.6667	45.6667		0.665049
			Pen	74	64	82	2	1	0			73.3333	1		0.0136364
			IFN-γ	99	76	71	3	1	3			82	2.33333		0.0284553
	2. Experiment Pen IFN		2° inf 1:100
	12 well-plate HeLa229			Cells			Inclusions
			CtrL2	50	53	60	43	44	46			54.3333	44.3333		0.815951
			Pen	83	97	80	0	0	1			86.6667	0.333333		0.00384615
			IFN-γ	43	68	56	2	4	1			55.6667	2.33333		0.0419162
	3. Experiment Pen IFN		2° inf 1:100
	12 well-plate HeLa229			Cells			Inclusions
			CtrL2	53	63	66	39	40	47			60.6667	42		0.692308
			Pen	90	79	68	0	3	0			79	1		0.0126582
			IFN-γ	96	69	81	0	2	3			82	1.66667		0.0203252

[truncated: 3 more sheets: Organoids OE c-Myc, Five patients organoids IFN , c-Myc depletion Experiment]
