# Supplementary material for: c-Myc plays a key role in IFN-γ-induced persistence of Chlamydia trachomatis
Source: eLife. 2022 Sep 26;11:e76721. doi: 10.7554/eLife.76721 (PMC9512400; doi:10.7554/eLife.76721)
Supplement: Source data 2. [file elife-76721-data2.xlsx]

## Sheet: Metabolic profiling
SampleID		Control_1	Control_2	Control_3	Infected_1	Infected_2	Infected_3	IFN_1	IFN_2	IFN_3	IFN+infected_1	IFN+infected_2	IFN+infected_3	Myc_1	Myc_2	Myc_3	Myc+infected_1	Myc+infected_2	Myc+infected_3	MYC+IFN_1	MYC+IFN_2	MYC+IFN_3	MYC+IFN+infected_1	MYC+IFN+infected_2	MYC+IFN+infected_3
Group	Ionization mode	Control	Control	Control	Infected	Infected	Infected	IFN	IFN	IFN	IFN+infected	IFN+infected	IFN+infected	Myc	Myc	Myc	MYC+infected	MYC+infected	MYC+infected	MYC+IFN	MYC+IFN	MYC+IFN	MYC+IFN+infected	MYC+IFN+infected	MYC+IFN+infected
(Iso)Leucine	neg	3.15306e+06	3.9897e+06	3.47522e+06	7.71366e+06	5.61432e+06	5.64821e+06	6.31377e+06	5.70584e+06	3.01329e+06	3.19633e+06	3.23511e+06	3.26933e+06	5.27314e+06	5.36366e+06	4.70862e+06	5.02234e+06	5.04968e+06	5.23509e+06	5.81126e+06	5.69128e+06	5.62969e+06	5.86033e+06	6.84459e+06	6.47232e+06
(Iso)Leucine	pos	72203.8	71069.2	103101	79758	96720	101650	88473.5	90470.3	67722.5	77178.3	75551.6	65261.6	85937.7	86566.4	88278.7	87591.7	90029	100798	92574.6	76870	91070.7	86963.9	115009	111159
3-Phosphoglycerate	neg	90597.8	114420	92216.6	166267	128866	140578	104755	93185.9	84153.6	74916.1	72805.7	89462	128413	122198	105307	135114	140691	128403	117769	107157	113219	133565	158882	138624
3-Phosphohydroxypyruvate	neg	326.701	732.115	751.495	800.383	490.489	1074.58	1037.82	1988.9	1619.81	1499.63	1188.96	1308.22	1633.53	1992.38	2817.2	1658.41	1200.43	1005.38	1790.24	2694.17	2573.55	1207.14	973.737	1021.12
a-Ketoglutarate	neg	18344.9	25533.7	17409.2	41462.8	26368.6	29735.2	14229.8	11260.9	13858.5	19195.5	15122.5	17276.5	13922.6	15964.5	12475.7	28968.5	26610.3	30437.4	16543.8	13721.7	14941.9	39495.4	60636.2	30335.7
Acetoacetate	neg	395367	638552	544512	1.55215e+06	711631	708444	662736	561685	365208	430391	402368	438708	562524	535354	479486	488440	514374	519204	648511	589710	590531	634491	831690	673694
Aconitate	neg	84578.4	140821	95156.5	285933	197808	226777	39655.9	23321.5	78963.7	141405	116664	120761	55542	50613.6	37943.3	355210	319839	350024	50604.5	41105.6	37612.7	386198	467428	378719
Adenine	neg	174159	206552	164630	281302	216694	194359	188461	155374	91365.5	95885.9	103387	99617.9	151325	142862	124974	117965	147146	137232	167246	153543	147792	155967	199343	179385
Adenine	pos	11219.8	9479.95	12865.1	7978.11	9816.99	9352.17	7013.85	6126.23	4635.63	5603.61	6246.12	4990.85	6364.67	5299.11	5169.44	4390.14	5415.99	5318.13	6124.71	4666.35	5178.74	4395.49	7035.49	6146.03
Adenosine	neg	2819.06	4192.14	3932.42	7047.35	4833.59	4580.67	52845.1	47465.1	5813.8	3617.87	4029.28	4253.05	39073.2	41755.4	37755.2	13646.8	14861	17649.2	49892.9	47281.8	47701.4	22363.6	20559.2	20420.5
Adenosine	pos	219.505	246.853	511.737	289.683	306.01	261.742	2975.67	3004.66	360.289	350.726	303.613	269.492	3894.99	3696.38	4554.86	336.03	385.664	440.265	5646.44	4457.46	5362.76	526.868	1056.7	757.024
ADP	neg	324046	392613	353174	660453	508754	474588	599436	537170	236874	273217	275123	258853	524409	517534	452759	319956	310665	309675	495495	503223	480007	364493	412697	380950
ADP	pos	1711.42	1574.36	2648.54	1618.65	1963.82	1913.82	3590.43	3902.99	1422.87	1642.76	1537.72	1183.92	3850.68	3713.14	3987.01	1233.91	1294.5	1257.43	3839.85	3424.81	3681.82	1269.81	1718.96	1578.81
Alanine	neg	354003	479210	399100	905610	712178	736681	554208	508878	365676	441899	421909	440032	551750	584868	480970	730814	744470	800691	586144	609263	585859	837646	1.00941e+06	931696
Alanine	pos	9258.22	9757.84	13369.7	10831.3	14256	15507.1	6278.81	6836.67	8998.8	12169.4	11305.4	9924.51	8147.94	8465.35	8023.65	14330.6	14514.2	15735.8	7934.29	6997	8089.56	13173.2	18586.6	16963
AMP	neg	53428	62368.6	62550.3	99276.5	64775.3	51426.5	362295	307742	38585.2	32837.8	30592.6	25577.5	345149	321519	292990	21166.1	16798.8	16162.3	452318	431700	405140	21721.5	25105.7	24081.8
AMP	pos	1254.7	1029.68	1692.83	818.664	946.857	794.057	3467.47	3696.4	735.271	666.661	584.189	430.496	3891.18	3536.98	3962.73	347.529	303.866	279.733	4690.51	4200.24	4420.6	286.855	377.011	356.298
Arginine	neg	54719.8	75486.2	70547.9	945.736	0	170.368	171611	145542	53095.2	329.972	248.715	16.9194	141250	140751	125444	619.44	117.111	198.716	161114	153317	154736	1644.29	3664.24	421.403
Arginine	pos	10309.7	10657.9	16614.4	1037.29	660.14	397.03	12954.9	14410.3	9080	1400.12	630.514	284.748	12637.9	12803.8	13894.8	1331.91	439.664	320.262	12407.9	10958.6	13386.9	1214.98	818.123	406.112
Asparagine	neg	4050.33	6722.28	5806.76	44379.4	38385.5	39603.3	12308.5	11758.8	8171.54	24036.1	20348.9	22925	10751.3	11032.6	10542.6	34713.8	33038.9	35972.6	13549.9	11787.2	11902.9	36982	45420.4	40462
Asparagine	pos	48.4848	71.5384	87.5949	429.86	579.916	626.322	86.6621	87.2703	52.3139	521.343	475.797	435.246	89.6525	68.5662	99.5339	580.899	555.346	580.787	97.3496	85.0655	104.653	504	710.151	643.328
Aspartate	neg	202964	305668	203760	726450	663928	693124	114868	106502	173699	469578	397590	450756	114048	113893	106732	358000	309103	346286	112123	108895	114089	367412	470147	394918
Aspartate	pos	240.517	311.183	315.865	452.847	689.721	798.414	77.6965	76.9043	223.775	763.384	611.445	574.095	115.26	88.9172	99.5017	489.515	485.708	538.05	66.7139	67.1871	88.8392	400.606	679.593	522.401
ATP	neg	445811	619901	482182	1.03396e+06	882196	879191	458808	395670	395730	497565	501865	509267	383371	411897	320534	843889	824584	864183	324869	339251	320103	941806	1.08116e+06	988052
ATP	pos	7598.8	8211.22	10719.3	8167.85	11208.1	11935	4786.11	4872.04	6913.02	9092.28	8611.16	7702.56	4786.2	4724.33	4571.32	9997.33	10253.9	11092.5	3976.47	3410.65	3843.27	9223.81	11734.2	11075.4
Biotin	pos	6.85769	4.39487	1.76082	6.36391	2.21745	4.50972	39.9071	42.9603	4.74978	3.07541	3.4208	3.48656	43.6629	49.3138	40.9687	3.02066	0.914979	3.39378	68.8488	49.1685	58.1826	5.23933	2.94238	6.6775
cAMP	pos	1.6865	2.53895	4.99183	1.43566	3.58919	4.80321	21.8096	19.7589	6.63867	4.38121	1.4211	3.94237	19.8692	14.2456	15.4069	6.482	8.63755	9.46512	23.1927	18.0796	19.6728	11.2281	7.77934	8.18982
Carbamoylaspartate	neg	8677.23	13618	9212.07	17691.8	11866.6	15957.4	8335.11	8410.77	6640.49	7245.32	6204.89	6600.07	10056.4	10001.5	8021.06	14841.2	14868.7	14660.2	7127.97	8317.93	8504.24	9056.63	13403.3	8991.87
Carnitine	pos	6004.92	7498.99	8735.13	11379	14818.7	19113.6	8815.78	8477.41	7620.19	13997.4	11066.5	11395.2	7124.79	6902.15	6806.88	18067.5	16867.7	20387.4	6274.65	5570	5727.72	15036.3	23064.8	17819.3
CDP	neg	49096.2	66404.4	61397.4	85439.7	63823.8	62026.8	79577	73777.8	42954.9	35753.2	36840.6	36129.2	74808.1	75890	60100.7	50295.5	49612.2	50854.9	58232.9	59756.9	57107.1	57748.1	68683	62361.2
CDP	pos	101.297	71.0807	185.138	118.214	131.206	148.613	408.781	468.653	110.748	136.339	112.465	98.8887	476.586	473.281	465.17	101.043	108.04	109.629	359.948	352.553	374	141.516	153.862	165.29
Choline	pos	2175.5	2617.18	3863.1	4863.18	3034.6	3450.85	14488.9	11667.3	3316.3	3867.44	3392.29	3550.88	12247.2	10378.4	13104.3	2558.31	2693.61	3719.53	25593.8	21533.5	25009.4	4883.51	8237.09	7276.42
Citrate	neg	3.76518e+06	6.05837e+06	4.30252e+06	1.23182e+07	8.18027e+06	9.32957e+06	3.31275e+06	2.27904e+06	3.58298e+06	5.369e+06	4.76993e+06	5.22964e+06	4.24591e+06	3.96141e+06	2.98372e+06	1.58208e+07	1.52366e+07	1.69565e+07	4.48649e+06	3.42061e+06	3.07604e+06	1.84406e+07	1.93248e+07	1.86e+07
Citrulline	neg	3194.95	3985.2	3261.02	38068.5	27020	27066.5	7818.94	7384.32	3228.92	15886.1	14746	16740.2	5830.67	6781.77	6510.94	29094.6	28406.2	30707.1	7127.51	7518.96	6829.94	37791	36745.9	40056.9
Citrulline	pos	221.316	191.232	334.16	1229.94	1436.3	1494.75	308.246	324.742	216.068	1090.3	1076.8	964.708	274.208	286.266	294.657	1358.86	1404.61	1489.89	281.702	249.822	282.259	1403.34	1692.71	1802.35
CMP	neg	1128.4	1675.97	2696.94	3317.08	1635.12	2022.66	30189.1	26801.1	2411.53	1838.26	1382.04	1434.13	30516	27885.3	25956.4	2271.86	2032.11	1992.55	34685.6	35783.1	32396.5	2913.02	4247.46	3688.68
CMP	pos	97.9682	99.0365	160.637	78.8799	97.9888	135.642	369.119	395.14	103.666	92.2975	92.2687	75.0949	454.236	438.637	453.548	116.042	140.927	151.863	463.945	445.625	480.571	130.664	157.383	144.814
CTP	neg	75890.3	105168	87038	118637	95439.7	91936.6	62645	56634.5	66867.7	55260	54581.9	54803.8	55670.1	61308	43827	88560.5	86813	91275.8	36392.8	39036.6	36960.5	105186	122448	107906
CTP	pos	1676.12	1871.85	2427.71	1211.81	1587.26	1746.37	732.542	781.236	1525.7	1324.82	1270.5	1075.86	739.955	827.8	676.247	1474.11	1483.01	1661.77	496.762	443.76	485.462	1392.76	1840.15	1658.44
Cystathionine	neg	86838	120559	103376	283483	241677	243523	101647	88533.1	107427	160962	163030	165963	98303.2	100164	86448.6	175294	167548	177068	114376	115153	115983	224689	254695	240748
Cystathionine	pos	1399.5	1482.09	2052.24	2116.47	2944.32	3274.92	1118.59	1182.76	1670.98	2927.61	2825.7	2482.58	1334.93	1365.06	1292.85	2586.35	2597.29	2948.3	1457.16	1348.2	1574.03	2820.16	3798.08	3575
Cysteine	neg	127.627	150.371	74.2994	67.73	422.278	330.201	837.163	544.469	286.315	374.792	437.398	528.02	1177.32	1551.91	1506.75	1768.29	1759.53	2398.87	2611.93	5280.24	4099.07	4655.29	1910.74	2825.97
Cysteine	pos	10.4087	13.0367	29.2729	21.6314	49.7994	58.8599	23.2984	47.5528	64.42	86.3502	92.3763	65.2548	47.2977	58.3032	76.6612	111.914	97.5519	109.735	96.6075	88.0606	122.612	105.966	15.4969	79.8294
Cytidine	neg	1.19674e+06	1.56118e+06	1.28236e+06	2.17476e+06	1.73316e+06	1.69688e+06	1.95819e+06	1.66091e+06	973143	890230	885588	893681	1.7147e+06	1.74169e+06	1.52638e+06	1.47381e+06	1.46468e+06	1.55033e+06	1.66929e+06	1.69304e+06	1.67695e+06	1.7215e+06	1.93299e+06	1.79583e+06
Cytidine	pos	39.1926	33.3499	59.4352	30.3586	21.4758	29.5768	403.266	347.817	71.427	63.4093	54.7144	52.7905	391.342	397.816	354.517	100.166	107.866	93.3598	645.76	541.205	597.383	103.362	192.859	93.7404
Cytosine	neg	3262.44	7757.56	5062.74	7175.7	7917.72	8325.52	7128.76	4437.9	3921.51	3268.41	11320.1	4332.27	4015.49	3013.67	3310.42	4085.2	2548.44	2952.16	3657.54	3982.13	3320.52	3716.77	4450.07	3932.29
Cytosine	pos	172048	176035	195499	205490	200928	218419	167060	164235	163431	188052	176190	160806	177579	173377	180596	151981	162215	178572	186008	155184	176893	150560	181831	168818
dAMP	neg	143.187	312.939	273.291	877.752	374.424	527.38	1165.11	1169.31	309.312	328.486	167.262	167.796	1026.74	1013.69	1127.79	453.622	149.909	268.584	1218.16	1415.27	1221.73	221.929	36.7732	327.968
dCMP	neg	11249.6	15949.3	10898	22604.5	17768.3	18907.6	17912.3	16024.6	13142.6	13445.3	13076.8	12670.5	13596.9	15845.3	14945.8	19200.6	17300.7	19661.3	18109.7	15230.1	15597.4	22816.5	783.179	17790.6
Deoxyadenosine	neg	113.195	210.314	182.403	220.391	0	60.003	148.893	333.552	120.568	69.5596	40.8779	103.837	225.243	295.013	71.7495	0	140.978	109.616	237.62	255.649	496.18	43.9872	213.712	235.035
Deoxyadenosine	pos	201.081	174.207	196.607	420.852	153.339	170.223	177.35	191.399	98.8501	212.535	182.426	119.402	150.742	136.533	147.505	120.947	117.859	126.017	134.255	126.139	142.65	87.5993	148.484	149.729
Deoxyguanosine	neg	2819.06	4248.19	4082.96	7396.33	4906.06	4580.67	52911.7	47465.1	5821.43	3742.81	4075.99	4298.56	39113.6	41755.4	37755.2	13673	14861	17649.2	49893.1	47302.4	47783.1	22363.6	20559.2	20432.8
Deoxyguanosine	pos	213.481	246.203	511.737	289.593	303.155	260.106	2975.2	3003.84	359.192	350.702	301.961	269.015	3893.63	3694.24	4554.27	334.91	383.878	438.533	5644.21	4453.48	5361.12	523.63	1053.9	756.883
Deoxyinosine	neg	209.799	357.103	332.662	1880.65	712.383	1425.65	3271.24	2916.04	602.589	640.28	727.269	950.483	3678.93	1574.17	2624.79	884.94	1344.72	1393.55	2355.1	2387.27	2122.88	1527.76	2315.01	3187.25
Deoxyribose-phosphate	neg	16997.1	22724.5	20815.3	50942	27959.1	22528.7	22209.9	18128	14287.5	14289.9	9772.46	13517.2	15839.3	13635.3	12217.5	12261.1	14393.8	11625.4	14256.8	13442	11891	11313.5	14900	13424.6
Deoxyuridine	neg	3594.73	6314.12	6103.86	10677.2	7533.56	9663.26	11508.8	10093.3	5814.73	5804.11	5993.27	5675.84	7667.59	6854.06	8184.95	7336.1	7353.57	8376.33	8666.21	8784.87	7484.58	9885.34	8875.23	7993.32
dGMP	neg	53428	62368.6	62550.3	99276.5	64775.3	51426.5	362295	307742	38585.2	32837.8	30596.1	25577.5	345149	321519	292990	21166.1	16798.8	16162.3	452318	431700	405194	21721.5	25105.7	24081.8
dGMP	pos	1254.7	1029.68	1692.83	818.664	946.857	794.057	3467.47	3696.4	735.271	666.661	584.189	430.496	3891.18	3536.98	3962.73	347.529	303.866	279.733	4690.51	4200.24	4420.6	286.855	377.011	356.298
dGTP	neg	445811	619901	482182	1.03396e+06	882196	879191	458808	395670	395730	497565	501865	509267	383371	411897	320534	843889	824584	864183	324869	339251	320103	941806	1.08116e+06	988052
dGTP	pos	7603.53	8215.02	10724.7	8171.54	11213.2	11941.4	4788.44	4873.9	6916.52	9096.62	8615.6	7706.38	4788.43	4726.07	4573.07	10001.4	10257.5	11096.2	3978.88	3412	3844.69	9226.56	11737.9	11079.6
Dihydroorotate	neg	9168.87	11844.4	11156.7	13526.3	13202.6	12909.3	5491.65	3964.01	12964.2	6682.69	12658.1	6863.4	3586.73	3098.65	2320.47	23417.5	29905	30522.3	3158.36	2032.08	2561.47	39520.1	37385.5	26348
Dihydroxyacetone phosphate	neg	370886	490258	444157	665185	550188	476733	906513	803319	329152	278645	268748	264557	736147	734222	614220	549800	563956	533567	658235	695648	668025	553844	600662	547434
dTDP	neg	584.772	425.887	1268.85	4646.54	1929.84	2456.67	3464.61	1473.56	950.718	1226.29	1342.44	1403.36	3869.56	3538.4	2344.97	3381.54	3666.97	3556.01	2368.16	2541.87	2173.18	3906.34	4266.59	4340.18
dTMP	neg	52.3226	185.426	521.644	1617.4	1217.38	893.061	6478.44	5863.07	1161.15	1224.03	978.462	1097.57	6526.54	8481.66	7873.79	604.206	1753.26	1275.53	19471.1	21771	20882.3	2378.24	3085.51	2088.3
Erythrose-4-phosphate	neg	25024.5	32561.4	35942.2	48315.1	43786.3	38334.6	104255	85754.1	32205.2	29028	26461.9	25125.3	69946.7	77610.6	65257.4	34056.8	43996.4	34134.3	73178.4	73332.9	78621.6	51844.6	45530.7	42350.7
Erythrose-4-phosphate	pos	63.0699	53.2129	95.8042	36.2532	60.6999	47.8479	217.747	179.046	61.4634	54.7305	46.0863	34.2074	152.695	143.888	150.649	55.7552	98.5212	64.8839	158.598	127.046	166.367	90.91	76.4177	71.544
FAD	neg	428.845	477.652	318.127	708.791	153.87	353.83	595.605	408.691	193.6	319.587	108.353	190.414	1100.36	863.288	660.787	153.927	568.456	949.165	70.128	774.79	438.856	997.089	1636.4	628.719
FAD	pos	14.1864	14.7516	28.811	11.629	15.8775	11.4252	25.8057	22.1297	14.9612	10.1608	10.4723	8.99686	24.8764	25.6617	28.6118	17.9624	21.9599	24.7859	26.2144	21.4501	29.5703	19.7341	30.4755	24.8305
Fructose-1,6-bisphosphate	neg	416830	602832	631850	1.01132e+06	807394	751727	4.77832e+06	4.4818e+06	797360	550168	522376	474712	4.27095e+06	4.37287e+06	4.06664e+06	833474	764500	650476	4.72485e+06	4.96006e+06	4.81745e+06	804595	748568	703144
Fructose-1,6-bisphosphate	pos	661.652	748.93	1272.68	839.234	1134.08	1159.29	5649.41	6198.45	1460.48	1134.62	1010.93	841.154	6354.36	6185.2	6967.35	1489.73	1401.83	1390.65	7123.81	6417.33	7441.39	1326.14	1593.02	1453.64
Fumarate	neg	33398.9	40022.3	32061.7	65521.6	51121.9	52814.4	19204.1	17969.2	18743.3	29638.7	27236.6	28442.5	18357.9	16574.9	17199.4	33580.3	31625.1	35681.8	19176.2	17499.7	15397.8	51349.5	108701	49280.1
GDP	neg	84251.6	105161	103378	151469	114559	107683	262901	231851	76698.5	67863.2	65127.4	61573.4	199464	206045	172390	104270	106605	104895	179436	190375	177355	127178	136809	128358
GDP	pos	298.688	257.58	550.994	243.068	263.49	297.087	1631.53	1670.1	379.882	271.2	258.925	160.318	1479.34	1412.43	1497.9	285.416	298.961	261.523	1436.02	1323.68	1387.15	318.855	400.928	378.871
Gluconate	neg	273063	352977	301063	445910	314505	325124	1.16735e+06	991921	318245	205241	181689	199565	909003	912455	784160	526028	505739	585453	917557	963878	932743	686607	674353	618294
Glucosamine	pos	1539.52	1661.74	2246.15	2455.89	1343.56	1376.58	901.38	816.519	766.314	784.094	1293.19	938.371	776.801	606.697	565.278	576.556	579.688	694.032	646.762	472.792	479.416	547.246	950.036	1148.42
Glucosamine-phosphate	neg	5312.53	7398.42	5143.5	9200.97	7970.59	7825.88	27054.1	26053.8	7490.65	6815.91	9719.28	8755.29	21541.8	19997.2	18112.7	7794.33	7554.71	9739.36	19159.3	19470.9	18201.9	11743.9	16150.2	18448
Glucosamine-phosphate	pos	91.3831	71.9727	103.089	62.6307	88.6204	124.513	343.636	398.282	139.554	113.109	154.423	128.536	325.01	294.833	316.335	130.747	138.916	137.655	315.337	272.842	328.325	120.978	268.336	248.572
Glutamate	neg	1.35537e+06	1.94851e+06	1.41889e+06	3.44998e+06	2.85423e+06	3.05561e+06	1.39374e+06	1.19844e+06	1.26579e+06	2.0281e+06	1.74701e+06	1.97308e+06	1.44825e+06	1.44005e+06	1.22249e+06	2.65927e+06	2.5094e+06	2.78339e+06	1.34845e+06	1.35306e+06	1.33057e+06	2.73999e+06	3.59829e+06	2.95363e+06
Glutamate	pos	18188.4	20792.3	23990.7	21217.2	30056.1	33727.7	9195.61	9146.45	16369.2	31422.5	25623.2	24874.2	12229.8	11303.1	11169.3	25782.1	26173.9	29327.6	9952.4	8390.75	9782.08	20633.1	33372.5	26934.8
Glutamine	neg	18451.6	26143.6	16520.1	70654.3	36126.6	40031	43729.6	45131.5	21704.1	38607.1	26763.3	32259.5	41122.7	46341	44579.9	41199.9	42636.8	51096.8	63646.5	60029.5	58995.1	53412	89476.2	80493.7
Glutamine	pos	1469.07	1372.36	1347.03	1904.68	1692.22	1923.69	845.041	1024.44	912.158	2299.38	1502.69	1514.23	906.443	902.028	991.2	950.557	940.991	1176.08	989.059	840.066	982.021	901.253	1943.95	1448.45
Glycerol-3-phosphate	neg	23927.3	25219.7	26398.9	40929.1	31429	32354.7	110150	93462.4	25104.1	18854.2	19388.5	22255.2	103242	101175	93342.9	49106.5	48491.3	54860.7	127013	121434	116266	70494.6	81995.3	81933.7
Glycerol-3-phosphate	pos	6.26484	8.05393	9.13554	9.8601	12.1456	12.129	65.2824	59.1652	15.0514	8.31544	5.23204	11.7165	80.3995	61.6365	85.7448	23.1466	25.6429	36.1629	88.4533	76.9593	89.3192	37.6658	60.2323	37.3016
Glycine	neg	388070	509177	442577	878550	664136	665093	980209	863194	418885	394064	387508	397101	780982	797485	692530	788670	790221	857419	876692	856574	863152	978723	1.14967e+06	1.06132e+06
Glycine	pos	8343.24	8452.15	11900.7	8074.12	10390.5	10723.9	11808.8	12126.6	8296.09	8217.13	7951.26	6760.11	11231.3	10895.4	11214.1	11557.6	11840.5	13033.6	11308.2	9897.59	11464.7	11612.5	15728.6	14486.2
GMP	neg	10725	10615	10491.3	13362.5	10948.8	10032.8	75555.9	67550.5	8838.78	4465.92	5666.86	4290.44	52068	51457.3	48023.1	10663.9	9489.55	8178.52	66644.9	65427.4	64147.6	8309.77	8252.51	7600.55
GMP	pos	65.901	48.608	92.2532	62.5364	73.6118	69.9255	578.566	609.567	85.7982	52.4772	48.422	40.2008	469.313	444.342	525.588	90.1526	91.442	76.0053	637.408	553.601	585.379	73.2523	58.8516	70.6313
GSH	neg	996241	1.369e+06	973579	1.86597e+06	1.64037e+06	1.69344e+06	1.30024e+06	1.3084e+06	1.0197e+06	967873	986046	941136	1.06634e+06	1.24937e+06	1.03102e+06	1.60324e+06	1.50479e+06	1.64989e+06	1.17824e+06	973661	1.09971e+06	1.71536e+06	169686	1.46601e+06
GSH	pos	15106.8	16641.7	19341.2	12903.8	18964.2	20847.6	13626.7	15340	16295.7	16460	15793.5	12942.2	12842.9	14415.2	13894.6	20276.3	20045.5	23875.3	13511.2	9928.02	12997.2	17588.3	1207.56	18594.6
GSSG	neg	99631.6	145187	120341	196639	158250	149093	106806	84673.2	73128.8	90797.9	82496	92543.4	113589	107720	82230.4	111288	114276	117658	83033.2	111723	91111.2	116684	381681	169470
GSSG	pos	2199.92	2616.85	3479.92	2012.88	2784.2	2723.53	1592.14	1402	1704.28	2305.73	1882.09	1901.69	1915.82	1635.35	1579.63	1928.87	2045.76	2099.97	1398.67	1601.45	1452.35	1628.42	5720.14	2655.89
GTP	neg	94054.8	118974	107652	168526	141654	133865	153342	132234	77280.5	80569.5	79354.7	78603.9	108600	121674	90108	148877	151188	153047	86173.8	91974.9	82951.2	175593	189261	179475
GTP	pos	2167.95	2281.7	3290.35	1890.28	2541.85	2706.26	2308.37	2349.87	2013.65	2068.53	1963.53	1723.28	1991.52	2073.19	1883.82	2746.05	3001.1	3164.9	1537.53	1397.09	1485.06	2739.73	3399.87	3278.92
Guanine	neg	2044.34	1698.61	2173.73	3343.54	3310.21	2868.59	8188.04	7534.66	963.491	1103.99	2527.46	1682.85	5427.23	4248.82	4335.09	704.791	803.087	616.736	6208.42	5938.6	5278.05	950.716	2854.3	1651.25
Guanine	pos	323.958	324.262	582.024	401.53	471.415	484.364	4832.69	4730.72	519.132	436.551	481.227	372.824	4103.78	3678.23	4176.95	348.516	366.156	399.104	5588.97	4604.9	4985.91	426.13	505.699	628.779
Guanosine	neg	5785.37	9872.43	12613.3	21925.8	15845.7	12975.5	231876	210599	18723.4	10782.5	18047	10962.7	166992	149685	153016	6840.4	7155.04	6822.85	226907	211577	205186	9020.43	6567.91	7563.81
Guanosine	pos	232.83	207.355	588.095	301.606	337.006	338.523	10404.4	10425.5	779.309	430.196	406.696	313.452	8859.89	7956.32	9265.33	269.795	285.695	279.425	12781.6	10457.3	11457.1	247.077	448.334	361.488
Hexosephosphate	neg	213946	261162	219223	432863	370437	351137	809887	751748	264646	253218	238848	247351	578951	604255	571155	273910	264677	279403	656759	701729	662899	332267	387685	356205
Hexosephosphate	pos	102.685	90.549	126.706	96.843	147.9	137.818	186.469	211.09	145.75	160.991	149.046	145.114	169.762	176.004	205.649	136.08	149.737	146.424	199.406	201.001	206.028	164.812	228.441	200.587
Histidine	neg	811278	1.06329e+06	958611	2.26832e+06	1.61306e+06	1.68622e+06	2.30888e+06	1.96616e+06	937994	908440	910201	957388	1.946e+06	2.00791e+06	1.77703e+06	1.79028e+06	1.79728e+06	1.93971e+06	2.23023e+06	2.20504e+06	2.19563e+06	2.30568e+06	2.58202e+06	2.42521e+06
Histidine	pos	98927.5	92994.9	139020	99489	140399	139641	100046	112826	90485.4	108752	103165	86014.9	101763	100328	108493	113813	100416	116134	103272	86478.6	104368	101449	129689	129235
Homocysteine	pos	0	0	0.761247	0.513817	0	0.00200234	0.130009	0.366303	0	0.736884	0.454992	0	0	2.07866	3.7127	3.5395	5.11252	4.51577	3.02765	1.61181	7.91953	8.54863	6.45839	6.63784
Homoserine	neg	1.78117e+06	2.18968e+06	1.89766e+06	4.07315e+06	3.12806e+06	3.075e+06	3.02205e+06	2.62326e+06	1.6019e+06	1.73217e+06	1.70761e+06	1.79037e+06	2.61773e+06	2.74309e+06	2.32708e+06	3.13999e+06	3.08117e+06	3.40494e+06	2.80265e+06	2.86988e+06	2.77401e+06	3.72091e+06	4.42316e+06	4.02392e+06
Homoserine	pos	52632.9	52261.5	74114.7	54117.4	70079.2	72148.9	51349.3	53594.2	45827.7	54309.3	52221.1	44946.6	52341.1	51726.2	52195.1	63395.3	63806.3	69408.4	49415.4	43438.5	49812.4	57266.5	78629.2	74166
Hydroxybutyrate	neg	31668.7	44946	43499.8	109082	54007.3	59248.4	78874.8	61854.8	32871.3	40082.3	32787	37492.4	66058.3	63735.1	50421.3	62094	66305.7	67435.5	73334.4	65960.8	61284	76311.1	116753	85152.5
Hypoxanthine	neg	3217.95	2912.02	666.531	14286.7	8489.84	10021.7	8929.27	8456.27	2890.15	11306.5	9629.08	16738.4	11951.9	9166.57	11786.2	6907.23	2398.97	4820.9	17646.9	16492.6	17791.3	7151.73	7303.65	17460.1
Hypoxanthine	pos	360.346	515.264	933.355	964.871	552.487	751.298	1072.15	888.068	450.173	973.53	966.149	1376.06	1303.16	1104.41	1410.13	474.874	435.396	588.134	2349.52	1794.35	2343.79	552.298	1136.49	811.642
IMP	neg	245.577	559.896	208.438	3218.67	1127.77	1239.65	100.337	182.276	365.258	2369.09	2341.71	3918.72	108.69	140.41	118.634	185.613	351.341	602.231	723.676	655.723	1309.47	116.12	1156	735.856
Inosine	neg	72630.5	135318	109425	432287	117939	129140	195054	144261	76981.9	100792	101002	139970	173655	147546	151425	100759	117564	133361	258926	223194	228349	170980	235849	173763
Inosine	pos	118.387	190.185	298.119	293.26	134.028	163.801	251.113	249.093	127.675	396.843	341.987	567.385	331.007	257.049	465.876	52.6674	65.6749	67.9223	849.157	655.106	890.617	31.8397	269.774	92.3284
Lactate	neg	4.45246e+06	6.33848e+06	6.06875e+06	1.60237e+07	7.50339e+06	7.4051e+06	1.35814e+07	9.84629e+06	4.65548e+06	4.62686e+06	4.17802e+06	4.91588e+06	1.17889e+07	1.17759e+07	8.65071e+06	8.51308e+06	9.10505e+06	1.04469e+07	1.5342e+07	1.3611e+07	1.24842e+07	1.60828e+07	1.91076e+07	1.62567e+07
Lysine	neg	133643	185606	174020	547568	283573	273120	507546	397924	133100	154553	156188	163302	417486	423784	366745	333880	354844	387529	488883	468209	456648	454257	533825	484048
Lysine	pos	7923.99	8212.48	12679.6	11729.5	12772	11833.6	9749.23	10383	6954.34	9131.7	9037.61	7604.15	9939.61	9503.98	10029.6	9528.67	9128.6	10070.3	10201.8	8319.79	9821.5	8641.97	11394	11044.9
Malate	neg	445714	531482	351792	886943	646426	644791	243523	192343	219498	327876	296947	308285	195246	178924	155158	335759	317510	344515	196235	162197	154457	367830	632427	397370
Malate	pos	68.5357	67.636	94.9788	75.8495	93.5868	95.5755	220.209	202.364	65.2281	77.0528	65.5518	67.4455	172.553	169.944	193.3	99.5784	99.5032	103.396	230.273	177.661	222.045	115.554	103.439	115.457
Methionine	neg	290417	350568	298743	663817	487079	508640	643018	584274	284144	276263	280222	286681	532966	563267	496616	523655	524270	551879	600889	602690	599454	625965	664164	673848
Methionine	pos	12247	11710.7	16828.9	13008.1	15735.4	16733.1	16003.7	16383.7	11366.3	12101.3	12018.9	10381.4	15432.3	15743.3	16172.2	15602.9	16086.4	18494	16527.9	13906.4	16753.1	15506.2	20102	19625.8
Mevalonate	neg	26551.1	46708.5	38038.3	110208	43583.8	35107.9	50142.9	36559.7	23210.9	22871.2	19746.5	23790	42371.4	39068.7	33177.4	35532	57414	37518.1	64030.7	52813.7	48604	34598.7	71930.9	45959.8
myo-Inositol	neg	6.24741e+06	9.92774e+06	8.55048e+06	2.40685e+07	1.12331e+07	1.12781e+07	1.10451e+07	9.26957e+06	5.93005e+06	6.53272e+06	6.13024e+06	6.82436e+06	9.11909e+06	8.7104e+06	7.6471e+06	7.65662e+06	8.04493e+06	8.30627e+06	1.04702e+07	9.65757e+06	9.56082e+06	1.01604e+07	1.10043e+07	1.03479e+07
myo-Inositol	pos	14.9673	10.0366	22.9401	9.38466	17.3622	21.6873	9.61852	13.343	16.6934	20.4413	23.4634	12.0667	10.0289	7.28777	12.3464	12.3526	15.0393	11.2597	15.3747	6.69826	14.9273	9.97163	7.82158	7.24728
N-Acetylneuraminic acid	neg	17247.4	22654.2	20614.6	48045.4	27374.7	27504.2	29897.2	26078.2	14479.6	18390	16677.2	16633.3	25461.2	23532.8	21202.9	25019	24382.1	28910.1	27631.1	26534.2	28376	32927.4	32273.2	34457.2
N-Acetylneuraminic acid	pos	109.967	121.78	155.416	116.449	113.917	133.32	135.262	149.151	106.863	159.949	123.344	107.653	156.259	155.35	169.65	189.079	159.776	220.592	128.031	149.309	145.668	159.269	257.219	227.719
N-Acetylornithine	neg	1659.85	2524.81	2000.88	5355.75	3177.22	3756.28	5713.3	5432.66	1871.16	2371.98	2261.62	2146.44	3885.54	4766.24	3955.33	4263.54	3910.05	4705.22	4463.27	5497.38	5289.69	6065.85	6441.65	5831.48
N-Acetylornithine	pos	129.202	135.59	135.063	158.339	176.665	179.273	175.249	171.131	111.702	136.03	156.636	120.248	158.362	182.347	188.959	189.957	189.216	243.926	164.833	161.864	179.827	197.533	312.533	246.123
NAD+	neg	45449.9	58671.4	55835.8	60918.8	79074.5	74979.4	53258.6	74622.7	21163.7	18501.4	29962.6	25476.1	42617.2	108553	46288.7	64932.8	68470.6	58938.8	55906.5	81319.8	57924.8	47767	81551.9	42245.3
NAD+	pos	1635.29	1764.75	2374.09	1626.25	2316.63	2303.09	1885.51	1896.95	1333.67	1620.39	1481.22	1389.64	2332.93	2359.63	2312.79	2094.32	2235.45	2566.17	1992.21	1798.67	1969.29	1819.04	3018.62	2471.28
NADH	neg	566.611	1009.43	1259.62	875.446	387.566	1008.11	13208.2	3296.12	740.664	183.337	870.762	387.775	3013.54	12602.2	1229.08	1635.79	2919.09	1665.25	7698.03	7843.86	6008.14	2609.7	1939.4	1952.21
NADH	pos	34.0187	32.242	54.1351	19.7156	22.8675	34.7634	248.738	233.634	36.6625	23.4331	28.3563	24.2903	235.274	264.627	227.434	74.0874	88.4886	92.5563	215.597	175.145	215.117	84.2545	93.2378	115.077
NADP+	neg	572.504	1015.78	482.68	770.643	356.543	403.471	74.3073	339.029	728.417	502.122	361.935	204.723	0	1580.03	682.893	1449.25	1156.93	1437.52	1612.32	1428.17	1912.26	1490.2	1726.39	1570.12
NADP+	pos	17.1161	21.4414	38.9338	22.503	29.9638	32.0607	25.7423	14.6467	25.6523	18.727	16.7519	16.8838	10.0445	30.6761	22.5765	27.3576	45.6671	60.6368	19.5501	23.148	23.6108	53.5722	66.5752	51.6915
NADPH	pos	5.89434	3.24928	0	3.53398	2.87192	4.57655	1.00915	2.41328	8.70834	8.34486	7.20593	5.81426	0	1.29958	0	3.99722	1.56641	0	1.32532	0	0	1.50462	12.8941	8.40844
Nicotinamide	neg	13.2147	224.163	61.9965	133.76	9.85633	183.486	211.586	33.9183	3.78342	0	536.188	27.3957	114.392	195.816	6.29485	1.90075	81.3916	141.135	48.079	134.087	96.3144	54.4513	38.428	63.4063
Nicotinamide	pos	9315.65	10987.3	15362.9	13627.3	11799.1	11993.6	10408	9495.18	7190.81	7790.2	7889.26	7357.25	12899.1	12077.8	11696.7	10270.1	10797.6	13435.3	12385.1	10116.5	11880.4	11097	13765	11754.9
Nicotinate	neg	777.336	809.843	797.284	1760.65	1205.04	1300.82	1001.23	901.192	456.727	884.27	711.518	818.031	658.173	704.836	769.829	1054.35	759.453	1001.08	1303.99	783.965	1055.66	887.678	1661.1	1048.11
Nicotinate	pos	9.12143	8.10492	22.6873	11.2686	13.3623	12.8209	7.12798	8.36659	6.5158	15.8699	11.1189	8.49524	5.06991	5.65884	10.6262	13.7712	15.1969	17.6283	6.51516	5.35291	5.5031	15.1253	12.5106	7.7244
Ornithine	neg	24945.4	36048.9	31638.5	219173	118927	116539	84963.4	69932.4	28211.4	64780.5	64539.2	70793.6	68753.4	67211.5	59396.4	115995	121058	132724	83125.1	78326.7	74665.7	160454	181605	173725
Ornithine	pos	1042.94	1041.61	1612.08	4397.02	4810.18	4650.87	1397.54	1484.84	947.069	3418.5	3458.1	2956.81	1516.33	1439.56	1498.32	3484.8	3237.48	3847.5	1572.29	1271.14	1472.63	3386.27	4098.19	4459.43
Orotate	neg	0	124.366	1064.5	427.52	450.639	319.834	424.799	192.118	358.184	159.446	2144.97	410.397	65.6221	485.178	431.655	56.6445	76.8073	531.443	84.1803	527.271	644.362	131.993	2300.18	65.1912
Oxaloacetate	neg	1282.93	1023.78	313.077	4633.48	2517.36	2393.92	250.159	288.381	917.403	3280.2	2979.49	2616.75	341.693	112.598	777.351	1636.95	2334.07	1482.91	609.923	850.858	1235.86	1872.09	1639.98	2287.34
Oxaloacetate	pos	0.448913	3.87295	5.112	7.43804	1.58595	1.72878	0.385533	2.76347	1.14136	1.05142	4.00679	0	1.34288	0	0	0.294922	1.69523	1.3531	1.77803	0.353012	0	0.393717	0	0
Pantothenate	neg	212345	275090	233018	593864	408220	451587	240654	207888	204957	293780	255721	302241	223811	228211	189827	264444	270228	281413	248769	234167	232125	324860	293333	299762
Pantothenate	pos	2478.29	2775.6	3874.24	2585.18	3135.41	3664.86	3043.82	2590.15	2526.78	2811.94	2543.42	2579.99	3579.88	3357.2	3294.19	3414.01	3539.49	4135.64	3422.99	3076.54	3495.26	3721.75	3614.79	3452.08
Pentose-5-phosphate	neg	50486	74366.6	65437.4	89418.9	73931.8	56640.4	102202	97300.2	47078.7	42507.8	37319.1	38522.7	80970.5	80355.6	78693	33869.1	33211.6	30859.4	84312.3	95721.4	94886.5	36879.6	34097.9	32798.1
Phenolrot	pos	0	0.219374	0	0	0	0	0.622617	1.99724	0.0128118	0	0	0	1.20855	0.455401	1.13002	0	0	0	0.403666	0.873714	2.40153	0	0	0
Phenylalanine	neg	1.19878e+06	1.45397e+06	1.27782e+06	2.83073e+06	2.06833e+06	2.09312e+06	2.5751e+06	2.25221e+06	1.1305e+06	1.1706e+06	1.1966e+06	1.20241e+06	2.16369e+06	2.1977e+06	1.93595e+06	2.07771e+06	2.11765e+06	2.25051e+06	2.31204e+06	2.32366e+06	2.29442e+06	2.4492e+06	2.77343e+06	2.6968e+06
Phenylalanine	pos	38775	37304.6	53922.6	41750.7	50891.4	52838.7	50134.8	50257.8	35284.5	39637.4	38731.1	33901.9	48204.7	48492.6	49262	49624.6	50602.3	57389.4	50974.9	43663.3	50707.5	49230.7	64554.3	61788.2
Phenylpyruvate	neg	117735	148360	128625	227951	175151	154420	145837	131750	90329.4	93962	90175.9	88484.2	124244	116080	106823	100129	106723	99059	124158	116854	116866	110544	142265	124849
Phenylpyruvate	pos	2183.22	2073.12	3028.11	2662.32	3021.94	3429.26	3910.07	3650.32	2243.52	2546.25	2493.96	2217.75	3623.15	3784.98	3782.65	3904.04	3946.85	4771.71	3922.11	3470.61	3934.53	4114.2	4936.92	4939.78
Phosphoenolpyruvate	neg	39458	55254.2	47040.4	82600	61722.1	65115.1	57425	52173.4	41283.7	37021.2	36859.7	38525	44392.8	44307.6	37027.8	42621.7	37850.2	30662.1	39989.5	34884.1	38199.6	37582.4	69736.1	58789.9
Phosphoserine	neg	152.143	850.764	148.669	469.908	1436.62	1715.99	31.4118	90.8982	215.287	1265.44	841.537	883.338	121.99	75.6914	121.896	35.2263	32.3171	84.6373	34.4659	0	30.2651	227.589	399.476	140.895
Phosphoserine	pos	0	2.89429	0	1.48538	1.99065	2.06437	0	0	0	5.02572	4.30819	1.61133	0.10387	0	0	0	0	0	0	0	0	0	0	0
Proline	neg	517796	670676	576719	1.38249e+06	1.03072e+06	1.0456e+06	1.74437e+06	1.49246e+06	539051	597409	584710	591289	1.59739e+06	1.61548e+06	1.36387e+06	1.80407e+06	1.79934e+06	2.02329e+06	1.65462e+06	1.6214e+06	1.57887e+06	2.12006e+06	2.57077e+06	2.19923e+06
Proline	pos	35715.2	36414.5	50455.5	42332.2	55154.7	56179.4	58345	57324.9	33429.6	41271.9	40594.2	34199.6	61647.3	61481.7	60516	75243.2	78163.7	89208.4	58167.1	49165.6	57734.6	71649.6	98424.4	88020.4
PRPP	neg	634.249	2274.77	855.048	0	84.0762	72.8862	137.647	52.2898	770.637	33.5045	45.9505	58.0628	0	99.6356	80.9516	69.511	44.8186	151.794	83.8843	35.2655	32.4188	0	145.096	73.1096
Pyridoxine	neg	215024	337562	288945	851543	340098	348024	455608	401062	202796	198235	179590	204309	387810	359448	317426	310524	330431	329990	408328	371461	354684	334660	368642	345611
Pyridoxine	pos	19804	24834.4	37234.2	37516.5	25296.8	26911.4	35471.7	32110.9	18902.7	19285.4	17654.6	16421.7	34324.9	32973.1	31141.3	27020.6	28789.6	32898.1	37618.7	30340.1	33546.5	29443.2	45033.5	37963.7
Pyruvate	neg	640699	997163	794859	2.15728e+06	1.01499e+06	895293	906406	740175	455096	451064	453390	466196	672762	631381	541380	555411	619175	609175	725160	591173	590734	667931	1.22424e+06	748674
S-Adenosylhomocysteine	neg	60.8749	397.52	385.954	333.807	387.952	365.65	1052.63	1511.44	659.231	486.446	193.641	151.959	586.683	617.314	683.043	510.395	1209.43	1524.53	1068.85	940.069	833.203	2409.53	102.288	990.772
S-Adenosylhomocysteine	pos	1.20453	0	4.13939	0	1.51549	0	32.5639	24.8682	6.02689	1.48534	4.05077	1.02282	37.4245	31.5278	48.7708	6.33633	3.87682	3.81611	68.3515	41.6089	60.2459	11.3304	13.7479	9.34484
S-Adenosylmethionine	pos	310.543	315.951	457.682	297.891	462.224	445.206	474.064	451.651	297.624	476.674	408.596	355.449	490.536	498.952	521.485	392.943	288.08	395.518	453.235	432.544	494.794	420.344	439.502	439.554
Serine	neg	114867	188079	130436	367039	296354	321762	28685.6	24281.3	131490	213443	192698	214601	23813.4	24905.5	21314.4	28093.7	27922.2	28462.9	28288.5	29027.1	27629.3	34917.1	45891.2	39340.9
Serine	pos	2550.85	3267.26	3700.62	3548.24	4972.06	5582.59	428.671	391.395	2750.24	4871.85	4317.18	3998.52	419.525	346.241	385.09	448.397	468.887	451.102	365.171	356.237	396.235	402.148	610.995	531.157
Spermidine	pos	0.114056	0.752716	0.700842	0.184693	0.326276	1.63951	1.35679	1.81662	0	0.270317	0.0936648	0.363569	3.13048	0.358275	0.419711	0.307942	2.2751	1.7209	1.50633	1.63731	1.37515	0.741748	1.50256	0.395819
Succinate	neg	196324	258286	216646	424266	298353	267800	240160	226874	163107	173125	157332	164338	200754	181994	172361	171918	182993	170244	206007	188743	182560	193219	305912	218241
Taurine	neg	1.18575e+06	1.51966e+06	1.2794e+06	1.95765e+06	1.48826e+06	1.5969e+06	3.08043e+06	2.78958e+06	1.20661e+06	901963	807064	889196	2.52769e+06	2.44426e+06	2.07006e+06	1.9772e+06	1.97235e+06	2.15819e+06	2.72163e+06	2.75177e+06	2.60509e+06	2.53256e+06	2.73518e+06	2.30355e+06
Taurine	pos	20378.6	21271.2	29558.3	14882.7	19696.1	22166.8	30454.4	29979.5	19747.4	15919.5	14619.5	13184.3	34064	31401.6	31337.1	29383.2	29706.7	33675.4	31157.3	28263.7	31600.4	29432	39943.8	34169.1
Thiamine (+)	neg	42.7333	45.1352	62.0666	86.0225	52.5589	139.156	886.28	471.436	34.5467	40.8641	54.7339	125.068	826.759	347.641	369.417	569.153	916.4	833.096	543.114	588.532	286.372	496.866	769.629	298.127
Thiamine pyrophosphate (+)	neg	54.3288	0	0	0	0	112.24	417.31	265.06	111.824	185.427	91.3726	105.048	272.389	329.498	312.336	168.473	308.109	117.125	332.533	260.231	229.038	40.7353	103.484	147.375
Threonine	neg	1.76805e+06	2.16959e+06	1.88049e+06	4.0344e+06	3.09122e+06	3.03871e+06	2.98663e+06	2.5857e+06	1.57723e+06	1.70587e+06	1.68316e+06	1.76581e+06	2.58467e+06	2.70667e+06	2.29273e+06	3.0968e+06	3.04012e+06	3.35666e+06	2.75663e+06	2.8254e+06	2.72374e+06	3.66074e+06	4.35929e+06	3.96477e+06
Threonine	pos	52701.6	52418.2	74361.9	54263.6	70311.7	72384.4	51637.7	53930.2	46077.4	54560.4	52431.4	45126	52630.7	52029.9	52520.2	63684.3	64163.1	69784.6	49907.1	43778.1	50195.7	57615.7	79083.4	74607.9
Thymidine	neg	28321.2	43871.5	35600	88344.8	48678.6	50237.4	60914.6	52649.2	28669.1	29569.4	27015.8	30861	45713.6	42399	38769.6	37642	37961.8	41415	53165.3	50063.7	50536.5	52373.4	54275.4	52248.3
Thymidine	pos	1.28499	1.21288	1.59194	1.14232	1.28985	1.5045	0.966527	0.606636	1.30702	1.70598	1.53184	0.823283	0.565777	1.24404	0.49415	0.980632	0.833566	0.524927	0.692901	0.651001	1.14197	0.687791	0.751208	0.840349
Thymine	neg	7468.78	18004.4	16671.3	20675.2	24794.8	21121	18736.2	11312.5	9012.64	6253.54	27343.9	8829.64	7536.53	9788.75	6138.7	8305.78	6240.55	6188.33	6889.13	7872.76	7376.6	7777.49	10947.2	8626.01
Thymine	pos	61.9099	53.4249	83.7478	54.3779	66.0848	80.9184	181.164	182.805	57.9849	65.2817	57.6802	59.7843	190.204	182.04	205.691	184.884	180.258	209.856	202.709	196.344	195.888	197.517	339.643	245.526
Tryptophan	neg	122837	144591	128433	307315	222162	246988	73926.4	70403.5	93442.5	108829	114640	116515	268442	280048	249011	270750	271450	307197	101147	114877	111528	149323	152794	168613
Tryptophan	pos	4685.77	4339.03	6139.76	5723.04	6594.61	7750.4	2073.56	2230.19	3613.83	4668.95	4577.56	4201.51	8412.48	9108.1	8790.52	9752.9	9981.52	12229.3	3412.38	3275.06	3840.29	4960.86	5125.63	6061.08
TTP	neg	374.289	1434.54	1377.55	1712.24	1185.93	2445.2	181.975	99.4285	2224.45	1601.14	2060.12	2189.74	0	620.431	340.461	4938.96	7956.65	8663.74	309.484	530.145	293.288	5673.91	7380.52	8710.31
TTP	pos	0	1.24852	0	0	0	0	0	0	0	0	2.36457	0	0	0	0	0	0	0	0	0	0	3.23505	1.85836	0.725718
Tyrosine	neg	534076	623771	538988	1.25867e+06	931276	1.0255e+06	1.37857e+06	1.15922e+06	546309	583313	585722	610895	1.14947e+06	1.19828e+06	1.05695e+06	1.16359e+06	1.17785e+06	1.33187e+06	1.22995e+06	1.27296e+06	1.26003e+06	1.44584e+06	1.55706e+06	1.51633e+06
Tyrosine	pos	16144	15489.9	22303.4	19208.6	21965.4	24806.3	27761.2	26759.1	16521.2	18792.9	18295.5	16548.7	25952.1	27189.6	26906.7	28161.5	28308.6	33948.3	28217	24630.8	28944.3	29314.2	35725.8	35947.9
UDP	neg	301263	402635	366138	442528	325223	309837	520983	483582	238893	196562	187156	178816	473446	474883	389484	213699	209638	193997	378356	398302	383609	233624	264834	239584
UDP	pos	1270.85	1414.11	2137.57	980.255	1327.35	1437.98	1376.17	1381.86	1293.93	1141.88	1110.87	966.079	1486.08	1548.55	1490.54	1140.04	1179.79	1351.16	1402.8	1279.04	1488.83	1163.8	1710.35	1486.33
UDP-Glc	neg	259314	345111	289133	430177	327363	344112	333806	283073	251439	206009	210554	214580	315846	337014	280432	247981	259670	271860	313336	319128	313778	312334	352277	313968
UDP-Glc	pos	63.942	75.9723	119.707	57.3132	80.3095	80.0912	60.4233	62.3305	69.4007	63.693	62.0386	57.5882	67.2335	72.1406	64.7448	61.0089	61.487	70.475	61.6763	60.5263	69.9364	58.8401	91.3006	82.7875
UDP-GlcNAc	neg	577125	719745	631879	1.06104e+06	791603	791092	1.54957e+06	1.16861e+06	508329	479958	480260	444969	1.25788e+06	1.27468e+06	666512	1.13631e+06	1.17151e+06	1.26465e+06	1.32855e+06	1.3105e+06	1.25786e+06	1.27786e+06	1.40449e+06	1.22591e+06
UDP-GlcNAc	pos	2547.2	2693.72	4045.23	2236.88	2923.55	3073.44	5012.14	4672.84	2338.33	2400.07	2383.41	2037.92	4851.77	4658.86	4910.29	4792.75	4843.83	5877.69	4883.52	4169.16	4746.49	4629.05	7235.39	6277.72
UDP-Glucuronate	neg	36302.6	53488.4	39293.5	33772.1	27725.5	33905.6	89387.9	76614.9	38261.1	21132.4	22563.4	23434.4	86293.8	93364.2	69580.8	43234.7	43853.3	52235.2	66136.6	69057.3	70390	48737.8	56036.1	48657.2
UDP-Glucuronate	pos	8.01385	7.82723	12.6893	3.25602	5.7915	6.05893	14.1617	13.9066	8.47006	8.03178	2.8976	5.22921	13.8965	19.8632	16.4402	9.3422	9.22956	11.5141	14.8595	10.8123	12.5724	8.52344	11.82	11.533
UMP	neg	62440.7	73689.1	82400.5	110164	70829	66187	308226	271054	56132.3	42374.3	42541.8	40697.1	326000	301922	265576	29380.8	25297.8	22647.9	350199	363201	340817	29924.9	64668.3	32203
UMP	pos	60.2759	56.5949	132.022	38.2479	39.5773	52.7326	512.141	525.054	75.2359	42.1898	47.4877	36.52	674.331	559.744	617.655	20.4716	19.4855	16.4288	755.637	654.89	715.481	17.7259	64.8074	28.9619
Uracil	neg	98956.3	131788	121655	201918	170665	166772	121115	120244	98740.5	119682	135615	100487	106890	99616.9	96879.2	101310	98832	78737.6	85199.7	86958.7	91334.6	71482.6	86428.2	78384.4
Uracil	pos	2.34218	4.23111	4.5281	2.54174	3.03041	2.03533	0.524424	0.908208	2.43059	1.74552	2.37211	2.07675	0	2.03851	1.51673	1.06497	1.44662	2.12762	0.454419	0.656264	0.958123	1.03099	0.475622	1.49818
Uric acid	neg	642.852	774.917	875.028	1307.71	1454.33	1410.18	1775.3	953.464	533.119	387.414	2068.07	684.275	2363.1	3022.7	1510.16	2190.18	4451.07	3670.29	3102.56	2490.88	2609.18	4472.12	2067.38	4389.87
Uridine	neg	71242.7	100183	93115.8	214407	106116	109155	296291	237212	67408.9	57896.1	52223.3	63816.2	269706	258973	216762	140545	149802	177488	312309	285682	275648	208465	227981	229852
Uridine	pos	0	6.05345	9.0392	0	3.40779	6.65731	4.12744	3.48364	1.7158	1.30136	3.83549	0.915446	11.2236	8.43623	4.34046	8.0527	2.28199	6.54397	4.04938	4.48238	9.27855	3.28782	7.21308	6.5187
UTP	neg	344553	498377	380581	423055	343768	349154	218832	195494	285731	196235	195553	202387	183691	204773	150408	294486	293908	294532	128985	145129	137022	330877	367417	335281
UTP	pos	1244.39	1434.59	1836.04	653.265	913.031	981.922	482.825	529.024	1109.3	734.568	691.906	629.083	498.841	527.932	470.355	754.867	775.776	864.39	334.709	328.616	341.993	722.28	966.999	861.567
Valine	pos	67602.9	68141	97650.1	64702.9	83299.8	83218.9	67356.9	69297.8	59325	65286.5	63592.8	54079.2	65396.7	63776.3	64354.4	67028.7	68155.7	74921.4	63514.9	54733.3	62832.6	63282.6	83197.7	79195.4
Xanthine	neg	79281	134788	116933	411485	145829	153384	252239	182209	73857.3	72550.5	71320.5	86634.7	201652	189228	143243	136012	145226	167230	248491	213498	200331	233086	288138	255503
Xanthine	pos	9.17706	11.7262	39.3579	58.9939	13.6751	21.4065	83.8082	56.6456	14.8735	14.6009	16.1916	14.9469	77.5794	78.5423	72.7076	39.1125	54.4626	82.5961	129.873	118.897	121.582	115.937	138.579	103.792
Xanthosine	neg	6501.46	10899.9	9921.3	20917	7633.45	7455.91	27555	22518.5	8442.39	3496.86	6143.44	4841.71	21697.3	21500.5	17116	8584.61	8897.26	10510.7	21760.6	21617	19965.8	10774.3	13214.5	12215
Xanthosine	pos	30.188	40.5654	57.3049	71.3727	48.0742	61.1318	88.2298	69.9636	37.1058	29.5625	33.9487	33.8897	87.5202	76.847	73.9546	57.7893	52.3051	64.6798	76.4203	64.7857	68.1331	50.1861	7.22862	35.7447

## Sheet: remove double
SampleID		Control_1	Control_2	Control_3	Infected_1	Infected_2	Infected_3	IFN_1	IFN_2	IFN_3	IFN+infected_1	IFN+infected_2	IFN+infected_3	Myc_1	Myc_2	Myc_3	Myc+infected_1	Myc+infected_2	Myc+infected_3	MYC+IFN_1	MYC+IFN_2	MYC+IFN_3	MYC+IFN+infected_1	MYC+IFN+infected_2	MYC+IFN+infected_3
Group	Ionization mode	Control	Control	Control	Infected	Infected	Infected	IFN	IFN	IFN	IFN+infected	IFN+infected	IFN+infected	Myc	Myc	Myc	MYC+infected	MYC+infected	MYC+infected	MYC+IFN	MYC+IFN	MYC+IFN	MYC+IFN+infected	MYC+IFN+infected	MYC+IFN+infected
(Iso)Leucine	neg	3.15306e+06	3.9897e+06	3.47522e+06	7.71366e+06	5.61432e+06	5.64821e+06	6.31377e+06	5.70584e+06	3.01329e+06	3.19633e+06	3.23511e+06	3.26933e+06	5.27314e+06	5.36366e+06	4.70862e+06	5.02234e+06	5.04968e+06	5.23509e+06	5.81126e+06	5.69128e+06	5.62969e+06	5.86033e+06	6.84459e+06	6.47232e+06
3-Phosphoglycerate	neg	90597.8	114420	92216.6	166267	128866	140578	104755	93185.9	84153.6	74916.1	72805.7	89462	128413	122198	105307	135114	140691	128403	117769	107157	113219	133565	158882	138624
3-Phosphohydroxypyruvate	neg	326.701	732.115	751.495	800.383	490.489	1074.58	1037.82	1988.9	1619.81	1499.63	1188.96	1308.22	1633.53	1992.38	2817.2	1658.41	1200.43	1005.38	1790.24	2694.17	2573.55	1207.14	973.737	1021.12
a-Ketoglutarate	neg	18344.9	25533.7	17409.2	41462.8	26368.6	29735.2	14229.8	11260.9	13858.5	19195.5	15122.5	17276.5	13922.6	15964.5	12475.7	28968.5	26610.3	30437.4	16543.8	13721.7	14941.9	39495.4	60636.2	30335.7
Acetoacetate	neg	395367	638552	544512	1.55215e+06	711631	708444	662736	561685	365208	430391	402368	438708	562524	535354	479486	488440	514374	519204	648511	589710	590531	634491	831690	673694
Aconitate	neg	84578.4	140821	95156.5	285933	197808	226777	39655.9	23321.5	78963.7	141405	116664	120761	55542	50613.6	37943.3	355210	319839	350024	50604.5	41105.6	37612.7	386198	467428	378719
Adenine	neg	174159	206552	164630	281302	216694	194359	188461	155374	91365.5	95885.9	103387	99617.9	151325	142862	124974	117965	147146	137232	167246	153543	147792	155967	199343	179385
Adenosine	neg	2819.06	4192.14	3932.42	7047.35	4833.59	4580.67	52845.1	47465.1	5813.8	3617.87	4029.28	4253.05	39073.2	41755.4	37755.2	13646.8	14861	17649.2	49892.9	47281.8	47701.4	22363.6	20559.2	20420.5
ADP	neg	324046	392613	353174	660453	508754	474588	599436	537170	236874	273217	275123	258853	524409	517534	452759	319956	310665	309675	495495	503223	480007	364493	412697	380950
Alanine	neg	354003	479210	399100	905610	712178	736681	554208	508878	365676	441899	421909	440032	551750	584868	480970	730814	744470	800691	586144	609263	585859	837646	1.00941e+06	931696
AMP	neg	53428	62368.6	62550.3	99276.5	64775.3	51426.5	362295	307742	38585.2	32837.8	30592.6	25577.5	345149	321519	292990	21166.1	16798.8	16162.3	452318	431700	405140	21721.5	25105.7	24081.8
Arginine	neg	54719.8	75486.2	70547.9	945.736	0	170.368	171611	145542	53095.2	329.972	248.715	16.9194	141250	140751	125444	619.44	117.111	198.716	161114	153317	154736	1644.29	3664.24	421.403
Asparagine	neg	4050.33	6722.28	5806.76	44379.4	38385.5	39603.3	12308.5	11758.8	8171.54	24036.1	20348.9	22925	10751.3	11032.6	10542.6	34713.8	33038.9	35972.6	13549.9	11787.2	11902.9	36982	45420.4	40462
Aspartate	neg	202964	305668	203760	726450	663928	693124	114868	106502	173699	469578	397590	450756	114048	113893	106732	358000	309103	346286	112123	108895	114089	367412	470147	394918
ATP	neg	445811	619901	482182	1.03396e+06	882196	879191	458808	395670	395730	497565	501865	509267	383371	411897	320534	843889	824584	864183	324869	339251	320103	941806	1.08116e+06	988052
Biotin	pos	6.85769	4.39487	1.76082	6.36391	2.21745	4.50972	39.9071	42.9603	4.74978	3.07541	3.4208	3.48656	43.6629	49.3138	40.9687	3.02066	0.914979	3.39378	68.8488	49.1685	58.1826	5.23933	2.94238	6.6775
cAMP	pos	1.6865	2.53895	4.99183	1.43566	3.58919	4.80321	21.8096	19.7589	6.63867	4.38121	1.4211	3.94237	19.8692	14.2456	15.4069	6.482	8.63755	9.46512	23.1927	18.0796	19.6728	11.2281	7.77934	8.18982
Carbamoylaspartate	neg	8677.23	13618	9212.07	17691.8	11866.6	15957.4	8335.11	8410.77	6640.49	7245.32	6204.89	6600.07	10056.4	10001.5	8021.06	14841.2	14868.7	14660.2	7127.97	8317.93	8504.24	9056.63	13403.3	8991.87
Carnitine	pos	6004.92	7498.99	8735.13	11379	14818.7	19113.6	8815.78	8477.41	7620.19	13997.4	11066.5	11395.2	7124.79	6902.15	6806.88	18067.5	16867.7	20387.4	6274.65	5570	5727.72	15036.3	23064.8	17819.3
CDP	neg	49096.2	66404.4	61397.4	85439.7	63823.8	62026.8	79577	73777.8	42954.9	35753.2	36840.6	36129.2	74808.1	75890	60100.7	50295.5	49612.2	50854.9	58232.9	59756.9	57107.1	57748.1	68683	62361.2
Choline	pos	2175.5	2617.18	3863.1	4863.18	3034.6	3450.85	14488.9	11667.3	3316.3	3867.44	3392.29	3550.88	12247.2	10378.4	13104.3	2558.31	2693.61	3719.53	25593.8	21533.5	25009.4	4883.51	8237.09	7276.42
Citrate	neg	3.76518e+06	6.05837e+06	4.30252e+06	1.23182e+07	8.18027e+06	9.32957e+06	3.31275e+06	2.27904e+06	3.58298e+06	5.369e+06	4.76993e+06	5.22964e+06	4.24591e+06	3.96141e+06	2.98372e+06	1.58208e+07	1.52366e+07	1.69565e+07	4.48649e+06	3.42061e+06	3.07604e+06	1.84406e+07	1.93248e+07	1.86e+07
Citrulline	neg	3194.95	3985.2	3261.02	38068.5	27020	27066.5	7818.94	7384.32	3228.92	15886.1	14746	16740.2	5830.67	6781.77	6510.94	29094.6	28406.2	30707.1	7127.51	7518.96	6829.94	37791	36745.9	40056.9
CMP	neg	1128.4	1675.97	2696.94	3317.08	1635.12	2022.66	30189.1	26801.1	2411.53	1838.26	1382.04	1434.13	30516	27885.3	25956.4	2271.86	2032.11	1992.55	34685.6	35783.1	32396.5	2913.02	4247.46	3688.68
CTP	neg	75890.3	105168	87038	118637	95439.7	91936.6	62645	56634.5	66867.7	55260	54581.9	54803.8	55670.1	61308	43827	88560.5	86813	91275.8	36392.8	39036.6	36960.5	105186	122448	107906
Cystathionine	neg	86838	120559	103376	283483	241677	243523	101647	88533.1	107427	160962	163030	165963	98303.2	100164	86448.6	175294	167548	177068	114376	115153	115983	224689	254695	240748
Cysteine	neg	127.627	150.371	74.2994	67.73	422.278	330.201	837.163	544.469	286.315	374.792	437.398	528.02	1177.32	1551.91	1506.75	1768.29	1759.53	2398.87	2611.93	5280.24	4099.07	4655.29	1910.74	2825.97
Cytidine	neg	1.19674e+06	1.56118e+06	1.28236e+06	2.17476e+06	1.73316e+06	1.69688e+06	1.95819e+06	1.66091e+06	973143	890230	885588	893681	1.7147e+06	1.74169e+06	1.52638e+06	1.47381e+06	1.46468e+06	1.55033e+06	1.66929e+06	1.69304e+06	1.67695e+06	1.7215e+06	1.93299e+06	1.79583e+06
Cytosine	pos	172048	176035	195499	205490	200928	218419	167060	164235	163431	188052	176190	160806	177579	173377	180596	151981	162215	178572	186008	155184	176893	150560	181831	168818
dAMP	neg	143.187	312.939	273.291	877.752	374.424	527.38	1165.11	1169.31	309.312	328.486	167.262	167.796	1026.74	1013.69	1127.79	453.622	149.909	268.584	1218.16	1415.27	1221.73	221.929	36.7732	327.968
dCMP	neg	11249.6	15949.3	10898	22604.5	17768.3	18907.6	17912.3	16024.6	13142.6	13445.3	13076.8	12670.5	13596.9	15845.3	14945.8	19200.6	17300.7	19661.3	18109.7	15230.1	15597.4	22816.5	783.179	17790.6
Deoxyadenosine	pos	201.081	174.207	196.607	420.852	153.339	170.223	177.35	191.399	98.8501	212.535	182.426	119.402	150.742	136.533	147.505	120.947	117.859	126.017	134.255	126.139	142.65	87.5993	148.484	149.729
Deoxyguanosine	neg	2819.06	4248.19	4082.96	7396.33	4906.06	4580.67	52911.7	47465.1	5821.43	3742.81	4075.99	4298.56	39113.6	41755.4	37755.2	13673	14861	17649.2	49893.1	47302.4	47783.1	22363.6	20559.2	20432.8
Deoxyinosine	neg	209.799	357.103	332.662	1880.65	712.383	1425.65	3271.24	2916.04	602.589	640.28	727.269	950.483	3678.93	1574.17	2624.79	884.94	1344.72	1393.55	2355.1	2387.27	2122.88	1527.76	2315.01	3187.25
Deoxyribose-phosphate	neg	16997.1	22724.5	20815.3	50942	27959.1	22528.7	22209.9	18128	14287.5	14289.9	9772.46	13517.2	15839.3	13635.3	12217.5	12261.1	14393.8	11625.4	14256.8	13442	11891	11313.5	14900	13424.6
Deoxyuridine	neg	3594.73	6314.12	6103.86	10677.2	7533.56	9663.26	11508.8	10093.3	5814.73	5804.11	5993.27	5675.84	7667.59	6854.06	8184.95	7336.1	7353.57	8376.33	8666.21	8784.87	7484.58	9885.34	8875.23	7993.32
dGMP	neg	53428	62368.6	62550.3	99276.5	64775.3	51426.5	362295	307742	38585.2	32837.8	30596.1	25577.5	345149	321519	292990	21166.1	16798.8	16162.3	452318	431700	405194	21721.5	25105.7	24081.8
dGTP	neg	445811	619901	482182	1.03396e+06	882196	879191	458808	395670	395730	497565	501865	509267	383371	411897	320534	843889	824584	864183	324869	339251	320103	941806	1.08116e+06	988052
Dihydroorotate	neg	9168.87	11844.4	11156.7	13526.3	13202.6	12909.3	5491.65	3964.01	12964.2	6682.69	12658.1	6863.4	3586.73	3098.65	2320.47	23417.5	29905	30522.3	3158.36	2032.08	2561.47	39520.1	37385.5	26348
Dihydroxyacetone phosphate	neg	370886	490258	444157	665185	550188	476733	906513	803319	329152	278645	268748	264557	736147	734222	614220	549800	563956	533567	658235	695648	668025	553844	600662	547434
dTDP	neg	584.772	425.887	1268.85	4646.54	1929.84	2456.67	3464.61	1473.56	950.718	1226.29	1342.44	1403.36	3869.56	3538.4	2344.97	3381.54	3666.97	3556.01	2368.16	2541.87	2173.18	3906.34	4266.59	4340.18
dTMP	neg	52.3226	185.426	521.644	1617.4	1217.38	893.061	6478.44	5863.07	1161.15	1224.03	978.462	1097.57	6526.54	8481.66	7873.79	604.206	1753.26	1275.53	19471.1	21771	20882.3	2378.24	3085.51	2088.3
Erythrose-4-phosphate	neg	25024.5	32561.4	35942.2	48315.1	43786.3	38334.6	104255	85754.1	32205.2	29028	26461.9	25125.3	69946.7	77610.6	65257.4	34056.8	43996.4	34134.3	73178.4	73332.9	78621.6	51844.6	45530.7	42350.7
FAD	neg	428.845	477.652	318.127	708.791	153.87	353.83	595.605	408.691	193.6	319.587	108.353	190.414	1100.36	863.288	660.787	153.927	568.456	949.165	70.128	774.79	438.856	997.089	1636.4	628.719
Fructose-1,6-bisphosphate	neg	416830	602832	631850	1.01132e+06	807394	751727	4.77832e+06	4.4818e+06	797360	550168	522376	474712	4.27095e+06	4.37287e+06	4.06664e+06	833474	764500	650476	4.72485e+06	4.96006e+06	4.81745e+06	804595	748568	703144
Fumarate	neg	33398.9	40022.3	32061.7	65521.6	51121.9	52814.4	19204.1	17969.2	18743.3	29638.7	27236.6	28442.5	18357.9	16574.9	17199.4	33580.3	31625.1	35681.8	19176.2	17499.7	15397.8	51349.5	108701	49280.1
GDP	neg	84251.6	105161	103378	151469	114559	107683	262901	231851	76698.5	67863.2	65127.4	61573.4	199464	206045	172390	104270	106605	104895	179436	190375	177355	127178	136809	128358
Gluconate	neg	273063	352977	301063	445910	314505	325124	1.16735e+06	991921	318245	205241	181689	199565	909003	912455	784160	526028	505739	585453	917557	963878	932743	686607	674353	618294
Glucosamine	pos	1539.52	1661.74	2246.15	2455.89	1343.56	1376.58	901.38	816.519	766.314	784.094	1293.19	938.371	776.801	606.697	565.278	576.556	579.688	694.032	646.762	472.792	479.416	547.246	950.036	1148.42
Glucosamine-phosphate	neg	5312.53	7398.42	5143.5	9200.97	7970.59	7825.88	27054.1	26053.8	7490.65	6815.91	9719.28	8755.29	21541.8	19997.2	18112.7	7794.33	7554.71	9739.36	19159.3	19470.9	18201.9	11743.9	16150.2	18448
Glutamate	neg	1.35537e+06	1.94851e+06	1.41889e+06	3.44998e+06	2.85423e+06	3.05561e+06	1.39374e+06	1.19844e+06	1.26579e+06	2.0281e+06	1.74701e+06	1.97308e+06	1.44825e+06	1.44005e+06	1.22249e+06	2.65927e+06	2.5094e+06	2.78339e+06	1.34845e+06	1.35306e+06	1.33057e+06	2.73999e+06	3.59829e+06	2.95363e+06
Glutamine	pos	1469.07	1372.36	1347.03	1904.68	1692.22	1923.69	845.041	1024.44	912.158	2299.38	1502.69	1514.23	906.443	902.028	991.2	950.557	940.991	1176.08	989.059	840.066	982.021	901.253	1943.95	1448.45
Glycerol-3-phosphate	neg	23927.3	25219.7	26398.9	40929.1	31429	32354.7	110150	93462.4	25104.1	18854.2	19388.5	22255.2	103242	101175	93342.9	49106.5	48491.3	54860.7	127013	121434	116266	70494.6	81995.3	81933.7
Glycine	neg	388070	509177	442577	878550	664136	665093	980209	863194	418885	394064	387508	397101	780982	797485	692530	788670	790221	857419	876692	856574	863152	978723	1.14967e+06	1.06132e+06
GMP	neg	10725	10615	10491.3	13362.5	10948.8	10032.8	75555.9	67550.5	8838.78	4465.92	5666.86	4290.44	52068	51457.3	48023.1	10663.9	9489.55	8178.52	66644.9	65427.4	64147.6	8309.77	8252.51	7600.55
GSH	neg	996241	1.369e+06	973579	1.86597e+06	1.64037e+06	1.69344e+06	1.30024e+06	1.3084e+06	1.0197e+06	967873	986046	941136	1.06634e+06	1.24937e+06	1.03102e+06	1.60324e+06	1.50479e+06	1.64989e+06	1.17824e+06	973661	1.09971e+06	1.71536e+06	169686	1.46601e+06
GSSG	pos	2199.92	2616.85	3479.92	2012.88	2784.2	2723.53	1592.14	1402	1704.28	2305.73	1882.09	1901.69	1915.82	1635.35	1579.63	1928.87	2045.76	2099.97	1398.67	1601.45	1452.35	1628.42	5720.14	2655.89
GTP	pos	2167.95	2281.7	3290.35	1890.28	2541.85	2706.26	2308.37	2349.87	2013.65	2068.53	1963.53	1723.28	1991.52	2073.19	1883.82	2746.05	3001.1	3164.9	1537.53	1397.09	1485.06	2739.73	3399.87	3278.92
Guanine	pos	323.958	324.262	582.024	401.53	471.415	484.364	4832.69	4730.72	519.132	436.551	481.227	372.824	4103.78	3678.23	4176.95	348.516	366.156	399.104	5588.97	4604.9	4985.91	426.13	505.699	628.779
Guanosine	neg	5785.37	9872.43	12613.3	21925.8	15845.7	12975.5	231876	210599	18723.4	10782.5	18047	10962.7	166992	149685	153016	6840.4	7155.04	6822.85	226907	211577	205186	9020.43	6567.91	7563.81
Hexosephosphate	neg	213946	261162	219223	432863	370437	351137	809887	751748	264646	253218	238848	247351	578951	604255	571155	273910	264677	279403	656759	701729	662899	332267	387685	356205
Histidine	neg	811278	1.06329e+06	958611	2.26832e+06	1.61306e+06	1.68622e+06	2.30888e+06	1.96616e+06	937994	908440	910201	957388	1.946e+06	2.00791e+06	1.77703e+06	1.79028e+06	1.79728e+06	1.93971e+06	2.23023e+06	2.20504e+06	2.19563e+06	2.30568e+06	2.58202e+06	2.42521e+06
Homocysteine	pos	0	0	0.761247	0.513817	0	0.00200234	0.130009	0.366303	0	0.736884	0.454992	0	0	2.07866	3.7127	3.5395	5.11252	4.51577	3.02765	1.61181	7.91953	8.54863	6.45839	6.63784
Homoserine	neg	1.78117e+06	2.18968e+06	1.89766e+06	4.07315e+06	3.12806e+06	3.075e+06	3.02205e+06	2.62326e+06	1.6019e+06	1.73217e+06	1.70761e+06	1.79037e+06	2.61773e+06	2.74309e+06	2.32708e+06	3.13999e+06	3.08117e+06	3.40494e+06	2.80265e+06	2.86988e+06	2.77401e+06	3.72091e+06	4.42316e+06	4.02392e+06
Hydroxybutyrate	neg	31668.7	44946	43499.8	109082	54007.3	59248.4	78874.8	61854.8	32871.3	40082.3	32787	37492.4	66058.3	63735.1	50421.3	62094	66305.7	67435.5	73334.4	65960.8	61284	76311.1	116753	85152.5
Hypoxanthine	pos	360.346	515.264	933.355	964.871	552.487	751.298	1072.15	888.068	450.173	973.53	966.149	1376.06	1303.16	1104.41	1410.13	474.874	435.396	588.134	2349.52	1794.35	2343.79	552.298	1136.49	811.642
IMP	neg	245.577	559.896	208.438	3218.67	1127.77	1239.65	100.337	182.276	365.258	2369.09	2341.71	3918.72	108.69	140.41	118.634	185.613	351.341	602.231	723.676	655.723	1309.47	116.12	1156	735.856
Inosine	neg	72630.5	135318	109425	432287	117939	129140	195054	144261	76981.9	100792	101002	139970	173655	147546	151425	100759	117564	133361	258926	223194	228349	170980	235849	173763
Lactate	neg	4.45246e+06	6.33848e+06	6.06875e+06	1.60237e+07	7.50339e+06	7.4051e+06	1.35814e+07	9.84629e+06	4.65548e+06	4.62686e+06	4.17802e+06	4.91588e+06	1.17889e+07	1.17759e+07	8.65071e+06	8.51308e+06	9.10505e+06	1.04469e+07	1.5342e+07	1.3611e+07	1.24842e+07	1.60828e+07	1.91076e+07	1.62567e+07
Lysine	neg	133643	185606	174020	547568	283573	273120	507546	397924	133100	154553	156188	163302	417486	423784	366745	333880	354844	387529	488883	468209	456648	454257	533825	484048
Malate_neg	neg	445714	531482	351792	886943	646426	644791	243523	192343	219498	327876	296947	308285	195246	178924	155158	335759	317510	344515	196235	162197	154457	367830	632427	397370
Malate_pos	pos	68.5357	67.636	94.9788	75.8495	93.5868	95.5755	220.209	202.364	65.2281	77.0528	65.5518	67.4455	172.553	169.944	193.3	99.5784	99.5032	103.396	230.273	177.661	222.045	115.554	103.439	115.457
Methionine	neg	290417	350568	298743	663817	487079	508640	643018	584274	284144	276263	280222	286681	532966	563267	496616	523655	524270	551879	600889	602690	599454	625965	664164	673848
Mevalonate	neg	26551.1	46708.5	38038.3	110208	43583.8	35107.9	50142.9	36559.7	23210.9	22871.2	19746.5	23790	42371.4	39068.7	33177.4	35532	57414	37518.1	64030.7	52813.7	48604	34598.7	71930.9	45959.8
myo-Inositol	neg	6.24741e+06	9.92774e+06	8.55048e+06	2.40685e+07	1.12331e+07	1.12781e+07	1.10451e+07	9.26957e+06	5.93005e+06	6.53272e+06	6.13024e+06	6.82436e+06	9.11909e+06	8.7104e+06	7.6471e+06	7.65662e+06	8.04493e+06	8.30627e+06	1.04702e+07	9.65757e+06	9.56082e+06	1.01604e+07	1.10043e+07	1.03479e+07
N-Acetylneuraminic acid	neg	17247.4	22654.2	20614.6	48045.4	27374.7	27504.2	29897.2	26078.2	14479.6	18390	16677.2	16633.3	25461.2	23532.8	21202.9	25019	24382.1	28910.1	27631.1	26534.2	28376	32927.4	32273.2	34457.2
N-Acetylornithine	neg	1659.85	2524.81	2000.88	5355.75	3177.22	3756.28	5713.3	5432.66	1871.16	2371.98	2261.62	2146.44	3885.54	4766.24	3955.33	4263.54	3910.05	4705.22	4463.27	5497.38	5289.69	6065.85	6441.65	5831.48
NAD+	pos	1635.29	1764.75	2374.09	1626.25	2316.63	2303.09	1885.51	1896.95	1333.67	1620.39	1481.22	1389.64	2332.93	2359.63	2312.79	2094.32	2235.45	2566.17	1992.21	1798.67	1969.29	1819.04	3018.62	2471.28
NADH	pos	34.0187	32.242	54.1351	19.7156	22.8675	34.7634	248.738	233.634	36.6625	23.4331	28.3563	24.2903	235.274	264.627	227.434	74.0874	88.4886	92.5563	215.597	175.145	215.117	84.2545	93.2378	115.077
NADP+	pos	17.1161	21.4414	38.9338	22.503	29.9638	32.0607	25.7423	14.6467	25.6523	18.727	16.7519	16.8838	10.0445	30.6761	22.5765	27.3576	45.6671	60.6368	19.5501	23.148	23.6108	53.5722	66.5752	51.6915
NADPH	pos	5.89434	3.24928	0	3.53398	2.87192	4.57655	1.00915	2.41328	8.70834	8.34486	7.20593	5.81426	0	1.29958	0	3.99722	1.56641	0	1.32532	0	0	1.50462	12.8941	8.40844
Nicotinamide	pos	9315.65	10987.3	15362.9	13627.3	11799.1	11993.6	10408	9495.18	7190.81	7790.2	7889.26	7357.25	12899.1	12077.8	11696.7	10270.1	10797.6	13435.3	12385.1	10116.5	11880.4	11097	13765	11754.9
Nicotinate	pos	9.12143	8.10492	22.6873	11.2686	13.3623	12.8209	7.12798	8.36659	6.5158	15.8699	11.1189	8.49524	5.06991	5.65884	10.6262	13.7712	15.1969	17.6283	6.51516	5.35291	5.5031	15.1253	12.5106	7.7244
Ornithine	pos	1042.94	1041.61	1612.08	4397.02	4810.18	4650.87	1397.54	1484.84	947.069	3418.5	3458.1	2956.81	1516.33	1439.56	1498.32	3484.8	3237.48	3847.5	1572.29	1271.14	1472.63	3386.27	4098.19	4459.43
Orotate	neg	0	124.366	1064.5	427.52	450.639	319.834	424.799	192.118	358.184	159.446	2144.97	410.397	65.6221	485.178	431.655	56.6445	76.8073	531.443	84.1803	527.271	644.362	131.993	2300.18	65.1912
Oxaloacetate	neg	1282.93	1023.78	313.077	4633.48	2517.36	2393.92	250.159	288.381	917.403	3280.2	2979.49	2616.75	341.693	112.598	777.351	1636.95	2334.07	1482.91	609.923	850.858	1235.86	1872.09	1639.98	2287.34
Pantothenate	neg	212345	275090	233018	593864	408220	451587	240654	207888	204957	293780	255721	302241	223811	228211	189827	264444	270228	281413	248769	234167	232125	324860	293333	299762
Pentose-5-phosphate	neg	50486	74366.6	65437.4	89418.9	73931.8	56640.4	102202	97300.2	47078.7	42507.8	37319.1	38522.7	80970.5	80355.6	78693	33869.1	33211.6	30859.4	84312.3	95721.4	94886.5	36879.6	34097.9	32798.1
Phenylalanine	neg	1.19878e+06	1.45397e+06	1.27782e+06	2.83073e+06	2.06833e+06	2.09312e+06	2.5751e+06	2.25221e+06	1.1305e+06	1.1706e+06	1.1966e+06	1.20241e+06	2.16369e+06	2.1977e+06	1.93595e+06	2.07771e+06	2.11765e+06	2.25051e+06	2.31204e+06	2.32366e+06	2.29442e+06	2.4492e+06	2.77343e+06	2.6968e+06
Phenylpyruvate	neg	117735	148360	128625	227951	175151	154420	145837	131750	90329.4	93962	90175.9	88484.2	124244	116080	106823	100129	106723	99059	124158	116854	116866	110544	142265	124849
Phosphoenolpyruvate	neg	39458	55254.2	47040.4	82600	61722.1	65115.1	57425	52173.4	41283.7	37021.2	36859.7	38525	44392.8	44307.6	37027.8	42621.7	37850.2	30662.1	39989.5	34884.1	38199.6	37582.4	69736.1	58789.9
Phosphoserine	neg	152.143	850.764	148.669	469.908	1436.62	1715.99	31.4118	90.8982	215.287	1265.44	841.537	883.338	121.99	75.6914	121.896	35.2263	32.3171	84.6373	34.4659	0	30.2651	227.589	399.476	140.895
Proline	neg	517796	670676	576719	1.38249e+06	1.03072e+06	1.0456e+06	1.74437e+06	1.49246e+06	539051	597409	584710	591289	1.59739e+06	1.61548e+06	1.36387e+06	1.80407e+06	1.79934e+06	2.02329e+06	1.65462e+06	1.6214e+06	1.57887e+06	2.12006e+06	2.57077e+06	2.19923e+06
PRPP	neg	634.249	2274.77	855.048	0	84.0762	72.8862	137.647	52.2898	770.637	33.5045	45.9505	58.0628	0	99.6356	80.9516	69.511	44.8186	151.794	83.8843	35.2655	32.4188	0	145.096	73.1096
Pyridoxine	neg	215024	337562	288945	851543	340098	348024	455608	401062	202796	198235	179590	204309	387810	359448	317426	310524	330431	329990	408328	371461	354684	334660	368642	345611
Pyruvate	neg	640699	997163	794859	2.15728e+06	1.01499e+06	895293	906406	740175	455096	451064	453390	466196	672762	631381	541380	555411	619175	609175	725160	591173	590734	667931	1.22424e+06	748674
S-Adenosylhomocysteine_neg	neg	60.8749	397.52	385.954	333.807	387.952	365.65	1052.63	1511.44	659.231	486.446	193.641	151.959	586.683	617.314	683.043	510.395	1209.43	1524.53	1068.85	940.069	833.203	2409.53	102.288	990.772
S-Adenosylhomocysteine_pos	pos	1.20453	0	4.13939	0	1.51549	0	32.5639	24.8682	6.02689	1.48534	4.05077	1.02282	37.4245	31.5278	48.7708	6.33633	3.87682	3.81611	68.3515	41.6089	60.2459	11.3304	13.7479	9.34484
S-Adenosylmethionine	pos	310.543	315.951	457.682	297.891	462.224	445.206	474.064	451.651	297.624	476.674	408.596	355.449	490.536	498.952	521.485	392.943	288.08	395.518	453.235	432.544	494.794	420.344	439.502	439.554
Serine	neg	114867	188079	130436	367039	296354	321762	28685.6	24281.3	131490	213443	192698	214601	23813.4	24905.5	21314.4	28093.7	27922.2	28462.9	28288.5	29027.1	27629.3	34917.1	45891.2	39340.9
Spermidine	pos	0.114056	0.752716	0.700842	0.184693	0.326276	1.63951	1.35679	1.81662	0	0.270317	0.0936648	0.363569	3.13048	0.358275	0.419711	0.307942	2.2751	1.7209	1.50633	1.63731	1.37515	0.741748	1.50256	0.395819
Succinate	neg	196324	258286	216646	424266	298353	267800	240160	226874	163107	173125	157332	164338	200754	181994	172361	171918	182993	170244	206007	188743	182560	193219	305912	218241
Taurine	neg	1.18575e+06	1.51966e+06	1.2794e+06	1.95765e+06	1.48826e+06	1.5969e+06	3.08043e+06	2.78958e+06	1.20661e+06	901963	807064	889196	2.52769e+06	2.44426e+06	2.07006e+06	1.9772e+06	1.97235e+06	2.15819e+06	2.72163e+06	2.75177e+06	2.60509e+06	2.53256e+06	2.73518e+06	2.30355e+06
Thiamine (+)	neg	42.7333	45.1352	62.0666	86.0225	52.5589	139.156	886.28	471.436	34.5467	40.8641	54.7339	125.068	826.759	347.641	369.417	569.153	916.4	833.096	543.114	588.532	286.372	496.866	769.629	298.127
Thiamine pyrophosphate (+)	neg	54.3288	0	0	0	0	112.24	417.31	265.06	111.824	185.427	91.3726	105.048	272.389	329.498	312.336	168.473	308.109	117.125	332.533	260.231	229.038	40.7353	103.484	147.375
Threonine	neg	1.76805e+06	2.16959e+06	1.88049e+06	4.0344e+06	3.09122e+06	3.03871e+06	2.98663e+06	2.5857e+06	1.57723e+06	1.70587e+06	1.68316e+06	1.76581e+06	2.58467e+06	2.70667e+06	2.29273e+06	3.0968e+06	3.04012e+06	3.35666e+06	2.75663e+06	2.8254e+06	2.72374e+06	3.66074e+06	4.35929e+06	3.96477e+06
Thymidine	neg	28321.2	43871.5	35600	88344.8	48678.6	50237.4	60914.6	52649.2	28669.1	29569.4	27015.8	30861	45713.6	42399	38769.6	37642	37961.8	41415	53165.3	50063.7	50536.5	52373.4	54275.4	52248.3
Thymine	pos	61.9099	53.4249	83.7478	54.3779	66.0848	80.9184	181.164	182.805	57.9849	65.2817	57.6802	59.7843	190.204	182.04	205.691	184.884	180.258	209.856	202.709	196.344	195.888	197.517	339.643	245.526
Tryptophan	neg	122837	144591	128433	307315	222162	246988	73926.4	70403.5	93442.5	108829	114640	116515	268442	280048	249011	270750	271450	307197	101147	114877	111528	149323	152794	168613
TTP	neg	374.289	1434.54	1377.55	1712.24	1185.93	2445.2	181.975	99.4285	2224.45	1601.14	2060.12	2189.74	0	620.431	340.461	4938.96	7956.65	8663.74	309.484	530.145	293.288	5673.91	7380.52	8710.31
Tyrosine	neg	534076	623771	538988	1.25867e+06	931276	1.0255e+06	1.37857e+06	1.15922e+06	546309	583313	585722	610895	1.14947e+06	1.19828e+06	1.05695e+06	1.16359e+06	1.17785e+06	1.33187e+06	1.22995e+06	1.27296e+06	1.26003e+06	1.44584e+06	1.55706e+06	1.51633e+06
UDP	neg	301263	402635	366138	442528	325223	309837	520983	483582	238893	196562	187156	178816	473446	474883	389484	213699	209638	193997	378356	398302	383609	233624	264834	239584
UDP-Glc	neg	259314	345111	289133	430177	327363	344112	333806	283073	251439	206009	210554	214580	315846	337014	280432	247981	259670	271860	313336	319128	313778	312334	352277	313968
UDP-GlcNAc	neg	577125	719745	631879	1.06104e+06	791603	791092	1.54957e+06	1.16861e+06	508329	479958	480260	444969	1.25788e+06	1.27468e+06	666512	1.13631e+06	1.17151e+06	1.26465e+06	1.32855e+06	1.3105e+06	1.25786e+06	1.27786e+06	1.40449e+06	1.22591e+06
UDP-Glucuronate	neg	36302.6	53488.4	39293.5	33772.1	27725.5	33905.6	89387.9	76614.9	38261.1	21132.4	22563.4	23434.4	86293.8	93364.2	69580.8	43234.7	43853.3	52235.2	66136.6	69057.3	70390	48737.8	56036.1	48657.2
UMP	neg	62440.7	73689.1	82400.5	110164	70829	66187	308226	271054	56132.3	42374.3	42541.8	40697.1	326000	301922	265576	29380.8	25297.8	22647.9	350199	363201	340817	29924.9	64668.3	32203
Uracil	neg	98956.3	131788	121655	201918	170665	166772	121115	120244	98740.5	119682	135615	100487	106890	99616.9	96879.2	101310	98832	78737.6	85199.7	86958.7	91334.6	71482.6	86428.2	78384.4
Uric acid	neg	642.852	774.917	875.028	1307.71	1454.33	1410.18	1775.3	953.464	533.119	387.414	2068.07	684.275	2363.1	3022.7	1510.16	2190.18	4451.07	3670.29	3102.56	2490.88	2609.18	4472.12	2067.38	4389.87
Uridine	neg	71242.7	100183	93115.8	214407	106116	109155	296291	237212	67408.9	57896.1	52223.3	63816.2	269706	258973	216762	140545	149802	177488	312309	285682	275648	208465	227981	229852
UTP	pos	1244.39	1434.59	1836.04	653.265	913.031	981.922	482.825	529.024	1109.3	734.568	691.906	629.083	498.841	527.932	470.355	754.867	775.776	864.39	334.709	328.616	341.993	722.28	966.999	861.567
Valine	pos	67602.9	68141	97650.1	64702.9	83299.8	83218.9	67356.9	69297.8	59325	65286.5	63592.8	54079.2	65396.7	63776.3	64354.4	67028.7	68155.7	74921.4	63514.9	54733.3	62832.6	63282.6	83197.7	79195.4
Xanthine	neg	79281	134788	116933	411485	145829	153384	252239	182209	73857.3	72550.5	71320.5	86634.7	201652	189228	143243	136012	145226	167230	248491	213498	200331	233086	288138	255503
Xanthosine	neg	6501.46	10899.9	9921.3	20917	7633.45	7455.91	27555	22518.5	8442.39	3496.86	6143.44	4841.71	21697.3	21500.5	17116	8584.61	8897.26	10510.7	21760.6	21617	19965.8	10774.3	13214.5	12215

## Sheet: forStats
SampleID	Control_1	Control_2	Control_3	Infected_1	Infected_2	Infected_3	IFN_1	IFN_2	IFN_3	IFN+infected_1	IFN+infected_2	IFN+infected_3	Myc_1	Myc_2	Myc_3	Myc+infected_1	Myc+infected_2	Myc+infected_3	MYC+IFN_1	MYC+IFN_2	MYC+IFN_3	MYC+IFN+infected_1	MYC+IFN+infected_2	MYC+IFN+infected_3
Group	Control	Control	Control	Infected	Infected	Infected	IFN	IFN	IFN	IFN+infected	IFN+infected	IFN+infected	Myc	Myc	Myc	MYC+infected	MYC+infected	MYC+infected	MYC+IFN	MYC+IFN	MYC+IFN	MYC+IFN+infected	MYC+IFN+infected	MYC+IFN+infected
(Iso)Leucine	3.15306e+06	3.9897e+06	3.47522e+06	7.71366e+06	5.61432e+06	5.64821e+06	6.31377e+06	5.70584e+06	3.01329e+06	3.19633e+06	3.23511e+06	3.26933e+06	5.27314e+06	5.36366e+06	4.70862e+06	5.02234e+06	5.04968e+06	5.23509e+06	5.81126e+06	5.69128e+06	5.62969e+06	5.86033e+06	6.84459e+06	6.47232e+06
3-Phosphoglycerate	90597.8	114420	92216.6	166267	128866	140578	104755	93185.9	84153.6	74916.1	72805.7	89462	128413	122198	105307	135114	140691	128403	117769	107157	113219	133565	158882	138624
3-Phosphohydroxypyruvate	326.701	732.115	751.495	800.383	490.489	1074.58	1037.82	1988.9	1619.81	1499.63	1188.96	1308.22	1633.53	1992.38	2817.2	1658.41	1200.43	1005.38	1790.24	2694.17	2573.55	1207.14	973.737	1021.12
a-Ketoglutarate	18344.9	25533.7	17409.2	41462.8	26368.6	29735.2	14229.8	11260.9	13858.5	19195.5	15122.5	17276.5	13922.6	15964.5	12475.7	28968.5	26610.3	30437.4	16543.8	13721.7	14941.9	39495.4	60636.2	30335.7
Acetoacetate	395367	638552	544512	1.55215e+06	711631	708444	662736	561685	365208	430391	402368	438708	562524	535354	479486	488440	514374	519204	648511	589710	590531	634491	831690	673694
Aconitate	84578.4	140821	95156.5	285933	197808	226777	39655.9	23321.5	78963.7	141405	116664	120761	55542	50613.6	37943.3	355210	319839	350024	50604.5	41105.6	37612.7	386198	467428	378719
Adenine	174159	206552	164630	281302	216694	194359	188461	155374	91365.5	95885.9	103387	99617.9	151325	142862	124974	117965	147146	137232	167246	153543	147792	155967	199343	179385
Adenosine	2819.06	4192.14	3932.42	7047.35	4833.59	4580.67	52845.1	47465.1	5813.8	3617.87	4029.28	4253.05	39073.2	41755.4	37755.2	13646.8	14861	17649.2	49892.9	47281.8	47701.4	22363.6	20559.2	20420.5
ADP	324046	392613	353174	660453	508754	474588	599436	537170	236874	273217	275123	258853	524409	517534	452759	319956	310665	309675	495495	503223	480007	364493	412697	380950
Alanine	354003	479210	399100	905610	712178	736681	554208	508878	365676	441899	421909	440032	551750	584868	480970	730814	744470	800691	586144	609263	585859	837646	1.00941e+06	931696
AMP	53428	62368.6	62550.3	99276.5	64775.3	51426.5	362295	307742	38585.2	32837.8	30592.6	25577.5	345149	321519	292990	21166.1	16798.8	16162.3	452318	431700	405140	21721.5	25105.7	24081.8
Arginine	54719.8	75486.2	70547.9	945.736	0	170.368	171611	145542	53095.2	329.972	248.715	16.9194	141250	140751	125444	619.44	117.111	198.716	161114	153317	154736	1644.29	3664.24	421.403
Asparagine	4050.33	6722.28	5806.76	44379.4	38385.5	39603.3	12308.5	11758.8	8171.54	24036.1	20348.9	22925	10751.3	11032.6	10542.6	34713.8	33038.9	35972.6	13549.9	11787.2	11902.9	36982	45420.4	40462
Aspartate	202964	305668	203760	726450	663928	693124	114868	106502	173699	469578	397590	450756	114048	113893	106732	358000	309103	346286	112123	108895	114089	367412	470147	394918
ATP	445811	619901	482182	1.03396e+06	882196	879191	458808	395670	395730	497565	501865	509267	383371	411897	320534	843889	824584	864183	324869	339251	320103	941806	1.08116e+06	988052
Biotin	6.85769	4.39487	1.76082	6.36391	2.21745	4.50972	39.9071	42.9603	4.74978	3.07541	3.4208	3.48656	43.6629	49.3138	40.9687	3.02066	0.914979	3.39378	68.8488	49.1685	58.1826	5.23933	2.94238	6.6775
cAMP	1.6865	2.53895	4.99183	1.43566	3.58919	4.80321	21.8096	19.7589	6.63867	4.38121	1.4211	3.94237	19.8692	14.2456	15.4069	6.482	8.63755	9.46512	23.1927	18.0796	19.6728	11.2281	7.77934	8.18982
Carbamoylaspartate	8677.23	13618	9212.07	17691.8	11866.6	15957.4	8335.11	8410.77	6640.49	7245.32	6204.89	6600.07	10056.4	10001.5	8021.06	14841.2	14868.7	14660.2	7127.97	8317.93	8504.24	9056.63	13403.3	8991.87
Carnitine	6004.92	7498.99	8735.13	11379	14818.7	19113.6	8815.78	8477.41	7620.19	13997.4	11066.5	11395.2	7124.79	6902.15	6806.88	18067.5	16867.7	20387.4	6274.65	5570	5727.72	15036.3	23064.8	17819.3
CDP	49096.2	66404.4	61397.4	85439.7	63823.8	62026.8	79577	73777.8	42954.9	35753.2	36840.6	36129.2	74808.1	75890	60100.7	50295.5	49612.2	50854.9	58232.9	59756.9	57107.1	57748.1	68683	62361.2
Choline	2175.5	2617.18	3863.1	4863.18	3034.6	3450.85	14488.9	11667.3	3316.3	3867.44	3392.29	3550.88	12247.2	10378.4	13104.3	2558.31	2693.61	3719.53	25593.8	21533.5	25009.4	4883.51	8237.09	7276.42
Citrate	3.76518e+06	6.05837e+06	4.30252e+06	1.23182e+07	8.18027e+06	9.32957e+06	3.31275e+06	2.27904e+06	3.58298e+06	5.369e+06	4.76993e+06	5.22964e+06	4.24591e+06	3.96141e+06	2.98372e+06	1.58208e+07	1.52366e+07	1.69565e+07	4.48649e+06	3.42061e+06	3.07604e+06	1.84406e+07	1.93248e+07	1.86e+07
Citrulline	3194.95	3985.2	3261.02	38068.5	27020	27066.5	7818.94	7384.32	3228.92	15886.1	14746	16740.2	5830.67	6781.77	6510.94	29094.6	28406.2	30707.1	7127.51	7518.96	6829.94	37791	36745.9	40056.9
CMP	1128.4	1675.97	2696.94	3317.08	1635.12	2022.66	30189.1	26801.1	2411.53	1838.26	1382.04	1434.13	30516	27885.3	25956.4	2271.86	2032.11	1992.55	34685.6	35783.1	32396.5	2913.02	4247.46	3688.68
CTP	75890.3	105168	87038	118637	95439.7	91936.6	62645	56634.5	66867.7	55260	54581.9	54803.8	55670.1	61308	43827	88560.5	86813	91275.8	36392.8	39036.6	36960.5	105186	122448	107906
Cystathionine	86838	120559	103376	283483	241677	243523	101647	88533.1	107427	160962	163030	165963	98303.2	100164	86448.6	175294	167548	177068	114376	115153	115983	224689	254695	240748
Cysteine	127.627	150.371	74.2994	67.73	422.278	330.201	837.163	544.469	286.315	374.792	437.398	528.02	1177.32	1551.91	1506.75	1768.29	1759.53	2398.87	2611.93	5280.24	4099.07	4655.29	1910.74	2825.97
Cytidine	1.19674e+06	1.56118e+06	1.28236e+06	2.17476e+06	1.73316e+06	1.69688e+06	1.95819e+06	1.66091e+06	973143	890230	885588	893681	1.7147e+06	1.74169e+06	1.52638e+06	1.47381e+06	1.46468e+06	1.55033e+06	1.66929e+06	1.69304e+06	1.67695e+06	1.7215e+06	1.93299e+06	1.79583e+06
Cytosine	172048	176035	195499	205490	200928	218419	167060	164235	163431	188052	176190	160806	177579	173377	180596	151981	162215	178572	186008	155184	176893	150560	181831	168818
dAMP	143.187	312.939	273.291	877.752	374.424	527.38	1165.11	1169.31	309.312	328.486	167.262	167.796	1026.74	1013.69	1127.79	453.622	149.909	268.584	1218.16	1415.27	1221.73	221.929	36.7732	327.968
dCMP	11249.6	15949.3	10898	22604.5	17768.3	18907.6	17912.3	16024.6	13142.6	13445.3	13076.8	12670.5	13596.9	15845.3	14945.8	19200.6	17300.7	19661.3	18109.7	15230.1	15597.4	22816.5	783.179	17790.6
Deoxyadenosine	201.081	174.207	196.607	420.852	153.339	170.223	177.35	191.399	98.8501	212.535	182.426	119.402	150.742	136.533	147.505	120.947	117.859	126.017	134.255	126.139	142.65	87.5993	148.484	149.729
Deoxyguanosine	2819.06	4248.19	4082.96	7396.33	4906.06	4580.67	52911.7	47465.1	5821.43	3742.81	4075.99	4298.56	39113.6	41755.4	37755.2	13673	14861	17649.2	49893.1	47302.4	47783.1	22363.6	20559.2	20432.8
Deoxyinosine	209.799	357.103	332.662	1880.65	712.383	1425.65	3271.24	2916.04	602.589	640.28	727.269	950.483	3678.93	1574.17	2624.79	884.94	1344.72	1393.55	2355.1	2387.27	2122.88	1527.76	2315.01	3187.25
Deoxyribose-phosphate	16997.1	22724.5	20815.3	50942	27959.1	22528.7	22209.9	18128	14287.5	14289.9	9772.46	13517.2	15839.3	13635.3	12217.5	12261.1	14393.8	11625.4	14256.8	13442	11891	11313.5	14900	13424.6
Deoxyuridine	3594.73	6314.12	6103.86	10677.2	7533.56	9663.26	11508.8	10093.3	5814.73	5804.11	5993.27	5675.84	7667.59	6854.06	8184.95	7336.1	7353.57	8376.33	8666.21	8784.87	7484.58	9885.34	8875.23	7993.32
dGMP	53428	62368.6	62550.3	99276.5	64775.3	51426.5	362295	307742	38585.2	32837.8	30596.1	25577.5	345149	321519	292990	21166.1	16798.8	16162.3	452318	431700	405194	21721.5	25105.7	24081.8
dGTP	445811	619901	482182	1.03396e+06	882196	879191	458808	395670	395730	497565	501865	509267	383371	411897	320534	843889	824584	864183	324869	339251	320103	941806	1.08116e+06	988052
Dihydroorotate	9168.87	11844.4	11156.7	13526.3	13202.6	12909.3	5491.65	3964.01	12964.2	6682.69	12658.1	6863.4	3586.73	3098.65	2320.47	23417.5	29905	30522.3	3158.36	2032.08	2561.47	39520.1	37385.5	26348
Dihydroxyacetone phosphate	370886	490258	444157	665185	550188	476733	906513	803319	329152	278645	268748	264557	736147	734222	614220	549800	563956	533567	658235	695648	668025	553844	600662	547434
dTDP	584.772	425.887	1268.85	4646.54	1929.84	2456.67	3464.61	1473.56	950.718	1226.29	1342.44	1403.36	3869.56	3538.4	2344.97	3381.54	3666.97	3556.01	2368.16	2541.87	2173.18	3906.34	4266.59	4340.18
dTMP	52.3226	185.426	521.644	1617.4	1217.38	893.061	6478.44	5863.07	1161.15	1224.03	978.462	1097.57	6526.54	8481.66	7873.79	604.206	1753.26	1275.53	19471.1	21771	20882.3	2378.24	3085.51	2088.3
Erythrose-4-phosphate	25024.5	32561.4	35942.2	48315.1	43786.3	38334.6	104255	85754.1	32205.2	29028	26461.9	25125.3	69946.7	77610.6	65257.4	34056.8	43996.4	34134.3	73178.4	73332.9	78621.6	51844.6	45530.7	42350.7
FAD	428.845	477.652	318.127	708.791	153.87	353.83	595.605	408.691	193.6	319.587	108.353	190.414	1100.36	863.288	660.787	153.927	568.456	949.165	70.128	774.79	438.856	997.089	1636.4	628.719
Fructose-1,6-bisphosphate	416830	602832	631850	1.01132e+06	807394	751727	4.77832e+06	4.4818e+06	797360	550168	522376	474712	4.27095e+06	4.37287e+06	4.06664e+06	833474	764500	650476	4.72485e+06	4.96006e+06	4.81745e+06	804595	748568	703144
Fumarate	33398.9	40022.3	32061.7	65521.6	51121.9	52814.4	19204.1	17969.2	18743.3	29638.7	27236.6	28442.5	18357.9	16574.9	17199.4	33580.3	31625.1	35681.8	19176.2	17499.7	15397.8	51349.5	108701	49280.1
GDP	84251.6	105161	103378	151469	114559	107683	262901	231851	76698.5	67863.2	65127.4	61573.4	199464	206045	172390	104270	106605	104895	179436	190375	177355	127178	136809	128358
Gluconate	273063	352977	301063	445910	314505	325124	1.16735e+06	991921	318245	205241	181689	199565	909003	912455	784160	526028	505739	585453	917557	963878	932743	686607	674353	618294
Glucosamine	1539.52	1661.74	2246.15	2455.89	1343.56	1376.58	901.38	816.519	766.314	784.094	1293.19	938.371	776.801	606.697	565.278	576.556	579.688	694.032	646.762	472.792	479.416	547.246	950.036	1148.42
Glucosamine-phosphate	5312.53	7398.42	5143.5	9200.97	7970.59	7825.88	27054.1	26053.8	7490.65	6815.91	9719.28	8755.29	21541.8	19997.2	18112.7	7794.33	7554.71	9739.36	19159.3	19470.9	18201.9	11743.9	16150.2	18448
Glutamate	1.35537e+06	1.94851e+06	1.41889e+06	3.44998e+06	2.85423e+06	3.05561e+06	1.39374e+06	1.19844e+06	1.26579e+06	2.0281e+06	1.74701e+06	1.97308e+06	1.44825e+06	1.44005e+06	1.22249e+06	2.65927e+06	2.5094e+06	2.78339e+06	1.34845e+06	1.35306e+06	1.33057e+06	2.73999e+06	3.59829e+06	2.95363e+06
Glutamine	1469.07	1372.36	1347.03	1904.68	1692.22	1923.69	845.041	1024.44	912.158	2299.38	1502.69	1514.23	906.443	902.028	991.2	950.557	940.991	1176.08	989.059	840.066	982.021	901.253	1943.95	1448.45
Glycerol-3-phosphate	23927.3	25219.7	26398.9	40929.1	31429	32354.7	110150	93462.4	25104.1	18854.2	19388.5	22255.2	103242	101175	93342.9	49106.5	48491.3	54860.7	127013	121434	116266	70494.6	81995.3	81933.7
Glycine	388070	509177	442577	878550	664136	665093	980209	863194	418885	394064	387508	397101	780982	797485	692530	788670	790221	857419	876692	856574	863152	978723	1.14967e+06	1.06132e+06
GMP	10725	10615	10491.3	13362.5	10948.8	10032.8	75555.9	67550.5	8838.78	4465.92	5666.86	4290.44	52068	51457.3	48023.1	10663.9	9489.55	8178.52	66644.9	65427.4	64147.6	8309.77	8252.51	7600.55
GSH	996241	1.369e+06	973579	1.86597e+06	1.64037e+06	1.69344e+06	1.30024e+06	1.3084e+06	1.0197e+06	967873	986046	941136	1.06634e+06	1.24937e+06	1.03102e+06	1.60324e+06	1.50479e+06	1.64989e+06	1.17824e+06	973661	1.09971e+06	1.71536e+06	169686	1.46601e+06
GSSG	2199.92	2616.85	3479.92	2012.88	2784.2	2723.53	1592.14	1402	1704.28	2305.73	1882.09	1901.69	1915.82	1635.35	1579.63	1928.87	2045.76	2099.97	1398.67	1601.45	1452.35	1628.42	5720.14	2655.89
GTP	2167.95	2281.7	3290.35	1890.28	2541.85	2706.26	2308.37	2349.87	2013.65	2068.53	1963.53	1723.28	1991.52	2073.19	1883.82	2746.05	3001.1	3164.9	1537.53	1397.09	1485.06	2739.73	3399.87	3278.92
Guanine	323.958	324.262	582.024	401.53	471.415	484.364	4832.69	4730.72	519.132	436.551	481.227	372.824	4103.78	3678.23	4176.95	348.516	366.156	399.104	5588.97	4604.9	4985.91	426.13	505.699	628.779
Guanosine	5785.37	9872.43	12613.3	21925.8	15845.7	12975.5	231876	210599	18723.4	10782.5	18047	10962.7	166992	149685	153016	6840.4	7155.04	6822.85	226907	211577	205186	9020.43	6567.91	7563.81
Hexosephosphate	213946	261162	219223	432863	370437	351137	809887	751748	264646	253218	238848	247351	578951	604255	571155	273910	264677	279403	656759	701729	662899	332267	387685	356205
Histidine	811278	1.06329e+06	958611	2.26832e+06	1.61306e+06	1.68622e+06	2.30888e+06	1.96616e+06	937994	908440	910201	957388	1.946e+06	2.00791e+06	1.77703e+06	1.79028e+06	1.79728e+06	1.93971e+06	2.23023e+06	2.20504e+06	2.19563e+06	2.30568e+06	2.58202e+06	2.42521e+06
Homocysteine	0	0	0.761247	0.513817	0	0.00200234	0.130009	0.366303	0	0.736884	0.454992	0	0	2.07866	3.7127	3.5395	5.11252	4.51577	3.02765	1.61181	7.91953	8.54863	6.45839	6.63784
Homoserine	1.78117e+06	2.18968e+06	1.89766e+06	4.07315e+06	3.12806e+06	3.075e+06	3.02205e+06	2.62326e+06	1.6019e+06	1.73217e+06	1.70761e+06	1.79037e+06	2.61773e+06	2.74309e+06	2.32708e+06	3.13999e+06	3.08117e+06	3.40494e+06	2.80265e+06	2.86988e+06	2.77401e+06	3.72091e+06	4.42316e+06	4.02392e+06
Hydroxybutyrate	31668.7	44946	43499.8	109082	54007.3	59248.4	78874.8	61854.8	32871.3	40082.3	32787	37492.4	66058.3	63735.1	50421.3	62094	66305.7	67435.5	73334.4	65960.8	61284	76311.1	116753	85152.5
Hypoxanthine	360.346	515.264	933.355	964.871	552.487	751.298	1072.15	888.068	450.173	973.53	966.149	1376.06	1303.16	1104.41	1410.13	474.874	435.396	588.134	2349.52	1794.35	2343.79	552.298	1136.49	811.642
IMP	245.577	559.896	208.438	3218.67	1127.77	1239.65	100.337	182.276	365.258	2369.09	2341.71	3918.72	108.69	140.41	118.634	185.613	351.341	602.231	723.676	655.723	1309.47	116.12	1156	735.856
Inosine	72630.5	135318	109425	432287	117939	129140	195054	144261	76981.9	100792	101002	139970	173655	147546	151425	100759	117564	133361	258926	223194	228349	170980	235849	173763
Lactate	4.45246e+06	6.33848e+06	6.06875e+06	1.60237e+07	7.50339e+06	7.4051e+06	1.35814e+07	9.84629e+06	4.65548e+06	4.62686e+06	4.17802e+06	4.91588e+06	1.17889e+07	1.17759e+07	8.65071e+06	8.51308e+06	9.10505e+06	1.04469e+07	1.5342e+07	1.3611e+07	1.24842e+07	1.60828e+07	1.91076e+07	1.62567e+07
Lysine	133643	185606	174020	547568	283573	273120	507546	397924	133100	154553	156188	163302	417486	423784	366745	333880	354844	387529	488883	468209	456648	454257	533825	484048
Malate	445714	531482	351792	886943	646426	644791	243523	192343	219498	327876	296947	308285	195246	178924	155158	335759	317510	344515	196235	162197	154457	367830	632427	397370
Methionine	290417	350568	298743	663817	487079	508640	643018	584274	284144	276263	280222	286681	532966	563267	496616	523655	524270	551879	600889	602690	599454	625965	664164	673848
Mevalonate	26551.1	46708.5	38038.3	110208	43583.8	35107.9	50142.9	36559.7	23210.9	22871.2	19746.5	23790	42371.4	39068.7	33177.4	35532	57414	37518.1	64030.7	52813.7	48604	34598.7	71930.9	45959.8
myo-Inositol	6.24741e+06	9.92774e+06	8.55048e+06	2.40685e+07	1.12331e+07	1.12781e+07	1.10451e+07	9.26957e+06	5.93005e+06	6.53272e+06	6.13024e+06	6.82436e+06	9.11909e+06	8.7104e+06	7.6471e+06	7.65662e+06	8.04493e+06	8.30627e+06	1.04702e+07	9.65757e+06	9.56082e+06	1.01604e+07	1.10043e+07	1.03479e+07
N-Acetylneuraminic acid	17247.4	22654.2	20614.6	48045.4	27374.7	27504.2	29897.2	26078.2	14479.6	18390	16677.2	16633.3	25461.2	23532.8	21202.9	25019	24382.1	28910.1	27631.1	26534.2	28376	32927.4	32273.2	34457.2
N-Acetylornithine	1659.85	2524.81	2000.88	5355.75	3177.22	3756.28	5713.3	5432.66	1871.16	2371.98	2261.62	2146.44	3885.54	4766.24	3955.33	4263.54	3910.05	4705.22	4463.27	5497.38	5289.69	6065.85	6441.65	5831.48
NAD+	1635.29	1764.75	2374.09	1626.25	2316.63	2303.09	1885.51	1896.95	1333.67	1620.39	1481.22	1389.64	2332.93	2359.63	2312.79	2094.32	2235.45	2566.17	1992.21	1798.67	1969.29	1819.04	3018.62	2471.28
NADH	34.0187	32.242	54.1351	19.7156	22.8675	34.7634	248.738	233.634	36.6625	23.4331	28.3563	24.2903	235.274	264.627	227.434	74.0874	88.4886	92.5563	215.597	175.145	215.117	84.2545	93.2378	115.077
NADP+	17.1161	21.4414	38.9338	22.503	29.9638	32.0607	25.7423	14.6467	25.6523	18.727	16.7519	16.8838	10.0445	30.6761	22.5765	27.3576	45.6671	60.6368	19.5501	23.148	23.6108	53.5722	66.5752	51.6915
NADPH	5.89434	3.24928	0	3.53398	2.87192	4.57655	1.00915	2.41328	8.70834	8.34486	7.20593	5.81426	0	1.29958	0	3.99722	1.56641	0	1.32532	0	0	1.50462	12.8941	8.40844
Nicotinamide	9315.65	10987.3	15362.9	13627.3	11799.1	11993.6	10408	9495.18	7190.81	7790.2	7889.26	7357.25	12899.1	12077.8	11696.7	10270.1	10797.6	13435.3	12385.1	10116.5	11880.4	11097	13765	11754.9
Nicotinate	9.12143	8.10492	22.6873	11.2686	13.3623	12.8209	7.12798	8.36659	6.5158	15.8699	11.1189	8.49524	5.06991	5.65884	10.6262	13.7712	15.1969	17.6283	6.51516	5.35291	5.5031	15.1253	12.5106	7.7244
Ornithine	1042.94	1041.61	1612.08	4397.02	4810.18	4650.87	1397.54	1484.84	947.069	3418.5	3458.1	2956.81	1516.33	1439.56	1498.32	3484.8	3237.48	3847.5	1572.29	1271.14	1472.63	3386.27	4098.19	4459.43
Orotate	0	124.366	1064.5	427.52	450.639	319.834	424.799	192.118	358.184	159.446	2144.97	410.397	65.6221	485.178	431.655	56.6445	76.8073	531.443	84.1803	527.271	644.362	131.993	2300.18	65.1912
Oxaloacetate	1282.93	1023.78	313.077	4633.48	2517.36	2393.92	250.159	288.381	917.403	3280.2	2979.49	2616.75	341.693	112.598	777.351	1636.95	2334.07	1482.91	609.923	850.858	1235.86	1872.09	1639.98	2287.34
Pantothenate	212345	275090	233018	593864	408220	451587	240654	207888	204957	293780	255721	302241	223811	228211	189827	264444	270228	281413	248769	234167	232125	324860	293333	299762
Pentose-5-phosphate	50486	74366.6	65437.4	89418.9	73931.8	56640.4	102202	97300.2	47078.7	42507.8	37319.1	38522.7	80970.5	80355.6	78693	33869.1	33211.6	30859.4	84312.3	95721.4	94886.5	36879.6	34097.9	32798.1
Phenylalanine	1.19878e+06	1.45397e+06	1.27782e+06	2.83073e+06	2.06833e+06	2.09312e+06	2.5751e+06	2.25221e+06	1.1305e+06	1.1706e+06	1.1966e+06	1.20241e+06	2.16369e+06	2.1977e+06	1.93595e+06	2.07771e+06	2.11765e+06	2.25051e+06	2.31204e+06	2.32366e+06	2.29442e+06	2.4492e+06	2.77343e+06	2.6968e+06
Phenylpyruvate	117735	148360	128625	227951	175151	154420	145837	131750	90329.4	93962	90175.9	88484.2	124244	116080	106823	100129	106723	99059	124158	116854	116866	110544	142265	124849
Phosphoenolpyruvate	39458	55254.2	47040.4	82600	61722.1	65115.1	57425	52173.4	41283.7	37021.2	36859.7	38525	44392.8	44307.6	37027.8	42621.7	37850.2	30662.1	39989.5	34884.1	38199.6	37582.4	69736.1	58789.9
Phosphoserine	152.143	850.764	148.669	469.908	1436.62	1715.99	31.4118	90.8982	215.287	1265.44	841.537	883.338	121.99	75.6914	121.896	35.2263	32.3171	84.6373	34.4659	0	30.2651	227.589	399.476	140.895
Proline	517796	670676	576719	1.38249e+06	1.03072e+06	1.0456e+06	1.74437e+06	1.49246e+06	539051	597409	584710	591289	1.59739e+06	1.61548e+06	1.36387e+06	1.80407e+06	1.79934e+06	2.02329e+06	1.65462e+06	1.6214e+06	1.57887e+06	2.12006e+06	2.57077e+06	2.19923e+06
PRPP	634.249	2274.77	855.048	0	84.0762	72.8862	137.647	52.2898	770.637	33.5045	45.9505	58.0628	0	99.6356	80.9516	69.511	44.8186	151.794	83.8843	35.2655	32.4188	0	145.096	73.1096
Pyridoxine	215024	337562	288945	851543	340098	348024	455608	401062	202796	198235	179590	204309	387810	359448	317426	310524	330431	329990	408328	371461	354684	334660	368642	345611
Pyruvate	640699	997163	794859	2.15728e+06	1.01499e+06	895293	906406	740175	455096	451064	453390	466196	672762	631381	541380	555411	619175	609175	725160	591173	590734	667931	1.22424e+06	748674
S-Adenosylhomocysteine	60.8749	397.52	385.954	333.807	387.952	365.65	1052.63	1511.44	659.231	486.446	193.641	151.959	586.683	617.314	683.043	510.395	1209.43	1524.53	1068.85	940.069	833.203	2409.53	102.288	990.772
S-Adenosylmethionine	310.543	315.951	457.682	297.891	462.224	445.206	474.064	451.651	297.624	476.674	408.596	355.449	490.536	498.952	521.485	392.943	288.08	395.518	453.235	432.544	494.794	420.344	439.502	439.554
Serine	114867	188079	130436	367039	296354	321762	28685.6	24281.3	131490	213443	192698	214601	23813.4	24905.5	21314.4	28093.7	27922.2	28462.9	28288.5	29027.1	27629.3	34917.1	45891.2	39340.9
Spermidine	0.114056	0.752716	0.700842	0.184693	0.326276	1.63951	1.35679	1.81662	0	0.270317	0.0936648	0.363569	3.13048	0.358275	0.419711	0.307942	2.2751	1.7209	1.50633	1.63731	1.37515	0.741748	1.50256	0.395819
Succinate	196324	258286	216646	424266	298353	267800	240160	226874	163107	173125	157332	164338	200754	181994	172361	171918	182993	170244	206007	188743	182560	193219	305912	218241
Taurine	1.18575e+06	1.51966e+06	1.2794e+06	1.95765e+06	1.48826e+06	1.5969e+06	3.08043e+06	2.78958e+06	1.20661e+06	901963	807064	889196	2.52769e+06	2.44426e+06	2.07006e+06	1.9772e+06	1.97235e+06	2.15819e+06	2.72163e+06	2.75177e+06	2.60509e+06	2.53256e+06	2.73518e+06	2.30355e+06
Thiamine (+)	42.7333	45.1352	62.0666	86.0225	52.5589	139.156	886.28	471.436	34.5467	40.8641	54.7339	125.068	826.759	347.641	369.417	569.153	916.4	833.096	543.114	588.532	286.372	496.866	769.629	298.127
Thiamine pyrophosphate (+)	54.3288	0	0	0	0	112.24	417.31	265.06	111.824	185.427	91.3726	105.048	272.389	329.498	312.336	168.473	308.109	117.125	332.533	260.231	229.038	40.7353	103.484	147.375
Threonine	1.76805e+06	2.16959e+06	1.88049e+06	4.0344e+06	3.09122e+06	3.03871e+06	2.98663e+06	2.5857e+06	1.57723e+06	1.70587e+06	1.68316e+06	1.76581e+06	2.58467e+06	2.70667e+06	2.29273e+06	3.0968e+06	3.04012e+06	3.35666e+06	2.75663e+06	2.8254e+06	2.72374e+06	3.66074e+06	4.35929e+06	3.96477e+06
Thymidine	28321.2	43871.5	35600	88344.8	48678.6	50237.4	60914.6	52649.2	28669.1	29569.4	27015.8	30861	45713.6	42399	38769.6	37642	37961.8	41415	53165.3	50063.7	50536.5	52373.4	54275.4	52248.3
Thymine	61.9099	53.4249	83.7478	54.3779	66.0848	80.9184	181.164	182.805	57.9849	65.2817	57.6802	59.7843	190.204	182.04	205.691	184.884	180.258	209.856	202.709	196.344	195.888	197.517	339.643	245.526
Tryptophan	122837	144591	128433	307315	222162	246988	73926.4	70403.5	93442.5	108829	114640	116515	268442	280048	249011	270750	271450	307197	101147	114877	111528	149323	152794	168613
TTP	374.289	1434.54	1377.55	1712.24	1185.93	2445.2	181.975	99.4285	2224.45	1601.14	2060.12	2189.74	0	620.431	340.461	4938.96	7956.65	8663.74	309.484	530.145	293.288	5673.91	7380.52	8710.31
Tyrosine	534076	623771	538988	1.25867e+06	931276	1.0255e+06	1.37857e+06	1.15922e+06	546309	583313	585722	610895	1.14947e+06	1.19828e+06	1.05695e+06	1.16359e+06	1.17785e+06	1.33187e+06	1.22995e+06	1.27296e+06	1.26003e+06	1.44584e+06	1.55706e+06	1.51633e+06
UDP	301263	402635	366138	442528	325223	309837	520983	483582	238893	196562	187156	178816	473446	474883	389484	213699	209638	193997	378356	398302	383609	233624	264834	239584
UDP-Glc	259314	345111	289133	430177	327363	344112	333806	283073	251439	206009	210554	214580	315846	337014	280432	247981	259670	271860	313336	319128	313778	312334	352277	313968
UDP-GlcNAc	577125	719745	631879	1.06104e+06	791603	791092	1.54957e+06	1.16861e+06	508329	479958	480260	444969	1.25788e+06	1.27468e+06	666512	1.13631e+06	1.17151e+06	1.26465e+06	1.32855e+06	1.3105e+06	1.25786e+06	1.27786e+06	1.40449e+06	1.22591e+06
UDP-Glucuronate	36302.6	53488.4	39293.5	33772.1	27725.5	33905.6	89387.9	76614.9	38261.1	21132.4	22563.4	23434.4	86293.8	93364.2	69580.8	43234.7	43853.3	52235.2	66136.6	69057.3	70390	48737.8	56036.1	48657.2
UMP	62440.7	73689.1	82400.5	110164	70829	66187	308226	271054	56132.3	42374.3	42541.8	40697.1	326000	301922	265576	29380.8	25297.8	22647.9	350199	363201	340817	29924.9	64668.3	32203
Uracil	98956.3	131788	121655	201918	170665	166772	121115	120244	98740.5	119682	135615	100487	106890	99616.9	96879.2	101310	98832	78737.6	85199.7	86958.7	91334.6	71482.6	86428.2	78384.4
Uric acid	642.852	774.917	875.028	1307.71	1454.33	1410.18	1775.3	953.464	533.119	387.414	2068.07	684.275	2363.1	3022.7	1510.16	2190.18	4451.07	3670.29	3102.56	2490.88	2609.18	4472.12	2067.38	4389.87
Uridine	71242.7	100183	93115.8	214407	106116	109155	296291	237212	67408.9	57896.1	52223.3	63816.2	269706	258973	216762	140545	149802	177488	312309	285682	275648	208465	227981	229852
UTP	1244.39	1434.59	1836.04	653.265	913.031	981.922	482.825	529.024	1109.3	734.568	691.906	629.083	498.841	527.932	470.355	754.867	775.776	864.39	334.709	328.616	341.993	722.28	966.999	861.567
Valine	67602.9	68141	97650.1	64702.9	83299.8	83218.9	67356.9	69297.8	59325	65286.5	63592.8	54079.2	65396.7	63776.3	64354.4	67028.7	68155.7	74921.4	63514.9	54733.3	62832.6	63282.6	83197.7	79195.4
Xanthine	79281	134788	116933	411485	145829	153384	252239	182209	73857.3	72550.5	71320.5	86634.7	201652	189228	143243	136012	145226	167230	248491	213498	200331	233086	288138	255503
Xanthosine	6501.46	10899.9	9921.3	20917	7633.45	7455.91	27555	22518.5	8442.39	3496.86	6143.44	4841.71	21697.3	21500.5	17116	8584.61	8897.26	10510.7	21760.6	21617	19965.8	10774.3	13214.5	12215

## Sheet: forStats infection
SampleID	Control_1	Control_2	Control_3	Infected_1	Infected_2	Infected_3	IFN_1	IFN_2	IFN_3	IFN+infected_1	IFN+infected_2	IFN+infected_3	Myc_1	Myc_2	Myc_3	Myc+infected_1	Myc+infected_2	Myc+infected_3	MYC+IFN_1	MYC+IFN_2	MYC+IFN_3	MYC+IFN+infected_1	MYC+IFN+infected_2	MYC+IFN+infected_3
Group	NoInfection	NoInfection	NoInfection	Infection	Infection	Infection	NoInfection	NoInfection	NoInfection	NoInfection	NoInfection	NoInfection	NoInfection	NoInfection	NoInfection	Infection	Infection	Infection	NoInfection	NoInfection	NoInfection	Infection	Infection	Infection
(Iso)Leucine	3.15306e+06	3.9897e+06	3.47522e+06	7.71366e+06	5.61432e+06	5.64821e+06	6.31377e+06	5.70584e+06	3.01329e+06	3.19633e+06	3.23511e+06	3.26933e+06	5.27314e+06	5.36366e+06	4.70862e+06	5.02234e+06	5.04968e+06	5.23509e+06	5.81126e+06	5.69128e+06	5.62969e+06	5.86033e+06	6.84459e+06	6.47232e+06
3-Phosphoglycerate	90597.8	114420	92216.6	166267	128866	140578	104755	93185.9	84153.6	74916.1	72805.7	89462	128413	122198	105307	135114	140691	128403	117769	107157	113219	133565	158882	138624
3-Phosphohydroxypyruvate	326.701	732.115	751.495	800.383	490.489	1074.58	1037.82	1988.9	1619.81	1499.63	1188.96	1308.22	1633.53	1992.38	2817.2	1658.41	1200.43	1005.38	1790.24	2694.17	2573.55	1207.14	973.737	1021.12
a-Ketoglutarate	18344.9	25533.7	17409.2	41462.8	26368.6	29735.2	14229.8	11260.9	13858.5	19195.5	15122.5	17276.5	13922.6	15964.5	12475.7	28968.5	26610.3	30437.4	16543.8	13721.7	14941.9	39495.4	60636.2	30335.7
Acetoacetate	395367	638552	544512	1.55215e+06	711631	708444	662736	561685	365208	430391	402368	438708	562524	535354	479486	488440	514374	519204	648511	589710	590531	634491	831690	673694
Aconitate	84578.4	140821	95156.5	285933	197808	226777	39655.9	23321.5	78963.7	141405	116664	120761	55542	50613.6	37943.3	355210	319839	350024	50604.5	41105.6	37612.7	386198	467428	378719
Adenine	174159	206552	164630	281302	216694	194359	188461	155374	91365.5	95885.9	103387	99617.9	151325	142862	124974	117965	147146	137232	167246	153543	147792	155967	199343	179385
Adenosine	2819.06	4192.14	3932.42	7047.35	4833.59	4580.67	52845.1	47465.1	5813.8	3617.87	4029.28	4253.05	39073.2	41755.4	37755.2	13646.8	14861	17649.2	49892.9	47281.8	47701.4	22363.6	20559.2	20420.5
ADP	324046	392613	353174	660453	508754	474588	599436	537170	236874	273217	275123	258853	524409	517534	452759	319956	310665	309675	495495	503223	480007	364493	412697	380950
Alanine	354003	479210	399100	905610	712178	736681	554208	508878	365676	441899	421909	440032	551750	584868	480970	730814	744470	800691	586144	609263	585859	837646	1.00941e+06	931696
AMP	53428	62368.6	62550.3	99276.5	64775.3	51426.5	362295	307742	38585.2	32837.8	30592.6	25577.5	345149	321519	292990	21166.1	16798.8	16162.3	452318	431700	405140	21721.5	25105.7	24081.8
Arginine	54719.8	75486.2	70547.9	945.736	0	170.368	171611	145542	53095.2	329.972	248.715	16.9194	141250	140751	125444	619.44	117.111	198.716	161114	153317	154736	1644.29	3664.24	421.403
Asparagine	4050.33	6722.28	5806.76	44379.4	38385.5	39603.3	12308.5	11758.8	8171.54	24036.1	20348.9	22925	10751.3	11032.6	10542.6	34713.8	33038.9	35972.6	13549.9	11787.2	11902.9	36982	45420.4	40462
Aspartate	202964	305668	203760	726450	663928	693124	114868	106502	173699	469578	397590	450756	114048	113893	106732	358000	309103	346286	112123	108895	114089	367412	470147	394918
ATP	445811	619901	482182	1.03396e+06	882196	879191	458808	395670	395730	497565	501865	509267	383371	411897	320534	843889	824584	864183	324869	339251	320103	941806	1.08116e+06	988052
Biotin	6.85769	4.39487	1.76082	6.36391	2.21745	4.50972	39.9071	42.9603	4.74978	3.07541	3.4208	3.48656	43.6629	49.3138	40.9687	3.02066	0.914979	3.39378	68.8488	49.1685	58.1826	5.23933	2.94238	6.6775
cAMP	1.6865	2.53895	4.99183	1.43566	3.58919	4.80321	21.8096	19.7589	6.63867	4.38121	1.4211	3.94237	19.8692	14.2456	15.4069	6.482	8.63755	9.46512	23.1927	18.0796	19.6728	11.2281	7.77934	8.18982
Carbamoylaspartate	8677.23	13618	9212.07	17691.8	11866.6	15957.4	8335.11	8410.77	6640.49	7245.32	6204.89	6600.07	10056.4	10001.5	8021.06	14841.2	14868.7	14660.2	7127.97	8317.93	8504.24	9056.63	13403.3	8991.87
Carnitine	6004.92	7498.99	8735.13	11379	14818.7	19113.6	8815.78	8477.41	7620.19	13997.4	11066.5	11395.2	7124.79	6902.15	6806.88	18067.5	16867.7	20387.4	6274.65	5570	5727.72	15036.3	23064.8	17819.3
CDP	49096.2	66404.4	61397.4	85439.7	63823.8	62026.8	79577	73777.8	42954.9	35753.2	36840.6	36129.2	74808.1	75890	60100.7	50295.5	49612.2	50854.9	58232.9	59756.9	57107.1	57748.1	68683	62361.2
Choline	2175.5	2617.18	3863.1	4863.18	3034.6	3450.85	14488.9	11667.3	3316.3	3867.44	3392.29	3550.88	12247.2	10378.4	13104.3	2558.31	2693.61	3719.53	25593.8	21533.5	25009.4	4883.51	8237.09	7276.42
Citrate	3.76518e+06	6.05837e+06	4.30252e+06	1.23182e+07	8.18027e+06	9.32957e+06	3.31275e+06	2.27904e+06	3.58298e+06	5.369e+06	4.76993e+06	5.22964e+06	4.24591e+06	3.96141e+06	2.98372e+06	1.58208e+07	1.52366e+07	1.69565e+07	4.48649e+06	3.42061e+06	3.07604e+06	1.84406e+07	1.93248e+07	1.86e+07
Citrulline	3194.95	3985.2	3261.02	38068.5	27020	27066.5	7818.94	7384.32	3228.92	15886.1	14746	16740.2	5830.67	6781.77	6510.94	29094.6	28406.2	30707.1	7127.51	7518.96	6829.94	37791	36745.9	40056.9
CMP	1128.4	1675.97	2696.94	3317.08	1635.12	2022.66	30189.1	26801.1	2411.53	1838.26	1382.04	1434.13	30516	27885.3	25956.4	2271.86	2032.11	1992.55	34685.6	35783.1	32396.5	2913.02	4247.46	3688.68
CTP	75890.3	105168	87038	118637	95439.7	91936.6	62645	56634.5	66867.7	55260	54581.9	54803.8	55670.1	61308	43827	88560.5	86813	91275.8	36392.8	39036.6	36960.5	105186	122448	107906
Cystathionine	86838	120559	103376	283483	241677	243523	101647	88533.1	107427	160962	163030	165963	98303.2	100164	86448.6	175294	167548	177068	114376	115153	115983	224689	254695	240748
Cysteine	127.627	150.371	74.2994	67.73	422.278	330.201	837.163	544.469	286.315	374.792	437.398	528.02	1177.32	1551.91	1506.75	1768.29	1759.53	2398.87	2611.93	5280.24	4099.07	4655.29	1910.74	2825.97
Cytidine	1.19674e+06	1.56118e+06	1.28236e+06	2.17476e+06	1.73316e+06	1.69688e+06	1.95819e+06	1.66091e+06	973143	890230	885588	893681	1.7147e+06	1.74169e+06	1.52638e+06	1.47381e+06	1.46468e+06	1.55033e+06	1.66929e+06	1.69304e+06	1.67695e+06	1.7215e+06	1.93299e+06	1.79583e+06
Cytosine	172048	176035	195499	205490	200928	218419	167060	164235	163431	188052	176190	160806	177579	173377	180596	151981	162215	178572	186008	155184	176893	150560	181831	168818
dAMP	143.187	312.939	273.291	877.752	374.424	527.38	1165.11	1169.31	309.312	328.486	167.262	167.796	1026.74	1013.69	1127.79	453.622	149.909	268.584	1218.16	1415.27	1221.73	221.929	36.7732	327.968
dCMP	11249.6	15949.3	10898	22604.5	17768.3	18907.6	17912.3	16024.6	13142.6	13445.3	13076.8	12670.5	13596.9	15845.3	14945.8	19200.6	17300.7	19661.3	18109.7	15230.1	15597.4	22816.5	783.179	17790.6
Deoxyadenosine	201.081	174.207	196.607	420.852	153.339	170.223	177.35	191.399	98.8501	212.535	182.426	119.402	150.742	136.533	147.505	120.947	117.859	126.017	134.255	126.139	142.65	87.5993	148.484	149.729
Deoxyguanosine	2819.06	4248.19	4082.96	7396.33	4906.06	4580.67	52911.7	47465.1	5821.43	3742.81	4075.99	4298.56	39113.6	41755.4	37755.2	13673	14861	17649.2	49893.1	47302.4	47783.1	22363.6	20559.2	20432.8
Deoxyinosine	209.799	357.103	332.662	1880.65	712.383	1425.65	3271.24	2916.04	602.589	640.28	727.269	950.483	3678.93	1574.17	2624.79	884.94	1344.72	1393.55	2355.1	2387.27	2122.88	1527.76	2315.01	3187.25
Deoxyribose-phosphate	16997.1	22724.5	20815.3	50942	27959.1	22528.7	22209.9	18128	14287.5	14289.9	9772.46	13517.2	15839.3	13635.3	12217.5	12261.1	14393.8	11625.4	14256.8	13442	11891	11313.5	14900	13424.6
Deoxyuridine	3594.73	6314.12	6103.86	10677.2	7533.56	9663.26	11508.8	10093.3	5814.73	5804.11	5993.27	5675.84	7667.59	6854.06	8184.95	7336.1	7353.57	8376.33	8666.21	8784.87	7484.58	9885.34	8875.23	7993.32
dGMP	53428	62368.6	62550.3	99276.5	64775.3	51426.5	362295	307742	38585.2	32837.8	30596.1	25577.5	345149	321519	292990	21166.1	16798.8	16162.3	452318	431700	405194	21721.5	25105.7	24081.8
dGTP	445811	619901	482182	1.03396e+06	882196	879191	458808	395670	395730	497565	501865	509267	383371	411897	320534	843889	824584	864183	324869	339251	320103	941806	1.08116e+06	988052
Dihydroorotate	9168.87	11844.4	11156.7	13526.3	13202.6	12909.3	5491.65	3964.01	12964.2	6682.69	12658.1	6863.4	3586.73	3098.65	2320.47	23417.5	29905	30522.3	3158.36	2032.08	2561.47	39520.1	37385.5	26348
Dihydroxyacetone phosphate	370886	490258	444157	665185	550188	476733	906513	803319	329152	278645	268748	264557	736147	734222	614220	549800	563956	533567	658235	695648	668025	553844	600662	547434
dTDP	584.772	425.887	1268.85	4646.54	1929.84	2456.67	3464.61	1473.56	950.718	1226.29	1342.44	1403.36	3869.56	3538.4	2344.97	3381.54	3666.97	3556.01	2368.16	2541.87	2173.18	3906.34	4266.59	4340.18
dTMP	52.3226	185.426	521.644	1617.4	1217.38	893.061	6478.44	5863.07	1161.15	1224.03	978.462	1097.57	6526.54	8481.66	7873.79	604.206	1753.26	1275.53	19471.1	21771	20882.3	2378.24	3085.51	2088.3
Erythrose-4-phosphate	25024.5	32561.4	35942.2	48315.1	43786.3	38334.6	104255	85754.1	32205.2	29028	26461.9	25125.3	69946.7	77610.6	65257.4	34056.8	43996.4	34134.3	73178.4	73332.9	78621.6	51844.6	45530.7	42350.7
FAD	428.845	477.652	318.127	708.791	153.87	353.83	595.605	408.691	193.6	319.587	108.353	190.414	1100.36	863.288	660.787	153.927	568.456	949.165	70.128	774.79	438.856	997.089	1636.4	628.719
Fructose-1,6-bisphosphate	416830	602832	631850	1.01132e+06	807394	751727	4.77832e+06	4.4818e+06	797360	550168	522376	474712	4.27095e+06	4.37287e+06	4.06664e+06	833474	764500	650476	4.72485e+06	4.96006e+06	4.81745e+06	804595	748568	703144
Fumarate	33398.9	40022.3	32061.7	65521.6	51121.9	52814.4	19204.1	17969.2	18743.3	29638.7	27236.6	28442.5	18357.9	16574.9	17199.4	33580.3	31625.1	35681.8	19176.2	17499.7	15397.8	51349.5	108701	49280.1
GDP	84251.6	105161	103378	151469	114559	107683	262901	231851	76698.5	67863.2	65127.4	61573.4	199464	206045	172390	104270	106605	104895	179436	190375	177355	127178	136809	128358
Gluconate	273063	352977	301063	445910	314505	325124	1.16735e+06	991921	318245	205241	181689	199565	909003	912455	784160	526028	505739	585453	917557	963878	932743	686607	674353	618294
Glucosamine	1539.52	1661.74	2246.15	2455.89	1343.56	1376.58	901.38	816.519	766.314	784.094	1293.19	938.371	776.801	606.697	565.278	576.556	579.688	694.032	646.762	472.792	479.416	547.246	950.036	1148.42
Glucosamine-phosphate	5312.53	7398.42	5143.5	9200.97	7970.59	7825.88	27054.1	26053.8	7490.65	6815.91	9719.28	8755.29	21541.8	19997.2	18112.7	7794.33	7554.71	9739.36	19159.3	19470.9	18201.9	11743.9	16150.2	18448
Glutamate	1.35537e+06	1.94851e+06	1.41889e+06	3.44998e+06	2.85423e+06	3.05561e+06	1.39374e+06	1.19844e+06	1.26579e+06	2.0281e+06	1.74701e+06	1.97308e+06	1.44825e+06	1.44005e+06	1.22249e+06	2.65927e+06	2.5094e+06	2.78339e+06	1.34845e+06	1.35306e+06	1.33057e+06	2.73999e+06	3.59829e+06	2.95363e+06
Glutamine	1469.07	1372.36	1347.03	1904.68	1692.22	1923.69	845.041	1024.44	912.158	2299.38	1502.69	1514.23	906.443	902.028	991.2	950.557	940.991	1176.08	989.059	840.066	982.021	901.253	1943.95	1448.45
Glycerol-3-phosphate	23927.3	25219.7	26398.9	40929.1	31429	32354.7	110150	93462.4	25104.1	18854.2	19388.5	22255.2	103242	101175	93342.9	49106.5	48491.3	54860.7	127013	121434	116266	70494.6	81995.3	81933.7
Glycine	388070	509177	442577	878550	664136	665093	980209	863194	418885	394064	387508	397101	780982	797485	692530	788670	790221	857419	876692	856574	863152	978723	1.14967e+06	1.06132e+06
GMP	10725	10615	10491.3	13362.5	10948.8	10032.8	75555.9	67550.5	8838.78	4465.92	5666.86	4290.44	52068	51457.3	48023.1	10663.9	9489.55	8178.52	66644.9	65427.4	64147.6	8309.77	8252.51	7600.55
GSH	996241	1.369e+06	973579	1.86597e+06	1.64037e+06	1.69344e+06	1.30024e+06	1.3084e+06	1.0197e+06	967873	986046	941136	1.06634e+06	1.24937e+06	1.03102e+06	1.60324e+06	1.50479e+06	1.64989e+06	1.17824e+06	973661	1.09971e+06	1.71536e+06	169686	1.46601e+06
GSSG	2199.92	2616.85	3479.92	2012.88	2784.2	2723.53	1592.14	1402	1704.28	2305.73	1882.09	1901.69	1915.82	1635.35	1579.63	1928.87	2045.76	2099.97	1398.67	1601.45	1452.35	1628.42	5720.14	2655.89
GTP	2167.95	2281.7	3290.35	1890.28	2541.85	2706.26	2308.37	2349.87	2013.65	2068.53	1963.53	1723.28	1991.52	2073.19	1883.82	2746.05	3001.1	3164.9	1537.53	1397.09	1485.06	2739.73	3399.87	3278.92
Guanine	323.958	324.262	582.024	401.53	471.415	484.364	4832.69	4730.72	519.132	436.551	481.227	372.824	4103.78	3678.23	4176.95	348.516	366.156	399.104	5588.97	4604.9	4985.91	426.13	505.699	628.779
Guanosine	5785.37	9872.43	12613.3	21925.8	15845.7	12975.5	231876	210599	18723.4	10782.5	18047	10962.7	166992	149685	153016	6840.4	7155.04	6822.85	226907	211577	205186	9020.43	6567.91	7563.81
Hexosephosphate	213946	261162	219223	432863	370437	351137	809887	751748	264646	253218	238848	247351	578951	604255	571155	273910	264677	279403	656759	701729	662899	332267	387685	356205
Histidine	811278	1.06329e+06	958611	2.26832e+06	1.61306e+06	1.68622e+06	2.30888e+06	1.96616e+06	937994	908440	910201	957388	1.946e+06	2.00791e+06	1.77703e+06	1.79028e+06	1.79728e+06	1.93971e+06	2.23023e+06	2.20504e+06	2.19563e+06	2.30568e+06	2.58202e+06	2.42521e+06
Homocysteine	0	0	0.761247	0.513817	0	0.00200234	0.130009	0.366303	0	0.736884	0.454992	0	0	2.07866	3.7127	3.5395	5.11252	4.51577	3.02765	1.61181	7.91953	8.54863	6.45839	6.63784
Homoserine	1.78117e+06	2.18968e+06	1.89766e+06	4.07315e+06	3.12806e+06	3.075e+06	3.02205e+06	2.62326e+06	1.6019e+06	1.73217e+06	1.70761e+06	1.79037e+06	2.61773e+06	2.74309e+06	2.32708e+06	3.13999e+06	3.08117e+06	3.40494e+06	2.80265e+06	2.86988e+06	2.77401e+06	3.72091e+06	4.42316e+06	4.02392e+06
Hydroxybutyrate	31668.7	44946	43499.8	109082	54007.3	59248.4	78874.8	61854.8	32871.3	40082.3	32787	37492.4	66058.3	63735.1	50421.3	62094	66305.7	67435.5	73334.4	65960.8	61284	76311.1	116753	85152.5
Hypoxanthine	360.346	515.264	933.355	964.871	552.487	751.298	1072.15	888.068	450.173	973.53	966.149	1376.06	1303.16	1104.41	1410.13	474.874	435.396	588.134	2349.52	1794.35	2343.79	552.298	1136.49	811.642
IMP	245.577	559.896	208.438	3218.67	1127.77	1239.65	100.337	182.276	365.258	2369.09	2341.71	3918.72	108.69	140.41	118.634	185.613	351.341	602.231	723.676	655.723	1309.47	116.12	1156	735.856
Inosine	72630.5	135318	109425	432287	117939	129140	195054	144261	76981.9	100792	101002	139970	173655	147546	151425	100759	117564	133361	258926	223194	228349	170980	235849	173763
Lactate	4.45246e+06	6.33848e+06	6.06875e+06	1.60237e+07	7.50339e+06	7.4051e+06	1.35814e+07	9.84629e+06	4.65548e+06	4.62686e+06	4.17802e+06	4.91588e+06	1.17889e+07	1.17759e+07	8.65071e+06	8.51308e+06	9.10505e+06	1.04469e+07	1.5342e+07	1.3611e+07	1.24842e+07	1.60828e+07	1.91076e+07	1.62567e+07
Lysine	133643	185606	174020	547568	283573	273120	507546	397924	133100	154553	156188	163302	417486	423784	366745	333880	354844	387529	488883	468209	456648	454257	533825	484048
Malate	445714	531482	351792	886943	646426	644791	243523	192343	219498	327876	296947	308285	195246	178924	155158	335759	317510	344515	196235	162197	154457	367830	632427	397370
Methionine	290417	350568	298743	663817	487079	508640	643018	584274	284144	276263	280222	286681	532966	563267	496616	523655	524270	551879	600889	602690	599454	625965	664164	673848
Mevalonate	26551.1	46708.5	38038.3	110208	43583.8	35107.9	50142.9	36559.7	23210.9	22871.2	19746.5	23790	42371.4	39068.7	33177.4	35532	57414	37518.1	64030.7	52813.7	48604	34598.7	71930.9	45959.8
myo-Inositol	6.24741e+06	9.92774e+06	8.55048e+06	2.40685e+07	1.12331e+07	1.12781e+07	1.10451e+07	9.26957e+06	5.93005e+06	6.53272e+06	6.13024e+06	6.82436e+06	9.11909e+06	8.7104e+06	7.6471e+06	7.65662e+06	8.04493e+06	8.30627e+06	1.04702e+07	9.65757e+06	9.56082e+06	1.01604e+07	1.10043e+07	1.03479e+07
N-Acetylneuraminic acid	17247.4	22654.2	20614.6	48045.4	27374.7	27504.2	29897.2	26078.2	14479.6	18390	16677.2	16633.3	25461.2	23532.8	21202.9	25019	24382.1	28910.1	27631.1	26534.2	28376	32927.4	32273.2	34457.2
N-Acetylornithine	1659.85	2524.81	2000.88	5355.75	3177.22	3756.28	5713.3	5432.66	1871.16	2371.98	2261.62	2146.44	3885.54	4766.24	3955.33	4263.54	3910.05	4705.22	4463.27	5497.38	5289.69	6065.85	6441.65	5831.48
NAD+	1635.29	1764.75	2374.09	1626.25	2316.63	2303.09	1885.51	1896.95	1333.67	1620.39	1481.22	1389.64	2332.93	2359.63	2312.79	2094.32	2235.45	2566.17	1992.21	1798.67	1969.29	1819.04	3018.62	2471.28
NADH	34.0187	32.242	54.1351	19.7156	22.8675	34.7634	248.738	233.634	36.6625	23.4331	28.3563	24.2903	235.274	264.627	227.434	74.0874	88.4886	92.5563	215.597	175.145	215.117	84.2545	93.2378	115.077
NADP+	17.1161	21.4414	38.9338	22.503	29.9638	32.0607	25.7423	14.6467	25.6523	18.727	16.7519	16.8838	10.0445	30.6761	22.5765	27.3576	45.6671	60.6368	19.5501	23.148	23.6108	53.5722	66.5752	51.6915
NADPH	5.89434	3.24928	0	3.53398	2.87192	4.57655	1.00915	2.41328	8.70834	8.34486	7.20593	5.81426	0	1.29958	0	3.99722	1.56641	0	1.32532	0	0	1.50462	12.8941	8.40844
Nicotinamide	9315.65	10987.3	15362.9	13627.3	11799.1	11993.6	10408	9495.18	7190.81	7790.2	7889.26	7357.25	12899.1	12077.8	11696.7	10270.1	10797.6	13435.3	12385.1	10116.5	11880.4	11097	13765	11754.9
Nicotinate	9.12143	8.10492	22.6873	11.2686	13.3623	12.8209	7.12798	8.36659	6.5158	15.8699	11.1189	8.49524	5.06991	5.65884	10.6262	13.7712	15.1969	17.6283	6.51516	5.35291	5.5031	15.1253	12.5106	7.7244
Ornithine	1042.94	1041.61	1612.08	4397.02	4810.18	4650.87	1397.54	1484.84	947.069	3418.5	3458.1	2956.81	1516.33	1439.56	1498.32	3484.8	3237.48	3847.5	1572.29	1271.14	1472.63	3386.27	4098.19	4459.43
Orotate	0	124.366	1064.5	427.52	450.639	319.834	424.799	192.118	358.184	159.446	2144.97	410.397	65.6221	485.178	431.655	56.6445	76.8073	531.443	84.1803	527.271	644.362	131.993	2300.18	65.1912
Oxaloacetate	1282.93	1023.78	313.077	4633.48	2517.36	2393.92	250.159	288.381	917.403	3280.2	2979.49	2616.75	341.693	112.598	777.351	1636.95	2334.07	1482.91	609.923	850.858	1235.86	1872.09	1639.98	2287.34
Pantothenate	212345	275090	233018	593864	408220	451587	240654	207888	204957	293780	255721	302241	223811	228211	189827	264444	270228	281413	248769	234167	232125	324860	293333	299762
Pentose-5-phosphate	50486	74366.6	65437.4	89418.9	73931.8	56640.4	102202	97300.2	47078.7	42507.8	37319.1	38522.7	80970.5	80355.6	78693	33869.1	33211.6	30859.4	84312.3	95721.4	94886.5	36879.6	34097.9	32798.1
Phenylalanine	1.19878e+06	1.45397e+06	1.27782e+06	2.83073e+06	2.06833e+06	2.09312e+06	2.5751e+06	2.25221e+06	1.1305e+06	1.1706e+06	1.1966e+06	1.20241e+06	2.16369e+06	2.1977e+06	1.93595e+06	2.07771e+06	2.11765e+06	2.25051e+06	2.31204e+06	2.32366e+06	2.29442e+06	2.4492e+06	2.77343e+06	2.6968e+06
Phenylpyruvate	117735	148360	128625	227951	175151	154420	145837	131750	90329.4	93962	90175.9	88484.2	124244	116080	106823	100129	106723	99059	124158	116854	116866	110544	142265	124849
Phosphoenolpyruvate	39458	55254.2	47040.4	82600	61722.1	65115.1	57425	52173.4	41283.7	37021.2	36859.7	38525	44392.8	44307.6	37027.8	42621.7	37850.2	30662.1	39989.5	34884.1	38199.6	37582.4	69736.1	58789.9
Phosphoserine	152.143	850.764	148.669	469.908	1436.62	1715.99	31.4118	90.8982	215.287	1265.44	841.537	883.338	121.99	75.6914	121.896	35.2263	32.3171	84.6373	34.4659	0	30.2651	227.589	399.476	140.895
Proline	517796	670676	576719	1.38249e+06	1.03072e+06	1.0456e+06	1.74437e+06	1.49246e+06	539051	597409	584710	591289	1.59739e+06	1.61548e+06	1.36387e+06	1.80407e+06	1.79934e+06	2.02329e+06	1.65462e+06	1.6214e+06	1.57887e+06	2.12006e+06	2.57077e+06	2.19923e+06
PRPP	634.249	2274.77	855.048	0	84.0762	72.8862	137.647	52.2898	770.637	33.5045	45.9505	58.0628	0	99.6356	80.9516	69.511	44.8186	151.794	83.8843	35.2655	32.4188	0	145.096	73.1096
Pyridoxine	215024	337562	288945	851543	340098	348024	455608	401062	202796	198235	179590	204309	387810	359448	317426	310524	330431	329990	408328	371461	354684	334660	368642	345611
Pyruvate	640699	997163	794859	2.15728e+06	1.01499e+06	895293	906406	740175	455096	451064	453390	466196	672762	631381	541380	555411	619175	609175	725160	591173	590734	667931	1.22424e+06	748674
S-Adenosylhomocysteine	60.8749	397.52	385.954	333.807	387.952	365.65	1052.63	1511.44	659.231	486.446	193.641	151.959	586.683	617.314	683.043	510.395	1209.43	1524.53	1068.85	940.069	833.203	2409.53	102.288	990.772
S-Adenosylmethionine	310.543	315.951	457.682	297.891	462.224	445.206	474.064	451.651	297.624	476.674	408.596	355.449	490.536	498.952	521.485	392.943	288.08	395.518	453.235	432.544	494.794	420.344	439.502	439.554
Serine	114867	188079	130436	367039	296354	321762	28685.6	24281.3	131490	213443	192698	214601	23813.4	24905.5	21314.4	28093.7	27922.2	28462.9	28288.5	29027.1	27629.3	34917.1	45891.2	39340.9
Spermidine	0.114056	0.752716	0.700842	0.184693	0.326276	1.63951	1.35679	1.81662	0	0.270317	0.0936648	0.363569	3.13048	0.358275	0.419711	0.307942	2.2751	1.7209	1.50633	1.63731	1.37515	0.741748	1.50256	0.395819
Succinate	196324	258286	216646	424266	298353	267800	240160	226874	163107	173125	157332	164338	200754	181994	172361	171918	182993	170244	206007	188743	182560	193219	305912	218241
Taurine	1.18575e+06	1.51966e+06	1.2794e+06	1.95765e+06	1.48826e+06	1.5969e+06	3.08043e+06	2.78958e+06	1.20661e+06	901963	807064	889196	2.52769e+06	2.44426e+06	2.07006e+06	1.9772e+06	1.97235e+06	2.15819e+06	2.72163e+06	2.75177e+06	2.60509e+06	2.53256e+06	2.73518e+06	2.30355e+06
Thiamine (+)	42.7333	45.1352	62.0666	86.0225	52.5589	139.156	886.28	471.436	34.5467	40.8641	54.7339	125.068	826.759	347.641	369.417	569.153	916.4	833.096	543.114	588.532	286.372	496.866	769.629	298.127
Thiamine pyrophosphate (+)	54.3288	0	0	0	0	112.24	417.31	265.06	111.824	185.427	91.3726	105.048	272.389	329.498	312.336	168.473	308.109	117.125	332.533	260.231	229.038	40.7353	103.484	147.375
Threonine	1.76805e+06	2.16959e+06	1.88049e+06	4.0344e+06	3.09122e+06	3.03871e+06	2.98663e+06	2.5857e+06	1.57723e+06	1.70587e+06	1.68316e+06	1.76581e+06	2.58467e+06	2.70667e+06	2.29273e+06	3.0968e+06	3.04012e+06	3.35666e+06	2.75663e+06	2.8254e+06	2.72374e+06	3.66074e+06	4.35929e+06	3.96477e+06
Thymidine	28321.2	43871.5	35600	88344.8	48678.6	50237.4	60914.6	52649.2	28669.1	29569.4	27015.8	30861	45713.6	42399	38769.6	37642	37961.8	41415	53165.3	50063.7	50536.5	52373.4	54275.4	52248.3
Thymine	61.9099	53.4249	83.7478	54.3779	66.0848	80.9184	181.164	182.805	57.9849	65.2817	57.6802	59.7843	190.204	182.04	205.691	184.884	180.258	209.856	202.709	196.344	195.888	197.517	339.643	245.526
Tryptophan	122837	144591	128433	307315	222162	246988	73926.4	70403.5	93442.5	108829	114640	116515	268442	280048	249011	270750	271450	307197	101147	114877	111528	149323	152794	168613
TTP	374.289	1434.54	1377.55	1712.24	1185.93	2445.2	181.975	99.4285	2224.45	1601.14	2060.12	2189.74	0	620.431	340.461	4938.96	7956.65	8663.74	309.484	530.145	293.288	5673.91	7380.52	8710.31
Tyrosine	534076	623771	538988	1.25867e+06	931276	1.0255e+06	1.37857e+06	1.15922e+06	546309	583313	585722	610895	1.14947e+06	1.19828e+06	1.05695e+06	1.16359e+06	1.17785e+06	1.33187e+06	1.22995e+06	1.27296e+06	1.26003e+06	1.44584e+06	1.55706e+06	1.51633e+06
UDP	301263	402635	366138	442528	325223	309837	520983	483582	238893	196562	187156	178816	473446	474883	389484	213699	209638	193997	378356	398302	383609	233624	264834	239584
UDP-Glc	259314	345111	289133	430177	327363	344112	333806	283073	251439	206009	210554	214580	315846	337014	280432	247981	259670	271860	313336	319128	313778	312334	352277	313968
UDP-GlcNAc	577125	719745	631879	1.06104e+06	791603	791092	1.54957e+06	1.16861e+06	508329	479958	480260	444969	1.25788e+06	1.27468e+06	666512	1.13631e+06	1.17151e+06	1.26465e+06	1.32855e+06	1.3105e+06	1.25786e+06	1.27786e+06	1.40449e+06	1.22591e+06
UDP-Glucuronate	36302.6	53488.4	39293.5	33772.1	27725.5	33905.6	89387.9	76614.9	38261.1	21132.4	22563.4	23434.4	86293.8	93364.2	69580.8	43234.7	43853.3	52235.2	66136.6	69057.3	70390	48737.8	56036.1	48657.2
UMP	62440.7	73689.1	82400.5	110164	70829	66187	308226	271054	56132.3	42374.3	42541.8	40697.1	326000	301922	265576	29380.8	25297.8	22647.9	350199	363201	340817	29924.9	64668.3	32203
Uracil	98956.3	131788	121655	201918	170665	166772	121115	120244	98740.5	119682	135615	100487	106890	99616.9	96879.2	101310	98832	78737.6	85199.7	86958.7	91334.6	71482.6	86428.2	78384.4
Uric acid	642.852	774.917	875.028	1307.71	1454.33	1410.18	1775.3	953.464	533.119	387.414	2068.07	684.275	2363.1	3022.7	1510.16	2190.18	4451.07	3670.29	3102.56	2490.88	2609.18	4472.12	2067.38	4389.87
Uridine	71242.7	100183	93115.8	214407	106116	109155	296291	237212	67408.9	57896.1	52223.3	63816.2	269706	258973	216762	140545	149802	177488	312309	285682	275648	208465	227981	229852
UTP	1244.39	1434.59	1836.04	653.265	913.031	981.922	482.825	529.024	1109.3	734.568	691.906	629.083	498.841	527.932	470.355	754.867	775.776	864.39	334.709	328.616	341.993	722.28	966.999	861.567
Valine	67602.9	68141	97650.1	64702.9	83299.8	83218.9	67356.9	69297.8	59325	65286.5	63592.8	54079.2	65396.7	63776.3	64354.4	67028.7	68155.7	74921.4	63514.9	54733.3	62832.6	63282.6	83197.7	79195.4
Xanthine	79281	134788	116933	411485	145829	153384	252239	182209	73857.3	72550.5	71320.5	86634.7	201652	189228	143243	136012	145226	167230	248491	213498	200331	233086	288138	255503
Xanthosine	6501.46	10899.9	9921.3	20917	7633.45	7455.91	27555	22518.5	8442.39	3496.86	6143.44	4841.71	21697.3	21500.5	17116	8584.61	8897.26	10510.7	21760.6	21617	19965.8	10774.3	13214.5	12215

## Sheet: PA Ctrl vs Infected
SampleID	Control_1	Control_2	Control_3	Infected_1	Infected_2	Infected_3
Group	Control	Control	Control	Infected	Infected	Infected	ttest
C00123	3.15306e+06	3.9897e+06	3.47522e+06	7.71366e+06	5.61432e+06	5.64821e+06	0.0444925
C00197	90597.8	114420	92216.6	166267	128866	140578	0.0317335
C03232	326.701	732.115	751.495	800.383	490.489	1074.58	0.446001
C00026	18344.9	25533.7	17409.2	41462.8	26368.6	29735.2	0.100402
C00164	395367	638552	544512	1.55215e+06	711631	708444	0.235759
C00417	84578.4	140821	95156.5	285933	197808	226777	0.018631
C00147	174159	206552	164630	281302	216694	194359	0.192778
C00212	2819.06	4192.14	3932.42	7047.35	4833.59	4580.67	0.128532
C00008	324046	392613	353174	660453	508754	474588	0.0657683
C00041	354003	479210	399100	905610	712178	736681	0.010584
C00020	53428	62368.6	62550.3	99276.5	64775.3	51426.5	0.478697
C00062	54719.8	75486.2	70547.9	945.736	0	170.368	0.00863236
C00152	4050.33	6722.28	5806.76	44379.4	38385.5	39603.3	0.000699572
C00049	202964	305668	203760	726450	663928	693124	0.00121483
C00002	445811	619901	482182	1.03396e+06	882196	879191	0.00486228
C00120	6.85769	4.39487	1.76082	6.36391	2.21745	4.50972	0.989795
C00575	1.6865	2.53895	4.99183	1.43566	3.58919	4.80321	0.891166
C00438	8677.23	13618	9212.07	17691.8	11866.6	15957.4	0.116337
C00318	6004.92	7498.99	8735.13	11379	14818.7	19113.6	0.0620334
C00112	49096.2	66404.4	61397.4	85439.7	63823.8	62026.8	0.28506
C00114	2175.5	2617.18	3863.1	4863.18	3034.6	3450.85	0.297589
C00158	3.76518e+06	6.05837e+06	4.30252e+06	1.23182e+07	8.18027e+06	9.32957e+06	0.0315881
C00327	3194.95	3985.2	3261.02	38068.5	27020	27066.5	0.0173462
C00055	1128.4	1675.97	2696.94	3317.08	1635.12	2022.66	0.513622
C00063	75890.3	105168	87038	118637	95439.7	91936.6	0.350128
C00542	86838	120559	103376	283483	241677	243523	0.00127144
C00097	127.627	150.371	74.2994	67.73	422.278	330.201	0.277663
C00475	1.19674e+06	1.56118e+06	1.28236e+06	2.17476e+06	1.73316e+06	1.69688e+06	0.0567393
C00380	172048	176035	195499	205490	200928	218419	0.0438081
C00360	143.187	312.939	273.291	877.752	374.424	527.38	0.131946
C00239	11249.6	15949.3	10898	22604.5	17768.3	18907.6	0.0325531
C00559	201.081	174.207	196.607	420.852	153.339	170.223	0.575068
C00330	2819.06	4248.19	4082.96	7396.33	4906.06	4580.67	0.152252
C05512	209.799	357.103	332.662	1880.65	712.383	1425.65	0.0898223
C16637	16997.1	22724.5	20815.3	50942	27959.1	22528.7	0.255709
C00526	3594.73	6314.12	6103.86	10677.2	7533.56	9663.26	0.0362049
C00362	53428	62368.6	62550.3	99276.5	64775.3	51426.5	0.478697
C00286	445811	619901	482182	1.03396e+06	882196	879191	0.00486228
C00337	9168.87	11844.4	11156.7	13526.3	13202.6	12909.3	0.0836328
C00111	370886	490258	444157	665185	550188	476733	0.130794
C00363	584.772	425.887	1268.85	4646.54	1929.84	2456.67	0.102904
C00364	52.3226	185.426	521.644	1617.4	1217.38	893.061	0.0222287
C00279	25024.5	32561.4	35942.2	48315.1	43786.3	38334.6	0.0474453
C00016	428.845	477.652	318.127	708.791	153.87	353.83	0.988465
C00354	416830	602832	631850	1.01132e+06	807394	751727	0.0431531
C00122	33398.9	40022.3	32061.7	65521.6	51121.9	52814.4	0.0245204
C00035	84251.6	105161	103378	151469	114559	107683	0.175758
C00257	273063	352977	301063	445910	314505	325124	0.350435
C00329	1539.52	1661.74	2246.15	2455.89	1343.56	1376.58	0.84424
C00352	5312.53	7398.42	5143.5	9200.97	7970.59	7825.88	0.0605086
C00025	1.35537e+06	1.94851e+06	1.41889e+06	3.44998e+06	2.85423e+06	3.05561e+06	0.0039035
C00064	1469.07	1372.36	1347.03	1904.68	1692.22	1923.69	0.0133841
C00093	23927.3	25219.7	26398.9	40929.1	31429	32354.7	0.0775609
C00037	388070	509177	442577	878550	664136	665093	0.0375081
C00144	10725	10615	10491.3	13362.5	10948.8	10032.8	0.487957
C00051	996241	1.369e+06	973579	1.86597e+06	1.64037e+06	1.69344e+06	0.0228236
C00127	2199.92	2616.85	3479.92	2012.88	2784.2	2723.53	0.601457
C00044	2167.95	2281.7	3290.35	1890.28	2541.85	2706.26	0.671483
C00242	323.958	324.262	582.024	401.53	471.415	484.364	0.677119
C00387	5785.37	9872.43	12613.3	21925.8	15845.7	12975.5	0.0909154
C02965	213946	261162	219223	432863	370437	351137	0.0101983
C00135	811278	1.06329e+06	958611	2.26832e+06	1.61306e+06	1.68622e+06	0.0362608
C05330	0	0	0.761247	0.513817	0	0.00200234	0.80415
C00263	1.78117e+06	2.18968e+06	1.89766e+06	4.07315e+06	3.12806e+06	3.075e+06	0.0328853
C01089	31668.7	44946	43499.8	109082	54007.3	59248.4	0.186407
C00262	360.346	515.264	933.355	964.871	552.487	751.298	0.507698
C00130	245.577	559.896	208.438	3218.67	1127.77	1239.65	0.150666
C00294	72630.5	135318	109425	432287	117939	129140	0.361766
C00186	4.45246e+06	6.33848e+06	6.06875e+06	1.60237e+07	7.50339e+06	7.4051e+06	0.239363
C00047	133643	185606	174020	547568	283573	273120	0.147678
C00149	445714	531482	351792	886943	646426	644791	0.0507172
C00073	290417	350568	298743	663817	487079	508640	0.0386104
C00418	26551.1	46708.5	38038.3	110208	43583.8	35107.9	0.390704
C00137	6.24741e+06	9.92774e+06	8.55048e+06	2.40685e+07	1.12331e+07	1.12781e+07	0.225888
C00270	17247.4	22654.2	20614.6	48045.4	27374.7	27504.2	0.170448
C00437	1659.85	2524.81	2000.88	5355.75	3177.22	3756.28	0.0741081
C00003	1635.29	1764.75	2374.09	1626.25	2316.63	2303.09	0.651007
C00004	34.0187	32.242	54.1351	19.7156	22.8675	34.7634	0.173596
C00006	17.1161	21.4414	38.9338	22.503	29.9638	32.0607	0.770178
C00005	5.89434	3.24928	0	3.53398	2.87192	4.57655	0.758549
C00153	9315.65	10987.3	15362.9	13627.3	11799.1	11993.6	0.782224
C00253	9.12143	8.10492	22.6873	11.2686	13.3623	12.8209	0.878058
C00077	1042.94	1041.61	1612.08	4397.02	4810.18	4650.87	0.000321754
C00295	0	124.366	1064.5	427.52	450.639	319.834	0.993623
C00036	1282.93	1023.78	313.077	4633.48	2517.36	2393.92	0.0709286
C00864	212345	275090	233018	593864	408220	451587	0.0380793
C00079	1.19878e+06	1.45397e+06	1.27782e+06	2.83073e+06	2.06833e+06	2.09312e+06	0.045361
C00166	117735	148360	128625	227951	175151	154420	0.117041
C00074	39458	55254.2	47040.4	82600	61722.1	65115.1	0.052577
C01005	152.143	850.764	148.669	469.908	1436.62	1715.99	0.151225
C00148	517796	670676	576719	1.38249e+06	1.03072e+06	1.0456e+06	0.0267048
C00119	634.249	2274.77	855.048	0	84.0762	72.8862	0.14388
C00314	215024	337562	288945	851543	340098	348024	0.301301
C00022	640699	997163	794859	2.15728e+06	1.01499e+06	895293	0.306684
C00021	60.8749	397.52	385.954	333.807	387.952	365.65	0.540252
C00019	310.543	315.951	457.682	297.891	462.224	445.206	0.600168
C00065	114867	188079	130436	367039	296354	321762	0.00382549
C00315	0.114056	0.752716	0.700842	0.184693	0.326276	1.63951	0.728916
C00042	196324	258286	216646	424266	298353	267800	0.144591
C00245	1.18575e+06	1.51966e+06	1.2794e+06	1.95765e+06	1.48826e+06	1.5969e+06	0.119627
C00378	42.7333	45.1352	62.0666	86.0225	52.5589	139.156	0.229183
C00068	54.3288	0	0	0	0	112.24	0.675106
C00188	1.76805e+06	2.16959e+06	1.88049e+06	4.0344e+06	3.09122e+06	3.03871e+06	0.0340147
C00214	28321.2	43871.5	35600	88344.8	48678.6	50237.4	0.168461
C00178	61.9099	53.4249	83.7478	54.3779	66.0848	80.9184	0.951649
C00078	122837	144591	128433	307315	222162	246988	0.0309256
C00459	374.289	1434.54	1377.55	1712.24	1185.93	2445.2	0.225484
C00082	534076	623771	538988	1.25867e+06	931276	1.0255e+06	0.0269387
C00015	301263	402635	366138	442528	325223	309837	0.963485
C00029	259314	345111	289133	430177	327363	344112	0.166412
C00043	577125	719745	631879	1.06104e+06	791603	791092	0.100902
C00167	36302.6	53488.4	39293.5	33772.1	27725.5	33905.6	0.157302
C00105	62440.7	73689.1	82400.5	110164	70829	66187	0.577097
C00106	98956.3	131788	121655	201918	170665	166772	0.013991
C00366	642.852	774.917	875.028	1307.71	1454.33	1410.18	0.00267335
C00299	71242.7	100183	93115.8	214407	106116	109155	0.259072
C00075	1244.39	1434.59	1836.04	653.265	913.031	981.922	0.0431668
C00183	67602.9	68141	97650.1	64702.9	83299.8	83218.9	0.954144
C00385	79281	134788	116933	411485	145829	153384	0.282615
C01762	6501.46	10899.9	9921.3	20917	7633.45	7455.91	0.588796

## Sheet: PA Ctrl vs Infected_signonly
SampleID	Control_1	Control_2	Control_3	Infected_1	Infected_2	Infected_3
Group	Control	Control	Control	Infected	Infected	Infected	ttest
C00077	1042.94	1041.61	1612.08	4397.02	4810.18	4650.87	0.000321754
C00152	4050.33	6722.28	5806.76	44379.4	38385.5	39603.3	0.000699572
C00049	202964	305668	203760	726450	663928	693124	0.00121483
C00542	86838	120559	103376	283483	241677	243523	0.00127144
C00366	642.852	774.917	875.028	1307.71	1454.33	1410.18	0.00267335
C00065	114867	188079	130436	367039	296354	321762	0.00382549
C00025	1.35537e+06	1.94851e+06	1.41889e+06	3.44998e+06	2.85423e+06	3.05561e+06	0.0039035
C00002	445811	619901	482182	1.03396e+06	882196	879191	0.00486228
C00286	445811	619901	482182	1.03396e+06	882196	879191	0.00486228
C00062	54719.8	75486.2	70547.9	945.736	0	170.368	0.00863236
C02965	213946	261162	219223	432863	370437	351137	0.0101983
C00041	354003	479210	399100	905610	712178	736681	0.010584
C00064	1469.07	1372.36	1347.03	1904.68	1692.22	1923.69	0.0133841
C00106	98956.3	131788	121655	201918	170665	166772	0.013991
C00327	3194.95	3985.2	3261.02	38068.5	27020	27066.5	0.0173462
C00417	84578.4	140821	95156.5	285933	197808	226777	0.018631
C00364	52.3226	185.426	521.644	1617.4	1217.38	893.061	0.0222287
C00051	996241	1.369e+06	973579	1.86597e+06	1.64037e+06	1.69344e+06	0.0228236
C00122	33398.9	40022.3	32061.7	65521.6	51121.9	52814.4	0.0245204
C00148	517796	670676	576719	1.38249e+06	1.03072e+06	1.0456e+06	0.0267048
C00082	534076	623771	538988	1.25867e+06	931276	1.0255e+06	0.0269387
C00078	122837	144591	128433	307315	222162	246988	0.0309256
C00158	3.76518e+06	6.05837e+06	4.30252e+06	1.23182e+07	8.18027e+06	9.32957e+06	0.0315881
C00197	90597.8	114420	92216.6	166267	128866	140578	0.0317335
C00239	11249.6	15949.3	10898	22604.5	17768.3	18907.6	0.0325531
C00263	1.78117e+06	2.18968e+06	1.89766e+06	4.07315e+06	3.12806e+06	3.075e+06	0.0328853
C00188	1.76805e+06	2.16959e+06	1.88049e+06	4.0344e+06	3.09122e+06	3.03871e+06	0.0340147
C00526	3594.73	6314.12	6103.86	10677.2	7533.56	9663.26	0.0362049
C00135	811278	1.06329e+06	958611	2.26832e+06	1.61306e+06	1.68622e+06	0.0362608
C00037	388070	509177	442577	878550	664136	665093	0.0375081
C00864	212345	275090	233018	593864	408220	451587	0.0380793
C00073	290417	350568	298743	663817	487079	508640	0.0386104
C00354	416830	602832	631850	1.01132e+06	807394	751727	0.0431531
C00075	1244.39	1434.59	1836.04	653.265	913.031	981.922	0.0431668
C00380	172048	176035	195499	205490	200928	218419	0.0438081
C00123	3.15306e+06	3.9897e+06	3.47522e+06	7.71366e+06	5.61432e+06	5.64821e+06	0.0444925
C00079	1.19878e+06	1.45397e+06	1.27782e+06	2.83073e+06	2.06833e+06	2.09312e+06	0.045361
C00279	25024.5	32561.4	35942.2	48315.1	43786.3	38334.6	0.0474453
C00149	445714	531482	351792	886943	646426	644791	0.0507172
C00074	39458	55254.2	47040.4	82600	61722.1	65115.1	0.052577
C00475	1.19674e+06	1.56118e+06	1.28236e+06	2.17476e+06	1.73316e+06	1.69688e+06	0.0567393
C00352	5312.53	7398.42	5143.5	9200.97	7970.59	7825.88	0.0605086
C00318	6004.92	7498.99	8735.13	11379	14818.7	19113.6	0.0620334
C00008	324046	392613	353174	660453	508754	474588	0.0657683
C00036	1282.93	1023.78	313.077	4633.48	2517.36	2393.92	0.0709286
C00437	1659.85	2524.81	2000.88	5355.75	3177.22	3756.28	0.0741081
C00093	23927.3	25219.7	26398.9	40929.1	31429	32354.7	0.0775609
C00337	9168.87	11844.4	11156.7	13526.3	13202.6	12909.3	0.0836328
C05512	209.799	357.103	332.662	1880.65	712.383	1425.65	0.0898223
C00387	5785.37	9872.43	12613.3	21925.8	15845.7	12975.5	0.0909154
C00026	18344.9	25533.7	17409.2	41462.8	26368.6	29735.2	0.100402
C00043	577125	719745	631879	1.06104e+06	791603	791092	0.100902
C00363	584.772	425.887	1268.85	4646.54	1929.84	2456.67	0.102904
C00438	8677.23	13618	9212.07	17691.8	11866.6	15957.4	0.116337
C00166	117735	148360	128625	227951	175151	154420	0.117041
C00245	1.18575e+06	1.51966e+06	1.2794e+06	1.95765e+06	1.48826e+06	1.5969e+06	0.119627
C00212	2819.06	4192.14	3932.42	7047.35	4833.59	4580.67	0.128532
C00111	370886	490258	444157	665185	550188	476733	0.130794
C00360	143.187	312.939	273.291	877.752	374.424	527.38	0.131946
C00119	634.249	2274.77	855.048	0	84.0762	72.8862	0.14388
C00042	196324	258286	216646	424266	298353	267800	0.144591
C00047	133643	185606	174020	547568	283573	273120	0.147678
C00130	245.577	559.896	208.438	3218.67	1127.77	1239.65	0.150666
C01005	152.143	850.764	148.669	469.908	1436.62	1715.99	0.151225
C00330	2819.06	4248.19	4082.96	7396.33	4906.06	4580.67	0.152252
C00167	36302.6	53488.4	39293.5	33772.1	27725.5	33905.6	0.157302
C00029	259314	345111	289133	430177	327363	344112	0.166412
C00214	28321.2	43871.5	35600	88344.8	48678.6	50237.4	0.168461
C00270	17247.4	22654.2	20614.6	48045.4	27374.7	27504.2	0.170448
C00004	34.0187	32.242	54.1351	19.7156	22.8675	34.7634	0.173596
C00035	84251.6	105161	103378	151469	114559	107683	0.175758
C01089	31668.7	44946	43499.8	109082	54007.3	59248.4	0.186407
C00147	174159	206552	164630	281302	216694	194359	0.192778
C00459	374.289	1434.54	1377.55	1712.24	1185.93	2445.2	0.225484
C00137	6.24741e+06	9.92774e+06	8.55048e+06	2.40685e+07	1.12331e+07	1.12781e+07	0.225888
C00378	42.7333	45.1352	62.0666	86.0225	52.5589	139.156	0.229183
C00164	395367	638552	544512	1.55215e+06	711631	708444	0.235759
C00186	4.45246e+06	6.33848e+06	6.06875e+06	1.60237e+07	7.50339e+06	7.4051e+06	0.239363
C16637	16997.1	22724.5	20815.3	50942	27959.1	22528.7	0.255709
C00299	71242.7	100183	93115.8	214407	106116	109155	0.259072
C00097	127.627	150.371	74.2994	67.73	422.278	330.201	0.277663
C00385	79281	134788	116933	411485	145829	153384	0.282615
C00112	49096.2	66404.4	61397.4	85439.7	63823.8	62026.8	0.28506
C00114	2175.5	2617.18	3863.1	4863.18	3034.6	3450.85	0.297589
C00314	215024	337562	288945	851543	340098	348024	0.301301
C00022	640699	997163	794859	2.15728e+06	1.01499e+06	895293	0.306684
C00063	75890.3	105168	87038	118637	95439.7	91936.6	0.350128
C00257	273063	352977	301063	445910	314505	325124	0.350435
C00294	72630.5	135318	109425	432287	117939	129140	0.361766
C00418	26551.1	46708.5	38038.3	110208	43583.8	35107.9	0.390704
C03232	326.701	732.115	751.495	800.383	490.489	1074.58	0.446001
C00020	53428	62368.6	62550.3	99276.5	64775.3	51426.5	0.478697
C00362	53428	62368.6	62550.3	99276.5	64775.3	51426.5	0.478697
C00144	10725	10615	10491.3	13362.5	10948.8	10032.8	0.487957
C00262	360.346	515.264	933.355	964.871	552.487	751.298	0.507698
C00055	1128.4	1675.97	2696.94	3317.08	1635.12	2022.66	0.513622
C00021	60.8749	397.52	385.954	333.807	387.952	365.65	0.540252
C00559	201.081	174.207	196.607	420.852	153.339	170.223	0.575068
C00105	62440.7	73689.1	82400.5	110164	70829	66187	0.577097
C01762	6501.46	10899.9	9921.3	20917	7633.45	7455.91	0.588796
C00019	310.543	315.951	457.682	297.891	462.224	445.206	0.600168
C00127	2199.92	2616.85	3479.92	2012.88	2784.2	2723.53	0.601457
C00003	1635.29	1764.75	2374.09	1626.25	2316.63	2303.09	0.651007
C00044	2167.95	2281.7	3290.35	1890.28	2541.85	2706.26	0.671483
C00068	54.3288	0	0	0	0	112.24	0.675106
C00242	323.958	324.262	582.024	401.53	471.415	484.364	0.677119
C00315	0.114056	0.752716	0.700842	0.184693	0.326276	1.63951	0.728916
C00005	5.89434	3.24928	0	3.53398	2.87192	4.57655	0.758549
C00006	17.1161	21.4414	38.9338	22.503	29.9638	32.0607	0.770178
C00153	9315.65	10987.3	15362.9	13627.3	11799.1	11993.6	0.782224
C05330	0	0	0.761247	0.513817	0	0.00200234	0.80415
C00329	1539.52	1661.74	2246.15	2455.89	1343.56	1376.58	0.84424
C00253	9.12143	8.10492	22.6873	11.2686	13.3623	12.8209	0.878058
C00575	1.6865	2.53895	4.99183	1.43566	3.58919	4.80321	0.891166
C00178	61.9099	53.4249	83.7478	54.3779	66.0848	80.9184	0.951649
C00183	67602.9	68141	97650.1	64702.9	83299.8	83218.9	0.954144
C00015	301263	402635	366138	442528	325223	309837	0.963485
C00016	428.845	477.652	318.127	708.791	153.87	353.83	0.988465
C00120	6.85769	4.39487	1.76082	6.36391	2.21745	4.50972	0.989795
C00295	0	124.366	1064.5	427.52	450.639	319.834	0.993623

## Sheet: PA Infected vs Infected IFN
SampleID	Infected_1	Infected_2	Infected_3	IFN+infected_1	IFN+infected_2	IFN+infected_3
Group	Infected	Infected	Infected	IFN+infected	IFN+infected	IFN+infected
C00123	7.71366e+06	5.61432e+06	5.64821e+06	3.19633e+06	3.23511e+06	3.26933e+06
C00197	166267	128866	140578	74916.1	72805.7	89462
C03232	800.383	490.489	1074.58	1499.63	1188.96	1308.22
C00026	41462.8	26368.6	29735.2	19195.5	15122.5	17276.5
C00164	1.55215e+06	711631	708444	430391	402368	438708
C00417	285933	197808	226777	141405	116664	120761
C00147	281302	216694	194359	95885.9	103387	99617.9
C00212	7047.35	4833.59	4580.67	3617.87	4029.28	4253.05
C00008	660453	508754	474588	273217	275123	258853
C00041	905610	712178	736681	441899	421909	440032
C00020	99276.5	64775.3	51426.5	32837.8	30592.6	25577.5
C00062	945.736	0	170.368	329.972	248.715	16.9194
C00152	44379.4	38385.5	39603.3	24036.1	20348.9	22925
C00049	726450	663928	693124	469578	397590	450756
C00002	1.03396e+06	882196	879191	497565	501865	509267
C00120	6.36391	2.21745	4.50972	3.07541	3.4208	3.48656
C00575	1.43566	3.58919	4.80321	4.38121	1.4211	3.94237
C00438	17691.8	11866.6	15957.4	7245.32	6204.89	6600.07
C00318	11379	14818.7	19113.6	13997.4	11066.5	11395.2
C00112	85439.7	63823.8	62026.8	35753.2	36840.6	36129.2
C00114	4863.18	3034.6	3450.85	3867.44	3392.29	3550.88
C00158	1.23182e+07	8.18027e+06	9.32957e+06	5.369e+06	4.76993e+06	5.22964e+06
C00327	38068.5	27020	27066.5	15886.1	14746	16740.2
C00055	3317.08	1635.12	2022.66	1838.26	1382.04	1434.13
C00063	118637	95439.7	91936.6	55260	54581.9	54803.8
C00542	283483	241677	243523	160962	163030	165963
C00097	67.73	422.278	330.201	374.792	437.398	528.02
C00475	2.17476e+06	1.73316e+06	1.69688e+06	890230	885588	893681
C00380	205490	200928	218419	188052	176190	160806
C00360	877.752	374.424	527.38	328.486	167.262	167.796
C00239	22604.5	17768.3	18907.6	13445.3	13076.8	12670.5
C00559	420.852	153.339	170.223	212.535	182.426	119.402
C00330	7396.33	4906.06	4580.67	3742.81	4075.99	4298.56
C05512	1880.65	712.383	1425.65	640.28	727.269	950.483
C16637	50942	27959.1	22528.7	14289.9	9772.46	13517.2
C00526	10677.2	7533.56	9663.26	5804.11	5993.27	5675.84
C00362	99276.5	64775.3	51426.5	32837.8	30596.1	25577.5
C00286	1.03396e+06	882196	879191	497565	501865	509267
C00337	13526.3	13202.6	12909.3	6682.69	12658.1	6863.4
C00111	665185	550188	476733	278645	268748	264557
C00363	4646.54	1929.84	2456.67	1226.29	1342.44	1403.36
C00364	1617.4	1217.38	893.061	1224.03	978.462	1097.57
C00279	48315.1	43786.3	38334.6	29028	26461.9	25125.3
C00016	708.791	153.87	353.83	319.587	108.353	190.414
C00354	1.01132e+06	807394	751727	550168	522376	474712
C00122	65521.6	51121.9	52814.4	29638.7	27236.6	28442.5
C00035	151469	114559	107683	67863.2	65127.4	61573.4
C00257	445910	314505	325124	205241	181689	199565
C00329	2455.89	1343.56	1376.58	784.094	1293.19	938.371
C00352	9200.97	7970.59	7825.88	6815.91	9719.28	8755.29
C00025	3.44998e+06	2.85423e+06	3.05561e+06	2.0281e+06	1.74701e+06	1.97308e+06
C00064	1904.68	1692.22	1923.69	2299.38	1502.69	1514.23
C00093	40929.1	31429	32354.7	18854.2	19388.5	22255.2
C00037	878550	664136	665093	394064	387508	397101
C00144	13362.5	10948.8	10032.8	4465.92	5666.86	4290.44
C00051	1.86597e+06	1.64037e+06	1.69344e+06	967873	986046	941136
C00127	2012.88	2784.2	2723.53	2305.73	1882.09	1901.69
C00044	1890.28	2541.85	2706.26	2068.53	1963.53	1723.28
C00242	401.53	471.415	484.364	436.551	481.227	372.824
C00387	21925.8	15845.7	12975.5	10782.5	18047	10962.7
C02965	432863	370437	351137	253218	238848	247351
C00135	2.26832e+06	1.61306e+06	1.68622e+06	908440	910201	957388
C05330	0.513817	0	0.00200234	0.736884	0.454992	0
C00263	4.07315e+06	3.12806e+06	3.075e+06	1.73217e+06	1.70761e+06	1.79037e+06
C01089	109082	54007.3	59248.4	40082.3	32787	37492.4
C00262	964.871	552.487	751.298	973.53	966.149	1376.06
C00130	3218.67	1127.77	1239.65	2369.09	2341.71	3918.72
C00294	432287	117939	129140	100792	101002	139970
C00186	1.60237e+07	7.50339e+06	7.4051e+06	4.62686e+06	4.17802e+06	4.91588e+06
C00047	547568	283573	273120	154553	156188	163302
C00149	886943	646426	644791	327876	296947	308285
C00073	663817	487079	508640	276263	280222	286681
C00418	110208	43583.8	35107.9	22871.2	19746.5	23790
C00137	2.40685e+07	1.12331e+07	1.12781e+07	6.53272e+06	6.13024e+06	6.82436e+06
C00270	48045.4	27374.7	27504.2	18390	16677.2	16633.3
C00437	5355.75	3177.22	3756.28	2371.98	2261.62	2146.44
C00003	1626.25	2316.63	2303.09	1620.39	1481.22	1389.64
C00004	19.7156	22.8675	34.7634	23.4331	28.3563	24.2903
C00006	22.503	29.9638	32.0607	18.727	16.7519	16.8838
C00005	3.53398	2.87192	4.57655	8.34486	7.20593	5.81426
C00153	13627.3	11799.1	11993.6	7790.2	7889.26	7357.25
C00253	11.2686	13.3623	12.8209	15.8699	11.1189	8.49524
C00077	4397.02	4810.18	4650.87	3418.5	3458.1	2956.81
C00295	427.52	450.639	319.834	159.446	2144.97	410.397
C00036	4633.48	2517.36	2393.92	3280.2	2979.49	2616.75
C00864	593864	408220	451587	293780	255721	302241
C00079	2.83073e+06	2.06833e+06	2.09312e+06	1.1706e+06	1.1966e+06	1.20241e+06
C00166	227951	175151	154420	93962	90175.9	88484.2
C00074	82600	61722.1	65115.1	37021.2	36859.7	38525
C01005	469.908	1436.62	1715.99	1265.44	841.537	883.338
C00148	1.38249e+06	1.03072e+06	1.0456e+06	597409	584710	591289
C00119	0	84.0762	72.8862	33.5045	45.9505	58.0628
C00314	851543	340098	348024	198235	179590	204309
C00022	2.15728e+06	1.01499e+06	895293	451064	453390	466196
C00021	333.807	387.952	365.65	486.446	193.641	151.959
C00019	297.891	462.224	445.206	476.674	408.596	355.449
C00065	367039	296354	321762	213443	192698	214601
C00315	0.184693	0.326276	1.63951	0.270317	0.0936648	0.363569
C00042	424266	298353	267800	173125	157332	164338
C00245	1.95765e+06	1.48826e+06	1.5969e+06	901963	807064	889196
C00378	86.0225	52.5589	139.156	40.8641	54.7339	125.068
C00068	0	0	112.24	185.427	91.3726	105.048
C00188	4.0344e+06	3.09122e+06	3.03871e+06	1.70587e+06	1.68316e+06	1.76581e+06
C00214	88344.8	48678.6	50237.4	29569.4	27015.8	30861
C00178	54.3779	66.0848	80.9184	65.2817	57.6802	59.7843
C00078	307315	222162	246988	108829	114640	116515
C00459	1712.24	1185.93	2445.2	1601.14	2060.12	2189.74
C00082	1.25867e+06	931276	1.0255e+06	583313	585722	610895
C00015	442528	325223	309837	196562	187156	178816
C00029	430177	327363	344112	206009	210554	214580
C00043	1.06104e+06	791603	791092	479958	480260	444969
C00167	33772.1	27725.5	33905.6	21132.4	22563.4	23434.4
C00105	110164	70829	66187	42374.3	42541.8	40697.1
C00106	201918	170665	166772	119682	135615	100487
C00366	1307.71	1454.33	1410.18	387.414	2068.07	684.275
C00299	214407	106116	109155	57896.1	52223.3	63816.2
C00075	653.265	913.031	981.922	734.568	691.906	629.083
C00183	64702.9	83299.8	83218.9	65286.5	63592.8	54079.2
C00385	411485	145829	153384	72550.5	71320.5	86634.7
C01762	20917	7633.45	7455.91	3496.86	6143.44	4841.71

## Sheet: PA Infected IFN vs Myc OE Infec
SampleID	IFN+infected_1	IFN+infected_2	IFN+infected_3	MYC+IFN+infected_1	MYC+IFN+infected_2	MYC+IFN+infected_3
Group	IFN+infected	IFN+infected	IFN+infected	MYC+IFN+infected	MYC+IFN+infected	MYC+IFN+infected
C00123	3.19633e+06	3.23511e+06	3.26933e+06	5.86033e+06	6.84459e+06	6.47232e+06
C00197	74916.1	72805.7	89462	133565	158882	138624
C03232	1499.63	1188.96	1308.22	1207.14	973.737	1021.12
C00026	19195.5	15122.5	17276.5	39495.4	60636.2	30335.7
C00164	430391	402368	438708	634491	831690	673694
C00417	141405	116664	120761	386198	467428	378719
C00147	95885.9	103387	99617.9	155967	199343	179385
C00212	3617.87	4029.28	4253.05	22363.6	20559.2	20420.5
C00008	273217	275123	258853	364493	412697	380950
C00041	441899	421909	440032	837646	1.00941e+06	931696
C00020	32837.8	30592.6	25577.5	21721.5	25105.7	24081.8
C00062	329.972	248.715	16.9194	1644.29	3664.24	421.403
C00152	24036.1	20348.9	22925	36982	45420.4	40462
C00049	469578	397590	450756	367412	470147	394918
C00002	497565	501865	509267	941806	1.08116e+06	988052
C00120	3.07541	3.4208	3.48656	5.23933	2.94238	6.6775
C00575	4.38121	1.4211	3.94237	11.2281	7.77934	8.18982
C00438	7245.32	6204.89	6600.07	9056.63	13403.3	8991.87
C00318	13997.4	11066.5	11395.2	15036.3	23064.8	17819.3
C00112	35753.2	36840.6	36129.2	57748.1	68683	62361.2
C00114	3867.44	3392.29	3550.88	4883.51	8237.09	7276.42
C00158	5.369e+06	4.76993e+06	5.22964e+06	1.84406e+07	1.93248e+07	1.86e+07
C00327	15886.1	14746	16740.2	37791	36745.9	40056.9
C00055	1838.26	1382.04	1434.13	2913.02	4247.46	3688.68
C00063	55260	54581.9	54803.8	105186	122448	107906
C00542	160962	163030	165963	224689	254695	240748
C00097	374.792	437.398	528.02	4655.29	1910.74	2825.97
C00475	890230	885588	893681	1.7215e+06	1.93299e+06	1.79583e+06
C00380	188052	176190	160806	150560	181831	168818
C00360	328.486	167.262	167.796	221.929	36.7732	327.968
C00239	13445.3	13076.8	12670.5	22816.5	783.179	17790.6
C00559	212.535	182.426	119.402	87.5993	148.484	149.729
C00330	3742.81	4075.99	4298.56	22363.6	20559.2	20432.8
C05512	640.28	727.269	950.483	1527.76	2315.01	3187.25
C16637	14289.9	9772.46	13517.2	11313.5	14900	13424.6
C00526	5804.11	5993.27	5675.84	9885.34	8875.23	7993.32
C00362	32837.8	30596.1	25577.5	21721.5	25105.7	24081.8
C00286	497565	501865	509267	941806	1.08116e+06	988052
C00337	6682.69	12658.1	6863.4	39520.1	37385.5	26348
C00111	278645	268748	264557	553844	600662	547434
C00363	1226.29	1342.44	1403.36	3906.34	4266.59	4340.18
C00364	1224.03	978.462	1097.57	2378.24	3085.51	2088.3
C00279	29028	26461.9	25125.3	51844.6	45530.7	42350.7
C00016	319.587	108.353	190.414	997.089	1636.4	628.719
C00354	550168	522376	474712	804595	748568	703144
C00122	29638.7	27236.6	28442.5	51349.5	108701	49280.1
C00035	67863.2	65127.4	61573.4	127178	136809	128358
C00257	205241	181689	199565	686607	674353	618294
C00329	784.094	1293.19	938.371	547.246	950.036	1148.42
C00352	6815.91	9719.28	8755.29	11743.9	16150.2	18448
C00025	2.0281e+06	1.74701e+06	1.97308e+06	2.73999e+06	3.59829e+06	2.95363e+06
C00064	2299.38	1502.69	1514.23	901.253	1943.95	1448.45
C00093	18854.2	19388.5	22255.2	70494.6	81995.3	81933.7
C00037	394064	387508	397101	978723	1.14967e+06	1.06132e+06
C00144	4465.92	5666.86	4290.44	8309.77	8252.51	7600.55
C00051	967873	986046	941136	1.71536e+06	169686	1.46601e+06
C00127	2305.73	1882.09	1901.69	1628.42	5720.14	2655.89
C00044	2068.53	1963.53	1723.28	2739.73	3399.87	3278.92
C00242	436.551	481.227	372.824	426.13	505.699	628.779
C00387	10782.5	18047	10962.7	9020.43	6567.91	7563.81
C02965	253218	238848	247351	332267	387685	356205
C00135	908440	910201	957388	2.30568e+06	2.58202e+06	2.42521e+06
C05330	0.736884	0.454992	0	8.54863	6.45839	6.63784
C00263	1.73217e+06	1.70761e+06	1.79037e+06	3.72091e+06	4.42316e+06	4.02392e+06
C01089	40082.3	32787	37492.4	76311.1	116753	85152.5
C00262	973.53	966.149	1376.06	552.298	1136.49	811.642
C00130	2369.09	2341.71	3918.72	116.12	1156	735.856
C00294	100792	101002	139970	170980	235849	173763
C00186	4.62686e+06	4.17802e+06	4.91588e+06	1.60828e+07	1.91076e+07	1.62567e+07
C00047	154553	156188	163302	454257	533825	484048
C00149	327876	296947	308285	367830	632427	397370
C00073	276263	280222	286681	625965	664164	673848
C00418	22871.2	19746.5	23790	34598.7	71930.9	45959.8
C00137	6.53272e+06	6.13024e+06	6.82436e+06	1.01604e+07	1.10043e+07	1.03479e+07
C00270	18390	16677.2	16633.3	32927.4	32273.2	34457.2
C00437	2371.98	2261.62	2146.44	6065.85	6441.65	5831.48
C00003	1620.39	1481.22	1389.64	1819.04	3018.62	2471.28
C00004	23.4331	28.3563	24.2903	84.2545	93.2378	115.077
C00006	18.727	16.7519	16.8838	53.5722	66.5752	51.6915
C00005	8.34486	7.20593	5.81426	1.50462	12.8941	8.40844
C00153	7790.2	7889.26	7357.25	11097	13765	11754.9
C00253	15.8699	11.1189	8.49524	15.1253	12.5106	7.7244
C00077	3418.5	3458.1	2956.81	3386.27	4098.19	4459.43
C00295	159.446	2144.97	410.397	131.993	2300.18	65.1912
C00036	3280.2	2979.49	2616.75	1872.09	1639.98	2287.34
C00864	293780	255721	302241	324860	293333	299762
C00079	1.1706e+06	1.1966e+06	1.20241e+06	2.4492e+06	2.77343e+06	2.6968e+06
C00166	93962	90175.9	88484.2	110544	142265	124849
C00074	37021.2	36859.7	38525	37582.4	69736.1	58789.9
C01005	1265.44	841.537	883.338	227.589	399.476	140.895
C00148	597409	584710	591289	2.12006e+06	2.57077e+06	2.19923e+06
C00119	33.5045	45.9505	58.0628	0	145.096	73.1096
C00314	198235	179590	204309	334660	368642	345611
C00022	451064	453390	466196	667931	1.22424e+06	748674
C00021	486.446	193.641	151.959	2409.53	102.288	990.772
C00019	476.674	408.596	355.449	420.344	439.502	439.554
C00065	213443	192698	214601	34917.1	45891.2	39340.9
C00315	0.270317	0.0936648	0.363569	0.741748	1.50256	0.395819
C00042	173125	157332	164338	193219	305912	218241
C00245	901963	807064	889196	2.53256e+06	2.73518e+06	2.30355e+06
C00378	40.8641	54.7339	125.068	496.866	769.629	298.127
C00068	185.427	91.3726	105.048	40.7353	103.484	147.375
C00188	1.70587e+06	1.68316e+06	1.76581e+06	3.66074e+06	4.35929e+06	3.96477e+06
C00214	29569.4	27015.8	30861	52373.4	54275.4	52248.3
C00178	65.2817	57.6802	59.7843	197.517	339.643	245.526
C00078	108829	114640	116515	149323	152794	168613
C00459	1601.14	2060.12	2189.74	5673.91	7380.52	8710.31
C00082	583313	585722	610895	1.44584e+06	1.55706e+06	1.51633e+06
C00015	196562	187156	178816	233624	264834	239584
C00029	206009	210554	214580	312334	352277	313968
C00043	479958	480260	444969	1.27786e+06	1.40449e+06	1.22591e+06
C00167	21132.4	22563.4	23434.4	48737.8	56036.1	48657.2
C00105	42374.3	42541.8	40697.1	29924.9	64668.3	32203
C00106	119682	135615	100487	71482.6	86428.2	78384.4
C00366	387.414	2068.07	684.275	4472.12	2067.38	4389.87
C00299	57896.1	52223.3	63816.2	208465	227981	229852
C00075	734.568	691.906	629.083	722.28	966.999	861.567
C00183	65286.5	63592.8	54079.2	63282.6	83197.7	79195.4
C00385	72550.5	71320.5	86634.7	233086	288138	255503
C01762	3496.86	6143.44	4841.71	10774.3	13214.5	12215
